# Supplementary material for: Comparing the effects of empagliflozin and liraglutide on lipid metabolism and intestinal microflora in diabetic mice
Source: PeerJ. 2024 Mar 15;12:e17055. doi: 10.7717/peerj.17055 (PMC10946396; doi:10.7717/peerj.17055)
Supplement: Supplemental Information 2 [file peerj-12-17055-s002.xlsx]

## Sheet: glucose
NS	DM	LirT	EmpT	Emp& LirT
9.1	32.4	11.8	13.8	8.2
8.7	25.7	12.3	18.7	14.5
9.9	24.4	19.5	18.6	11.4
7.9	22.2	16	15.1	10.3
10.1	25	10.9	16.2	10.5
10.9	21.3	14.7	17.2	10.9
	22.3	13	13	16.4
	19.4

## Sheet: lipid
TG
NS	DM	LirT	EmpT	Emp& LirT
0.507	1.74	0.779	0.599	0.536
0.41	2.329	0.917	0.674	0.596
0.692	3.18	0.683	0.846	0.674
CHO
NS	DM	LirT	EmpT	Emp& LirT
2.925	7.62	6.09	5.419	6.348
2.879	6.847	6.13	6.897	6.025
2.796	7.013	6.08	7.6	5.346
LDL
NS	DM	LirT	EmpT	Emp& LirT
0.293	0.459	0.552	0.341	0.424
0.355	0.524	0.558	0.372	0.302
0.351	0.686	0.421	0.387	0.416

## Sheet: renal function
BUN
NS	DM	LirT	EmpT	Emp& LirT
33.827	54.944	49.249	35.683	36.1788
33.403	44.306	42.134	29.45	43.4532
38.388	69.586	44.369	33.205	42.3276
CREA
NS	DM	LirT	EmpT	Emp& LirT
26.292	49.299	28.746	31.155	24.237
23.85	42.447	16.368	31.452	36.306
24.777	41.929	19.626	30.714	26.973
ALB
NS	DM	LirT	EmpT	Emp& LirT
178.25	673.38	524.361	84.0292	475.368
139.486	659.219	475.368	199.862	445.277
178.25	692.357	507.493	291.092	397.127
239.238	659.219	403.673	209.909	418.479
