# Supplementary material for: Comparing the effects of empagliflozin and liraglutide on lipid metabolism and intestinal microflora in diabetic mice
Source: PeerJ. 2024 Mar 15;12:e17055. doi: 10.7717/peerj.17055 (PMC10946396; doi:10.7717/peerj.17055)
Supplement: Supplemental Information 3 [file peerj-12-17055-s003.xlsx]

## Sheet: Sheet1
ASV ID	E4	E5	B2	B3	E2	E1	E3	C2	C1	C3	C4	C5	D2	D3	D5	D4	D1	A3	A5	A2	A1	A4	B4	B1	B5
0e8cd74fc459c9d59257c4f7bcd5dfd0	0	0	0	0	0	0	0	9235	17342	15949	9850	17185	228	309	0	0	33	42	30	0	43	48	66	38	61
483be645c014c5792b07593a836e2123	11129	15766	230	238	5337	10583	11833	0	139	121	0	0	0	0	55	43	0	0	0	32	0	77	0	0	0
312555586fe415c688e5a9ae0314c988	1231	223	636	377	238	100	448	2013	2922	2694	2811	3450	8374	8094	3256	4065	3522	266	187	306	331	323	1657	671	2973
60eb320de124ef3f4b11a7626ce0abf5	0	145	246	190	2643	1958	3819	252	17	163	35	54	19	1774	341	26	9058	3345	768	2600	1067	957	219	226	19333
8f61e623de7d7f2e3072dcb712056fa7	528	644	444	376	435	78	658	1858	1836	1633	5214	1583	2773	1507	2520	1180	831	789	656	294	2722	2988	2228	915	1209
a1d51359256f94e7b95dacc7b4129453	0	0	0	0	6	7	12	11	8	0	0	7	12	9	37	29	48	3307	5012	5124	4387	4137	28	16	30
c963556b5f022449d0c0c5a5bfbe1891	78	86	4042	2328	364	377	332	151	378	478	87	452	1684	2314	2075	2980	2540	452	94	387	33	107	1056	2956	792
b5d810287022aeb023caf8ac8a22e55b	2283	3318	80	78	10332	4778	1186	976	348	633	1171	396	22	1565	0	104	0	0	11	0	19	0	8	0	20
de7a47eca1f44e94cc013a5df91e44c3	305	856	727	554	98	83	1104	383	736	628	678	757	401	4049	3102	4303	2332	68	41	91	504	163	2647	630	334
591ed1d6afd1e79ae33d6b6cd0c6b185	0	82	41	66	58	42	87	27	90	11	45	21	223	46	135	117	117	137	95	155	108	230	129	104	121
9e20a235c547acc52759d1b7c6e32662	130	61	1454	1157	406	622	47	257	28	222	312	26	3451	1743	1417	2240	1911	136	32	157	25	75	3326	3207	2142
2aedc45f0d95e4a0aa910d784d9a157d	3208	5636	81	84	3777	6512	1809	589	236	576	720	56	43	49	18	30	31	14	16	12	35	38	53	34	23
de6fd700296bbbdf6d065da5ab9b6d71	0	66	3900	2583	157	56	42	0	3	23	34	8	776	663	1121	2883	2685	40	19	20	9	22	3266	3232	1348
0a7909baf81962e17f5c8ab41c4f31c2	0	14	43	44	715	1076	927	113	5	76	69	17	62	829	35	49	6534	798	195	2206	36	186	136	53	6904
059e004695f0fdd321ce861a9c7b75cd	665	5093	331	455	957	269	3469	627	2230	902	709	1773	17	72	199	170	20	48	82	31	0	62	1610	290	62
23f408fc20b751ec119fe375f4901bf3	0	29	0	41	32	38	12	1169	4376	1572	2534	4941	94	108	0	28	26	38	31	0	0	33	0	32	29
583a986f5ebf9d33038ff60eee737e06	2337	181	146	74	2323	1687	1360	938	1810	392	1987	704	104	140	75	69	132	68	48	82	38	36	42	33	30
1a2e12038377659c9f7552762e11f4e5	949	3278	0	0	1975	2399	1968	1263	377	3763	352	174	15	62	0	0	0	20	41	13	0	26	0	0	0
f64becfec88c000e31e1b84c0de1354f	144	414	501	411	267	84	937	1524	2089	1990	2432	3181	34	0	9	21	20	0	7	7	0	18	1022	414	191
f64cafb46d13d8e5825677d185fa1d7e	58	69	1578	3130	98	98	126	246	756	540	126	849	1090	695	102	260	388	18	24	5	0	18	1099	1007	444
af70d3a4d7eb9610c2c307b40c8f9db2	15	25	276	203	87	105	90	30	143	96	6	172	125	328	108	301	114	1430	1837	1277	1804	2554	123	191	75
c933c939a41ae7479c131a84400c1992	0	0	0	0	3	5	3	0	3	0	0	2	7	7	16	23	29	2518	1883	2477	476	2630	5	0	3
cd2f6741d7fdf76e5866745d1a73c283	206	176	40	38	1507	356	1064	1417	60	128	2833	42	654	46	0	408	1092	423	107	565	74	254	52	93	688
63e0f7a3d9ecd273956314a549270088	0	35	2644	1993	104	394	31	46	17	62	45	27	1523	298	313	2023	757	44	28	30	0	20	35	339	1351
07144dffd41a15027638516778312a02	0	2199	23	21	2282	2623	5322	0	0	8	0	5	9	18	0	0	0	0	0	21	0	0	0	0	7
dc129b1a14f7d3bed294ef4befbd1098	832	834	674	592	1651	913	168	398	157	232	387	123	1182	598	131	336	786	312	423	367	37	68	186	51	25
9d5e34bded42ca5e10229d3fdc4eaedb	272	453	600	791	92	110	507	223	383	139	273	69	242	718	123	183	483	55	38	358	238	1139	1750	400	354
9d74ace509cb12522dfef0379ba9928e	0	6	815	486	13	65	16	0	271	0	33	381	579	636	869	1047	1046	379	267	999	51	173	441	1026	358
620d9972b8f99e8ca94183e2023fb7b8	0	0	0	0	5	0	0	0	0	0	0	3	0	0	8	8	35	1559	2339	1138	605	1814	0	0	8
cdd07976a8984507bcca243c80c255ea	0	0	0	0	0	0	0	0	30	0	0	0	99	0	36	32	24	17	18	32	0	23	0	0	0
7ad524f4ccacf47d2c9ab920b5015a97	68	72	1209	1193	97	68	212	197	168	431	171	131	1282	421	403	397	754	133	130	142	206	179	210	496	130
8d5a59a2011b8da3312cffd3b5870949	0	0	109	75	0	0	55	305	514	457	475	600	1447	1393	583	742	708	0	0	0	0	0	284	121	559
dcd1d7bcd77be5b4897943dad3fc3402	53	201	696	971	21	51	69	30	46	64	66	31	180	1546	1006	1310	1127	23	25	12	0	15	81	674	188
e7d58be8110a163662964b21d8269b59	0	0	0	0	0	0	0	230	369	370	164	347	437	92	29	18	105	9	0	14	0	7	141	16	0
b7b8924f3ea452a34148120303263038	85	120	747	503	438	537	122	0	12	19	0	13	947	1001	419	1292	45	21	25	57	0	17	533	622	393
6f1c70b6d9e037711c028629ca233185	59	105	679	1459	128	143	119	155	116	271	383	86	504	560	399	499	920	110	125	64	0	103	130	549	187
f7339355ca575f466f41fbd988afcbff	273	1025	61	73	656	854	585	456	600	1218	307	508	44	0	0	24	0	0	14	0	16	0	84	52	14
cb1e0d071f55234456c773ba3c60b18d	71	94	618	881	124	60	73	99	155	316	127	131	596	909	691	282	267	171	262	174	106	196	115	400	399
6ca1326d225d72bba74fb6f0087ea590	0	198	298	582	149	0	0	0	141	134	147	146	579	709	357	277	228	317	385	414	0	390	138	336	339
7314e09006c7be4a1120840e278f26e0	0	533	541	450	120	36	572	188	417	205	455	627	0	100	135	197	68	0	10	0	0	19	1624	732	189
eb35d78328f83f203c1174287c2c9a0f	298	343	310	123	441	176	754	200	227	116	564	274	218	145	375	83	107	248	277	97	29	221	198	484	431
5040b2a2e66ba01e8b06698518b025d8	0	111	1550	1567	22	355	76	0	0	12	37	3	685	590	310	683	655	9	7	0	0	0	98	7	246
98d95a9d975940db8d94df7fa98d24ec	306	468	501	438	125	33	478	236	409	177	450	534	26	0	139	148	80	0	0	0	19	0	1547	704	155
878fd5ad92e2f7bea2881e6df1f9bdda	43	33	815	1269	54	113	65	107	414	247	243	488	185	59	97	140	172	93	150	159	56	120	301	605	136
c19b805fc08efbefbec543732e9d9297	118	95	565	354	78	311	83	104	61	73	76	18	646	387	239	1028	423	164	137	389	48	134	441	393	434
80f3beb1e280e5eaae1d2e3200f688d0	0	0	752	466	0	0	55	97	21	22	213	42	345	306	121	236	196	109	0	0	0	95	1468	1919	333
a7aa4a9c9a987e46d3f0330457f15693	91	0	0	0	0	0	0	0	0	0	0	0	0	0	0	0	0	0	0	0	0	0	0	0	0
68d91efd23bd572a2596634c5e1a2a90	12	20	554	745	63	28	21	52	19	71	198	25	527	175	567	98	761	141	61	323	77	158	320	547	97
8df3089174baa460a2ebfc39fdb3c178	12	1803	14	13	1231	2287	724	184	67	327	169	54	9	6	0	0	0	110	0	0	0	75	5	0	0
50c0ab978bbf9a92ff5d57b6bd3a4f7e	0	0	0	0	0	0	0	1320	1113	813	2315	1284	39	47	0	0	10	101	54	0	0	62	6	0	0
5d888c4f1d83f046841e0b080d2e66f4	135	1322	11	13	1516	60	715	0	575	0	0	21	0	0	0	5	0	0	0	0	0	0	0	7	8
8f17ca772f951a71f996cc1efe210c23	136	67	798	1345	104	81	34	44	43	108	48	29	218	426	146	175	501	4	0	0	0	4	335	1034	173
8a02be522ff8453a84947940605eda25	124	246	0	0	439	167	994	570	925	832	1194	988	15	34	0	0	0	0	0	0	0	0	0	0	0
29e1307a91ac17e1e02d71c95d72d286	0	19	0	0	15	74	0	398	1364	501	794	1373	95	59	0	33	0	25	25	36	31	0	70	47	40
b9328aac7ce42f1d4ad25c07967ea69b	1024	1329	39	35	956	287	995	57	0	108	0	0	0	0	0	0	0	0	0	0	0	0	0	0	0
3a9ae0fe7da1cd0ddc70785ad815c717	128	120	351	610	127	37	136	160	215	318	276	207	362	610	354	182	345	57	82	0	129	61	224	267	265
a2b48cc2faf915571fda275fbb7a404e	90	443	424	399	105	26	495	183	368	200	365	553	0	31	111	105	61	23	0	0	0	0	1382	605	121
78c4e39e728cf1df5a6d378fd0ebecd3	0	9	929	941	9	9	11	0	0	0	5	0	0	19	286	11	0	0	0	0	11	12	3056	453	215
64bc4c08c99a13b5e322d3f738b50af4	0	0	0	8	0	0	0	728	1039	1365	1021	599	27	29	10	11	8	15	0	0	10	0	6	7	4
cf64002ea680068cfd84aba630f20fca	0	0	229	212	6	0	0	0	0	9	0	9	56	328	182	768	238	1246	1192	1073	0	741	6	0	12
7c0faefb50988229393a4b0db4016537	0	0	0	0	0	0	0	1140	989	713	2038	1150	0	0	12	0	0	98	59	0	0	62	0	0	0
3765fcfc00972ad19f643909bacb8a9b	11	0	1556	2535	7	143	35	0	83	0	6	112	0	0	27	0	33	0	0	0	0	0	16	11	8
0f6d46c70548d4ce709802b6e3162f6f	13	25	23	0	0	0	0	0	31	0	0	6	22	0	23	9	22	9	14	19	0	36	13	0	0
d8381cf157417a4184acf2b9b18beda7	0	0	0	0	0	0	16	0	0	0	0	0	0	16	0	0	0	1066	1342	2950	52	373	0	4	0
41f45c0ed64d083d2cc3bd5750efe9a2	0	0	13	6	0	0	0	64	45	235	25	41	1029	15	35	0	32	1240	496	1230	14	1252	6	14	13
0578e0770c125d8458d50053710ad18b	0	341	33	42	25	4782	407	0	10	18	0	11	43	22	0	14	5	22	0	20	0	0	17	14	0
26d98efa38e835733f817b6900d10ed7	74	76	472	882	38	126	123	156	192	339	259	103	22	73	175	38	61	29	24	39	47	0	755	794	295
233e9c162d5a5b9c10a2ae669e9864ef	134	126	208	115	559	459	49	0	0	0	6	8	207	611	250	308	139	0	0	5	9	6	216	1149	830
6601460f15399fb53a947bf851f90164	0	0	289	105	0	0	0	275	265	395	50	368	162	470	336	659	347	799	404	306	79	297	0	14	13
854afa046caddb64ad95ba7f8ae42d82	0	0	0	0	0	0	0	0	0	0	0	0	0	0	0	0	0	1762	2288	0	0	0	0	0	0
2bd9efc537f78c46be369a51f1a5ea4e	51	80	199	168	91	133	30	52	58	30	80	47	695	473	322	972	519	134	80	55	0	139	137	298	156
fd81d17e4f1689f2fce8f60d3ea6e66c	0	0	0	0	0	12	0	0	0	0	0	0	5	0	0	0	0	723	1071	909	1007	1196	6	0	0
d6edd4a7f528e5711a600b46e73022bd	7	41	259	169	5	0	63	31	104	46	43	88	76	1467	681	406	351	17	16	14	126	136	586	175	60
541aebf40b914acc51ca95bcbf5f9d07	0	0	0	0	0	0	0	0	6	0	0	0	0	0	0	6	0	781	777	844	846	744	0	0	0
274389b189da1f6136b33b4015d193f4	0	0	0	0	10	0	10	18	46	26	4	52	0	0	0	6	18	331	733	345	2311	549	28	16	23
73fbe9b778b095aa07b5c8f37ed24094	0	0	0	51	122	349	0	0	0	0	47	0	442	945	78	531	704	69	89	97	0	67	354	392	338
52e5699c94de102da70ae27e4ce69996	50	37	485	546	171	168	247	55	172	185	11	176	286	149	320	365	357	6	4	2	0	0	151	463	111
7d91203f175430765f14b752bd19c7b3	55	344	292	654	109	92	268	65	72	126	193	53	8	53	98	597	145	11	12	17	0	0	622	608	207
c35601485c997d472411274a47515348	0	0	97	96	5	0	0	0	0	0	0	7	659	103	137	189	78	390	667	429	524	660	0	374	8
028889e7f3906177c81c27252fc03769	45	2	28	17	84	30	35	57	65	10	190	10	424	23	94	27	10	412	582	882	18	241	70	85	275
d1936a86defac30e61a0595fab1b5db3	0	2	0	0	0	0	0	92	18	21	221	13	13	14	11	11	20	896	361	1966	253	710	9	15	0
d2175771e519c04c2fac6833ac7b7533	0	6	230	347	0	0	20	37	99	48	26	80	0	0	55	150	9	104	123	178	971	286	1097	460	63
389fbcd230e513db0374cd11bb83221a	0	285	297	298	82	26	337	74	228	154	99	238	4	11	35	52	0	0	18	4	28	12	1578	461	138
29d41f7724da8f39aa8dcdf8104add95	0	0	0	0	0	0	0	0	0	0	0	0	0	0	0	0	0	717	1148	491	258	938	0	0	0
dc1d47823e38b4571139af9df7309910	0	0	146	135	0	0	0	0	0	11	8	8	758	180	382	1264	107	0	12	0	0	15	451	314	435
37c666af5c0de770f151f995cd46dacf	0	0	0	0	0	0	0	512	965	847	1087	997	0	21	0	5	0	0	0	0	0	0	0	0	0
8e77f795bc7a02aa80804ccc32ecf48b	0	0	381	516	0	6	0	6	5	10	10	11	419	176	333	220	219	76	96	106	41	68	623	415	393
f82c31bad94040f1b781de1e7647f178	0	284	290	263	77	28	346	161	263	113	251	348	0	27	87	118	44	0	0	0	0	0	901	405	80
5cd20cebbb998c1d2de44cadac99c742	26	27	45	71	59	24	28	0	19	17	0	21	44	160	163	57	96	352	504	324	776	406	21	69	62
fe7328e2412c7098575d951097b9bc41	0	128	223	96	47	30	0	122	31	26	441	19	38	157	611	686	0	106	79	0	0	117	120	461	322
24da6c3b4969ea2a396f3d97bd0798dd	0	17	0	0	95	17	40	0	0	28	0	0	0	0	13	0	10	525	536	592	704	554	6	0	6
9f173e90126a7b7c3a5b3a896ba06a75	209	252	14	11	125	689	398	144	267	388	195	309	7	13	0	5	4	0	4	5	0	0	5	0	4
b3c173bbd1917ed1cc700d30b2272066	289	292	247	174	566	299	43	136	52	80	125	43	417	172	40	108	223	96	125	117	0	25	62	19	0
6beda361362fce56f2b64047a51ed8f2	59	144	0	0	113	203	193	350	320	324	1126	259	10	8	0	2	7	155	86	0	0	125	0	0	0
bc657d20356afe438f51e0afcd7a668e	727	86	72	30	1010	538	14	142	78	120	109	49	106	80	75	22	167	0	0	9	0	0	44	37	48
3d90b8f18314507f2ac3ccddf722e7c6	105	5	0	6	16	101	371	572	66	1781	24	60	325	11	10	35	7	38	20	21	0	53	11	6	0
1dd2bafef23f0b7757e6cfbf1a4bce83	0	0	1196	294	0	0	0	0	0	0	9	0	21	49	52	1202	344	179	287	63	26	84	0	30	33
80fed271acb84f7feaec9f7d573f82ee	496	496	19	0	500	951	168	120	56	276	8	72	0	0	0	0	0	0	0	0	0	0	0	0	0
ae92751ce0103cf1fe77dd7f219da00c	0	36	259	556	0	37	70	109	165	282	204	87	0	0	174	0	0	0	0	0	0	60	602	589	198
7003f9e4b939fc8b3cbc14cdbd348824	434	0	0	0	331	104	0	618	149	311	1165	102	0	13	0	0	0	0	0	0	0	0	0	0	0
c131cda46f8601b749ded9d6b408970a	7	10	33	16	250	491	506	87	0	10	65	0	10	53	13	28	1147	330	81	102	58	54	11	18	318
7d7c06067fefc50c480fdf7153a3ee22	0	0	808	873	80	0	0	0	0	0	0	0	287	139	0	0	202	70	0	83	0	67	245	337	45
ef97d79b77b357b4efe61b0a31153be2	0	0	0	0	0	0	0	0	0	0	0	0	0	0	0	5	0	450	660	678	648	628	0	7	8
0b9238c94b6a999671e51587f0c2a475	0	20	368	182	59	28	21	34	54	57	8	108	644	622	82	261	86	99	117	139	28	44	23	151	159
4b38473099dc5f18b73be535e282921a	0	79	109	130	147	71	103	38	52	44	106	71	102	111	105	45	105	290	141	250	148	333	144	144	103
df6fc4b4a8026b83b2c276f332fd50cf	0	0	0	0	0	0	0	0	0	2	0	0	0	0	0	0	0	503	383	379	492	623	4	0	0
d53f2eb27a667095f7100d5bd72979b9	68	225	0	0	87	71	106	0	0	0	0	0	0	0	7	0	6	396	398	370	499	353	0	0	0
833112e913f87497c57975c343a5b3d0	0	0	0	0	82	0	0	607	434	1267	191	370	15	11	0	5	5	0	0	0	0	0	6	0	0
3961bce3d8f9c5146341d17913bcaf6c	0	0	0	0	0	0	0	4	0	0	0	0	0	0	9	0	0	502	651	571	453	561	0	0	0
a417cc2f0660a5f6fd2d43c2142e1bb1	70	53	332	177	110	83	53	82	49	0	92	67	339	148	191	64	138	51	32	120	0	47	212	98	234
ea9f0425c7c696a1c8670b6897268b74	0	5	792	293	0	0	0	0	0	0	5	0	210	0	439	0	251	0	0	0	0	2	219	421	173
a439423b24e5643122503643f7f22c5b	0	94	0	0	12	40	256	554	179	1484	59	22	0	0	0	0	0	11	0	0	0	18	10	0	0
7a32a8fb995abf3992ce60914ff8dd43	0	0	0	0	107	0	389	33	20	0	57	11	0	0	0	0	0	547	69	42	0	495	113	0	0
b352fdf358f88c5b6ddc83e6fb5b77d1	79	162	78	150	71	42	127	0	0	0	0	0	181	293	175	135	157	19	25	59	106	99	134	97	53
84bea93dbf822e967d6ced37bf6f7443	294	42	0	0	507	1292	46	18	21	21	28	17	54	0	0	199	32	58	140	0	0	39	0	0	38
5c88c24c8ed7e6e398b6124696eaf1a4	16	13	113	136	32	18	26	35	44	62	25	57	442	95	207	90	79	133	138	257	285	188	59	93	31
3ac84b6124eda7da52349f8a82ebe953	0	0	0	0	10	0	0	0	0	0	0	0	0	0	0	11	7	363	1339	14	0	1218	8	14	0
ec0205fa7153e02c0014a22c4a758905	0	0	347	216	0	0	0	0	0	0	0	0	239	53	141	99	83	0	17	23	0	22	527	41	670
ddb421f31380faf7e5512addbc159887	74	457	17	15	1873	153	139	0	0	14	23	4	11	18	0	6	10	22	14	11	0	23	8	0	0
a78c90b77b8da7e25b2933c55c3ddc6b	55	51	331	281	144	156	17	20	0	0	33	9	16	291	39	0	50	52	38	23	0	79	357	285	65
a5cb8a00e9f5225dbc91700a451d86f4	26	0	131	108	0	20	0	24	0	35	0	0	172	370	273	987	65	0	82	37	0	43	20	219	195
e7b2c24c5f0d48a0677e3bc80d3e000d	0	0	46	34	0	0	0	0	0	0	0	0	28	77	172	50	79	493	204	446	0	250	149	245	214
d4c26bc1e38a8557992f8641ed1a2c8a	0	42	82	0	69	109	35	0	0	0	0	0	222	272	254	490	219	138	111	152	0	103	58	88	32
aee0040f957c891a609b619ddf6dd608	0	0	208	187	83	0	0	61	101	0	214	116	119	60	45	27	236	15	17	92	0	16	220	151	188
39977c54fe9091fa02816cbbd116cc15	68	71	529	336	81	0	0	111	154	264	0	134	0	0	0	121	0	61	0	0	0	56	90	87	211
d5bd0acad1ed4f3e8c81060a973b0fd3	0	18	242	228	43	28	0	21	15	0	24	14	65	56	35	220	150	71	66	67	31	29	441	289	218
ee8f7ff9f92442786844382a40c3fef7	0	0	243	130	16	0	0	79	18	42	166	18	85	115	116	320	137	80	45	154	0	40	240	196	132
8b80109a6c7b80740944079058932cc9	0	0	0	0	0	0	0	0	0	0	0	0	0	0	0	0	0	314	361	465	354	411	0	0	0
c2fcdba35d452a394515a2f31f66e8ad	0	27	183	173	26	8	41	0	0	0	0	0	47	240	72	884	41	155	81	0	0	137	257	44	40
ef16fcc0a0a0c9630f868985ca0fd330	0	0	370	181	0	14	0	0	0	0	0	0	30	18	171	42	107	0	0	0	0	0	358	598	208
5e09343b7991a4bb11a5cffbf6120cbd	0	0	0	25	4	0	0	42	94	138	28	97	285	318	304	531	570	0	5	0	0	0	0	18	0
442ee36c72f9c80220d33a368f8e6d8f	55	50	180	287	98	55	28	0	112	0	28	95	7	0	0	0	38	89	116	78	50	93	57	203	146
c9b5ef2c8df983d089c1f7232ed47d81	0	78	80	69	0	0	127	227	333	285	373	461	0	0	0	0	0	11	0	0	0	0	129	0	32
36ad14a321e596b9e001c995060769a3	0	8	207	213	18	3	0	0	8	7	19	8	38	327	251	382	187	81	82	36	28	98	130	113	48
0672196dc6b05fd54615699dc5a2ac4f	0	0	375	364	11	0	0	0	0	0	0	0	0	68	38	68	133	5	0	0	5	0	382	692	157
96f08111cc772488ce67ccc0cd538c74	0	54	79	89	37	0	141	192	277	243	304	385	0	29	0	0	0	0	0	0	0	0	174	63	30
916344262b02db933329bd4f734c7f8a	0	0	54	43	28	23	0	0	0	0	0	0	308	54	419	63	0	86	37	24	0	77	230	467	181
5121b22b478cceca529a25e77617964e	152	75	0	0	61	68	94	0	526	0	23	582	15	23	13	24	19	20	0	39	7	30	22	7	13
38b83a8a6b741606457e2d46c2ca8398	133	94	283	153	214	183	20	100	42	65	116	48	0	0	0	0	0	54	31	172	33	52	164	0	0
11e66d32453afb66499f7d0638263ba6	18	12	110	117	38	76	15	19	46	69	18	29	174	104	32	104	132	12	31	2	0	29	113	303	116
262d9b1f51fd825b09659c4e1ce0b451	0	0	32	34	0	19	0	30	39	76	24	35	170	70	63	73	84	461	238	182	10	225	88	103	75
4c31bf1e716a7fa1d04179b1bb89c401	0	0	0	0	0	0	0	0	0	0	0	0	0	0	0	0	0	344	389	258	254	434	6	0	0
a03424441f6d0f80f8d6a04f85015c2c	0	0	0	0	0	0	0	0	0	0	0	0	0	0	0	0	10	335	429	245	216	437	0	0	0
45c6fe9b0cf8e9560c745157e598c742	218	496	25	28	351	294	240	20	134	14	18	82	0	0	0	0	0	0	0	0	0	0	0	0	0
90f6a78c3791750e0753e00359ce042f	0	158	151	134	0	0	158	0	143	71	143	175	0	0	0	37	0	0	0	0	0	0	492	211	48
f69045904699eefc4f5f8b0c3f809d7e	48	60	0	10	239	0	4	0	0	0	0	0	0	82	93	0	183	12	18	9	0	0	497	128	151
2187808f8f3c2b42d8c22d0bd3ea34df	0	0	141	99	0	43	0	0	0	0	0	0	0	60	62	0	0	67	40	48	0	78	124	502	418
8d4c73fc9277a090add2539a3c8a904c	113	69	11	25	120	36	67	117	219	275	167	300	4	6	0	0	0	0	36	25	0	26	0	12	0
5a800283d5784eded9bc28e4ef87d9f6	0	0	69	146	0	0	0	0	0	0	0	0	117	169	136	77	49	178	169	215	87	135	13	87	48
9991030520fcf8ad16fda244f5d0c039	0	0	0	129	37	0	0	0	0	0	0	0	54	253	359	25	66	156	180	129	0	201	36	69	75
d40157b565eee0b042aee57f212356d9	70	165	0	0	242	0	0	204	11	179	141	8	102	166	124	205	230	4	4	0	0	0	0	68	124
000fe74555b8d995714372caccc35381	0	0	163	131	4	0	33	0	0	0	0	0	0	0	58	5	0	17	0	0	0	17	363	748	294
f436d2c484d1594065026f607af2f5e1	23	0	204	57	16	10	0	0	16	18	0	15	245	110	204	190	90	129	67	25	36	179	87	117	44
4f136c704b5dc9ca058789e408a43cbe	0	6	0	0	0	0	0	0	0	0	0	0	0	0	18	0	0	119	296	148	913	226	0	0	0
c54b82f03602dad5fa67d7a9926740b7	0	51	115	59	52	22	0	55	29	44	92	18	96	132	43	352	51	42	26	91	0	21	170	322	83
210316fcaa1ae856329e5c1718ab519d	0	106	97	137	36	0	123	51	124	92	63	172	0	0	0	0	0	23	31	13	0	31	512	169	53
1fbcad403ecebb26e6c3d5a838bf1803	0	0	181	168	30	0	0	0	0	22	57	0	594	0	0	0	0	33	0	108	0	56	510	52	0
a002c73cdb874ca7e06c36351e991866	0	131	165	147	0	0	144	52	112	62	111	170	0	0	0	0	0	0	0	0	0	0	455	211	57
269a085940ab7db48e771a88f253bfb3	0	0	0	0	0	0	0	0	0	0	0	0	0	0	0	0	0	0	0	0	0	2006	0	0	0
94a6c6230999b5622a144956fde6c5d0	0	0	0	2	0	0	0	223	35	14	924	27	0	8	0	0	3	26	7	0	5	18	56	257	183
fd45859fc4f4e8d4534e8669da8dab34	0	31	281	327	0	0	0	0	24	0	0	37	33	122	106	156	215	0	0	77	0	0	256	163	57
f6869267e4de9d6422e10e9d3375754c	0	0	157	120	0	14	0	0	0	0	0	0	98	150	42	74	210	53	29	98	0	23	201	292	114
3f18fc9e62757a5b37d3bd85f7861815	0	0	0	0	0	0	0	0	0	0	0	0	7	0	0	0	0	128	287	125	908	202	0	0	0
6cde45145eeb5fe7f963f923dd616183	0	0	190	160	47	90	0	0	0	90	43	0	453	177	0	129	274	48	0	0	0	0	0	92	0
a1c1ada766e890f911fa14b2e417844a	131	136	0	0	171	16	0	37	0	36	66	0	0	0	0	6	0	445	106	0	0	495	0	0	8
64497a7a00396bcdf4866773acd2dd10	0	0	0	0	0	0	0	0	0	0	0	3	0	0	0	5	6	582	693	14	0	625	0	0	0
015d7b5e476fc08cc994dab3c4fc0a9d	0	0	0	0	0	0	0	0	0	0	0	0	0	0	0	0	0	253	268	205	388	308	0	4	0
8fba48611c151c49e73fa24d124d36d7	0	0	0	0	0	0	0	0	0	0	0	0	0	0	0	0	0	0	0	0	1932	0	0	0	0
e60bcd2881dbe39d7a6d8c00f649b790	0	0	219	127	0	0	0	0	0	0	0	0	65	0	116	447	88	55	99	27	0	54	170	318	16
e374bae72fb28adbd40ec67d63da8232	0	151	141	111	0	0	135	0	122	75	124	161	0	0	0	0	0	0	0	0	0	0	442	168	55
cbf8dafc9def7ebc98da8f059ed5c1c8	0	0	0	0	105	0	0	254	236	154	625	211	0	0	0	0	0	40	0	21	45	29	0	0	0
ebcb7582ea7494e2540c9b44c8960c1a	800	16	0	4	11	13	39	0	11	0	0	0	0	0	0	0	0	0	0	0	0	5	0	0	0
b160bdc9eeadfb9a1601989ef548321d	0	19	236	132	15	21	15	0	0	0	24	0	133	0	117	168	187	54	0	68	0	43	133	339	69
80287fc3b84809014e88be9c4f906a9a	170	81	0	0	77	98	285	72	0	0	91	0	155	142	71	87	58	0	0	0	289	0	0	0	0
70bcba623c0bddf0deb41d3db6838109	184	128	0	0	104	507	51	161	44	25	385	41	9	3	0	0	0	0	0	0	0	4	0	0	0
6d9229798754e188e8ea9744c0f70d85	0	722	0	0	0	238	177	0	160	0	43	51	11	0	0	0	0	0	0	0	0	0	0	0	0
fd66827fe5175aca67301d9f187d2820	0	15	158	132	34	0	16	0	0	13	29	22	71	59	54	79	147	87	48	0	0	54	183	262	116
2eaccb9a9987e4b5dc8076fd09958367	0	0	44	23	0	0	0	0	0	0	0	0	165	391	75	544	401	14	6	0	0	5	0	26	0
7df610e63e14ed64f727741fd81b0165	0	0	0	0	23	0	24	0	0	0	0	0	0	157	34	189	133	0	0	0	0	0	892	59	106
66cc884f8033218764926f530407412b	67	185	7	16	276	88	74	68	107	109	233	68	0	14	0	6	6	5	0	0	0	5	5	0	0
c3bf628368dec5393a59b42c0d62ee6a	0	0	12	0	25	703	832	0	0	0	0	0	0	0	0	0	0	0	8	15	0	9	0	0	0
33d6af86b31e9c9b7924418700aa6769	0	0	0	0	0	0	0	0	0	0	4	0	10	88	88	0	161	0	0	0	0	0	514	144	160
97dfb71585624e3236e7072b099b19a1	0	0	0	0	0	27	0	0	42	55	17	33	0	0	45	144	20	0	0	0	0	0	38	939	99
c23775edd63c33d9cdc28b1c4bfc759a	0	0	245	127	0	0	0	0	0	0	0	0	142	126	83	159	202	0	0	0	0	0	109	322	61
2d2a2eada828b71bdf9cbb11982ce24a	0	0	0	0	0	0	0	0	0	0	0	0	0	0	0	0	0	211	1045	0	0	381	0	0	0
a353b70ef153331bfeff952d4006c456	0	0	0	0	0	0	0	0	0	0	0	0	0	0	0	0	0	103	225	121	754	175	0	0	0
b4e0adb2112585c9c061ac5cee007d52	0	14	159	70	75	0	0	15	0	14	31	0	7	19	330	108	184	35	34	0	0	30	35	153	68
d71099347bde915d2efdec5d2a5d393e	0	15	116	229	0	0	0	42	0	0	0	0	78	0	59	132	77	11	11	8	0	0	227	203	195
ad0c20dbc5cfaace4ce762124eddae3d	0	0	0	0	0	0	0	0	0	0	0	0	0	0	0	0	0	0	0	0	0	0	0	0	0
fa70bb1ed52fdf63362318a59614c54f	0	0	0	0	0	0	0	0	0	0	0	0	0	0	0	9	10	204	1018	0	0	339	0	0	0
648b1c408f44c48f81fcb16b8433f79d	0	8	2	0	39	11	0	377	10	50	1049	15	6	6	0	0	0	0	0	0	0	0	0	0	3
1ea5dbf91ed43507c5a85cc496123211	32	68	7	0	0	0	118	41	236	105	130	322	0	29	163	161	30	0	0	0	0	0	22	21	0
504d734fc3eb4b39bfcb335178c09cb2	0	13	60	93	36	0	11	0	23	28	6	15	123	63	105	20	36	99	93	88	82	95	33	102	66
e60fdf8e98fc00775aea7cfd57ea7850	0	162	0	0	44	29	121	169	257	211	235	141	0	0	0	0	0	0	0	0	0	0	0	0	0
6958da4c979b96fb9628451ae32ce775	0	0	0	22	0	43	0	0	9	0	0	0	93	47	88	0	38	176	166	118	206	206	19	0	6
71bb3dd7b229e5c82f0377f4953674a4	0	0	0	0	0	0	0	0	0	0	0	9	0	0	0	0	0	168	685	0	0	674	0	0	15
0f8dea6ab059baa16e65f49e913956bd	75	58	0	0	193	141	45	104	13	103	69	6	0	0	0	6	0	274	172	46	0	178	0	0	0
65822bbee514ae6e872951e978573558	0	34	166	112	45	0	0	0	12	0	37	17	68	88	60	34	37	48	56	57	0	41	174	79	157
2552405fc96469528e44cb8ec376518e	0	58	103	62	0	0	0	0	0	0	70	0	64	214	172	218	47	0	33	0	0	0	124	58	153
498d966f9ae5f38cde715c3a8d1098e9	27	0	207	209	0	0	0	82	18	43	58	18	88	36	50	317	59	15	6	10	0	0	78	151	9
b41d90a549f674d1d4213305030ec008	69	44	0	52	40	51	47	31	93	73	39	102	117	0	293	55	110	0	0	0	0	0	68	0	48
4ced68567be41bbab8b12a213a627782	0	0	138	49	0	0	0	34	98	46	19	98	89	48	83	40	206	0	0	38	0	0	25	215	73
690bbc264f2eb716319b7696e03e3fcf	0	13	97	92	67	12	0	0	0	0	0	0	48	22	12	41	93	0	0	0	0	0	98	744	52
8d4091f8e533b7b50e02b16d8401010b	0	40	103	220	30	18	30	0	0	40	0	24	186	144	124	145	126	0	0	0	0	0	36	78	50
05c6a601e771eb672b996f778521f901	0	2	73	40	0	0	0	0	65	123	0	101	52	159	0	199	116	234	115	98	0	109	12	0	0
62fe77e96573a0d08f46edd1602ee4a3	0	0	133	125	0	0	0	0	0	0	3	0	7	151	148	204	273	124	88	70	0	136	23	0	0
f23c041a69ceaa446d5b30c6a34091bd	94	116	57	54	164	74	148	27	59	28	31	67	56	42	82	30	45	0	0	0	0	0	10	20	11
b62fd07e2c96423bab395852c88fb147	60	116	28	31	83	53	63	51	102	125	68	76	146	14	60	31	16	6	6	15	0	0	20	10	0
d4e8fb6e5730003e5e44fed4393c4a1b	0	0	229	283	0	0	0	0	0	0	0	0	141	44	0	94	58	25	40	23	13	28	92	159	56
22edbbe33f4cad2f9d2ed853bad1906b	0	0	0	0	0	0	0	0	0	0	0	0	0	0	0	0	0	0	0	1437	0	0	0	0	0
a1cbe31afe02bb8b2a7653af878b50d9	0	0	0	5	0	0	0	0	3	0	0	2	34	3	0	8	6	0	0	0	0	8	281	808	217
c224ee192f10d46d327e11fcf0e0425c	0	0	0	0	0	0	0	0	0	0	0	0	0	0	0	0	0	136	171	165	386	184	0	0	0
3ca53903eabce6ddb11f1a8b8e99c40b	0	0	0	0	0	0	0	0	0	0	0	0	0	0	0	0	0	133	202	165	340	190	0	0	0
58df8527a14018a8ff16b6d05faecfa7	63	39	92	156	15	68	13	39	71	78	51	127	9	98	59	32	186	0	0	0	0	0	11	20	0
569ae6e38a27aec08a0934f22784dbc3	0	0	0	0	0	0	0	20	20	49	12	15	0	0	0	0	0	219	222	197	150	302	0	0	0
41f63e02cc199fe7ce28894304118a9f	0	0	0	0	156	0	0	0	0	0	0	0	0	102	0	0	88	451	90	0	0	327	0	0	0
9d668f96a2dbd0f107a7e3801cc6c6ab	0	0	0	0	0	0	0	0	0	0	0	0	0	0	0	0	0	135	193	206	348	208	0	0	0
97d1e195bc05eda9ace0317907795019	0	0	0	0	0	0	0	0	0	0	0	0	0	0	15	0	0	184	143	113	16	237	0	3	0
7d1ba5fd09f05e0204769051f55956c8	0	0	111	196	0	0	0	0	0	0	0	0	408	356	94	91	93	0	0	0	0	0	0	4	32
f0357155916be15a299c2dafe262d168	0	0	138	94	0	0	27	0	0	0	0	0	127	146	70	210	250	0	0	0	0	0	68	20	81
7f778d82debd92b68f3ee6462aafa815	0	0	278	114	11	6	0	14	37	3	23	10	49	20	8	41	198	0	0	0	0	0	306	70	20
cfd6efbbccb3da48fbd7fc2c5654d9ab	42	35	72	74	21	0	81	44	113	60	53	126	0	0	0	0	0	0	0	0	114	24	257	59	35
315bf6a49451981bd05eaf638a25ca7e	21	32	0	0	23	32	30	0	0	0	0	0	138	106	41	28	35	261	118	56	21	221	0	0	0
e9c4784dd3616810c67e8904fa3055b8	0	290	0	0	60	8	204	26	155	64	50	165	0	0	0	0	0	0	0	0	0	0	0	0	0
f27aa987d85bb2adc1a28169d06c4f67	0	0	0	0	0	0	0	0	0	0	0	0	19	0	0	0	0	0	0	17	0	0	0	0	0
8a623e2d395ebaa1b21508de68d6a8cb	0	0	0	0	0	0	0	0	0	0	0	0	0	0	0	0	0	182	222	292	177	162	0	0	0
aaabe26cacdb611cc9d674d327eca13d	0	0	0	0	0	0	0	0	265	0	0	288	0	0	0	0	0	122	555	23	0	85	0	0	0
0d8578a76a12da3c01f56908a81c024f	138	98	0	0	283	112	34	118	48	70	105	45	0	35	0	37	0	17	10	0	0	0	0	0	0
f0c8ca7d0e841315112474d060501a6d	0	142	0	0	7	0	133	259	91	503	69	81	0	11	0	0	0	0	0	0	0	0	5	0	0
fabb8e0032e3cfec402f98f809fa1d0c	0	0	0	0	0	0	0	0	0	0	0	0	0	0	0	0	0	157	283	160	231	252	0	0	0
5f737504acc11df6ccda56eee6a5abbf	0	0	0	0	0	0	0	122	0	355	26	0	14	23	0	12	0	298	37	191	0	223	0	8	0
223942d5341ae5e703e7e03f69391b30	0	0	85	69	0	0	0	0	0	0	0	0	115	67	61	204	32	86	31	26	0	60	43	164	45
86fe78d75193123512e3542feb4ec15e	0	0	41	45	0	12	0	0	0	0	0	0	200	55	90	366	33	0	0	0	0	0	105	93	133
188423e8cbbef8e68628bb6e11a037c6	0	3	212	635	3	4	0	0	0	0	0	0	0	0	0	0	0	0	0	0	0	0	27	167	101
29e38d2b9b4347c271aa8aee36d400a4	38	0	0	0	13	20	0	220	117	516	30	89	0	0	0	0	0	16	95	28	0	16	0	0	0
0309bde229b993ed5a221667173fc116	0	0	0	0	0	0	0	0	42	0	0	52	157	156	151	347	365	0	0	0	0	0	0	0	0
c2aabbd986b7ac7a2b9e8486c48f641b	0	0	111	63	27	16	0	0	0	0	0	0	14	224	59	93	119	12	13	9	0	9	75	287	90
9ce912f89a5c5aa4f9a5103732d68ee9	0	0	64	106	37	21	0	0	0	27	0	0	182	91	30	255	110	0	0	0	0	0	79	108	57
00d30653fb914d92e1e5a87c05f63a50	241	267	0	0	376	13	103	0	18	0	0	0	0	0	0	0	0	0	0	0	0	0	0	0	0
69ba38b087084b33240e3a8763d1c0fd	0	0	0	0	0	0	0	0	0	0	0	0	0	0	0	0	0	151	238	251	215	195	0	0	0
23da3a29ee96a4c129ad60bf010b5f9e	0	0	13	26	3	0	0	6	0	6	11	3	7	11	8	14	5	209	41	209	17	97	128	201	82
f591209e26d27536bac8dd1c1528725d	0	0	217	122	0	20	20	0	17	0	0	22	0	105	0	0	79	138	63	0	0	94	0	0	174
a8c11467a384f58e74fa1777228d3937	0	0	0	0	0	0	0	0	0	0	0	0	0	0	0	4	4	137	74	157	225	189	0	0	0
d90e8d6131ee4af08ef53fc6c69bd6f3	46	50	43	25	59	50	15	67	91	53	86	77	61	104	46	24	21	0	35	28	0	0	25	12	0
16e4b614f72ad99deac616670ff11797	0	32	81	51	76	40	0	0	0	13	13	0	160	116	67	19	115	0	0	13	0	8	55	141	60
a5caeb88665b76e5d62372b0d2bf461e	0	0	0	0	6	4	0	0	0	6	0	0	136	425	0	458	0	67	30	14	0	13	0	0	0
5c9c1d93f695f0a51d298c9b67bf12a9	0	4	45	36	21	7	0	0	0	9	0	0	147	41	38	16	25	152	58	66	0	73	45	133	65
4f5849ab1c818540c3e36aa5fcacc92f	0	0	59	44	15	0	0	0	11	0	46	0	0	53	11	25	28	42	24	82	0	22	0	158	297
b8e1fa7c35fa1391d609df2a260fd114	144	0	0	0	241	102	0	41	146	99	0	108	0	0	0	0	0	0	0	0	0	0	0	0	0
bffbe6a9327f107aee0f2bb01618cc6f	0	0	18	7	5	71	0	27	0	0	44	0	8	27	0	0	0	360	42	75	0	277	9	27	0
e919228bfbeb8018d9ecde2a0c74b22e	0	18	76	50	0	0	0	0	0	0	27	0	89	57	74	102	61	58	39	93	0	28	71	84	85
53bb6850e791c6e3ff83cfe20e7a17da	0	0	58	42	0	0	0	0	0	0	0	0	56	343	82	210	50	0	0	0	0	0	0	208	79
03b4f92715d78a3335bd07d75b81840d	0	0	211	130	0	0	0	0	0	0	0	0	18	0	32	0	0	0	0	0	0	0	466	107	184
a340a25d6c1628f78f4c799e4958be93	0	0	0	0	0	0	0	0	0	0	0	0	0	0	0	0	0	318	390	43	24	344	0	0	0
ce008271892afa50ce8ce49cc0bd3f13	125	116	0	0	253	28	74	122	122	74	0	92	0	0	0	0	0	0	0	0	0	0	0	0	0
ffcf791ac7fc2e278c21da4662ca1bbd	0	0	0	0	0	0	0	0	0	0	0	0	6	0	3	8	0	78	131	77	533	94	4	0	0
7ff6a29105aa6598eb27459727e737dc	60	0	0	3	16	36	23	19	38	20	32	31	0	0	0	0	0	129	47	208	29	131	0	0	0
f9512c23f88a786065e56a87f635ab52	0	0	67	57	10	5	0	20	8	23	8	0	98	140	79	83	109	21	8	32	0	36	65	114	40
1c02f582091d1ff55d9eaeaa7c6891ee	0	0	8	0	0	198	48	0	0	7	0	0	121	0	103	24	0	0	10	0	0	0	184	344	37
b8e272f1e41bcb8d4011834e6af213f1	0	39	31	42	20	6	19	0	0	0	0	0	204	93	169	221	49	25	23	13	0	10	15	15	23
59429090e84346d410afefbd97702163	0	0	36	0	35	0	0	0	66	0	0	72	84	125	299	55	136	0	0	0	0	0	0	0	35
f1ec7d603f748858a750578afebe7e2b	184	65	0	0	45	96	371	0	0	0	14	0	0	0	0	0	0	10	0	0	0	0	0	0	0
752d1e1fc2e91bac3f07b8d7012b115b	0	0	0	0	28	0	0	26	22	14	44	17	11	0	0	43	6	279	52	230	0	130	0	0	0
91a5018f4658bc8f824f4f01c001f5ca	0	2	36	13	0	20	9	12	4	26	6	3	182	60	88	259	79	15	4	0	0	7	59	127	37
47759195292faec9eaf13b54a3d6a224	0	0	0	0	0	0	0	0	0	0	0	0	0	0	0	0	0	156	240	166	138	197	0	0	0
d622bd9fcb9c8ff3f9643bad170bee9a	0	0	0	0	0	0	0	89	109	311	0	36	0	0	0	0	0	0	0	0	0	0	0	0	0
f8ddd6facf2802b88d442d34793ebd77	0	32	26	58	26	18	58	71	123	110	114	87	0	0	60	19	0	0	0	0	0	0	70	56	0
c166c33c78b2c6b34140a8153da02fb8	0	0	0	0	2	0	0	0	0	0	9	0	0	0	9	0	18	72	203	455	48	81	0	9	8
f7d7e6fb55a9b657ef1e2357f137c0f1	0	0	0	0	95	0	0	0	0	0	89	0	231	0	0	115	0	103	0	0	0	157	63	0	0
905626bb5c5392d3d185ef1c72379baa	0	0	57	63	0	0	0	0	0	0	0	0	0	138	105	151	195	0	15	33	0	0	92	29	96
cf8c508814bfbbee4b4386b488f78c03	15	0	0	0	20	25	0	29	13	39	55	17	11	0	50	52	79	103	197	298	0	0	0	0	0
65cb09f6d2989ddcb19b6ea2e7073468	0	0	127	52	0	0	0	0	26	0	12	38	110	23	73	139	23	26	27	14	0	20	85	99	42
d3839c3ed1fb864b3c34ee36b48d2ffc	0	6	78	71	12	0	11	0	19	18	23	16	76	40	37	68	75	41	14	35	0	36	65	105	64
a065f9ea6394de1f14ca5f63edb98d77	0	0	0	0	0	0	0	0	23	0	0	0	0	0	0	0	0	165	268	129	96	240	0	0	0
d3d397b9f52b813d25bd32d6d147537d	0	0	0	0	0	0	0	0	0	0	0	0	0	0	0	0	0	151	155	123	188	150	0	0	6
65d9a20cf74df5de24068222d1c2c537	0	0	169	144	0	0	0	0	0	0	0	0	80	0	93	0	58	40	0	31	0	26	82	124	66
9548ad2e5b899b04e043d8b4a5be0ee0	0	0	134	59	0	0	0	51	38	67	60	49	0	0	0	0	0	71	60	104	23	82	38	10	67
31522d08a69261dc12f7da56e258f1af	46	0	0	0	107	471	36	149	0	0	173	0	0	0	0	0	0	0	0	0	0	0	0	0	0
22b01a3688c70b585d88bef10be4fc41	0	0	0	0	0	0	0	32	198	27	5	133	0	0	0	0	0	0	0	0	0	0	0	0	0
2629f2afddd8222dba9b8510e3b13bff	0	0	87	125	0	0	0	0	0	0	0	0	136	53	0	65	0	0	0	0	0	0	217	151	99
ed3eb195efd0c4f79b94a5f5ca208bac	43	248	0	0	343	57	0	44	8	100	0	8	0	0	0	0	0	14	0	19	0	0	0	0	0
dabad2c7247867d3790b71e9dc1fd765	19	17	49	36	14	36	0	0	20	0	22	0	81	89	49	53	30	43	9	50	0	17	69	104	54
d48b83bdedf1878228c90988b228a243	0	45	0	0	0	0	0	270	9	536	84	0	0	0	0	0	0	0	0	0	0	0	0	0	0
1e8217f3e6eaf0c02d08c57f0e8cced9	0	44	113	60	28	0	57	17	0	14	0	0	96	56	72	81	42	0	0	0	0	0	61	76	45
eb87f04bf4e97c951bf30e7c398465ef	0	20	17	36	50	43	33	53	19	19	18	37	54	27	61	0	20	56	37	22	31	26	21	63	36
6724c390cb160aa61a7609d8c890c1de	54	156	0	0	45	0	108	0	75	0	86	52	0	0	0	0	0	0	0	15	261	60	15	0	0
7466a937df6d1ebca43af6fc591da892	0	0	81	71	0	0	0	0	10	0	0	0	81	49	51	60	66	41	44	0	0	0	163	33	75
c9f5d01f8ab219540bff7911f2eab924	0	0	0	0	0	0	0	0	0	0	0	0	0	0	0	0	10	140	116	136	180	138	0	0	0
5026588811ce581eee4e144095c1320b	0	74	0	0	34	18	46	85	128	38	211	203	0	0	0	0	0	0	0	0	0	0	0	0	0
4cee6a906cef761895148c10ea3582ca	0	7	136	222	0	0	0	0	0	0	0	0	101	46	64	0	46	0	0	0	0	0	59	111	41
5560bd9b9cd8f4cc16111eb9d74f6336	77	73	0	0	516	124	0	0	0	0	0	15	0	0	0	0	0	30	0	0	0	20	0	0	0
99cb81095149e24e5b51dc8aca7ced07	0	45	0	0	17	0	0	293	41	124	314	14	0	0	0	0	0	0	0	0	0	0	0	0	0
474d3d74a0d1f2cfb6c574a842cd8c2d	18	0	17	12	125	33	8	82	21	18	347	28	0	0	0	22	0	0	0	0	0	0	30	70	18
2d8382265a1dcf43e7c06f540a92a0bc	0	25	0	0	137	17	58	43	12	14	76	0	0	0	0	0	0	50	101	35	39	79	0	0	0
9580308b308c6dfd3874b17e5dd991e9	0	0	92	74	0	13	0	0	0	47	0	0	63	30	75	29	95	0	0	0	0	0	90	71	114
7cbb77f56ac4a9a827041276105a8024	0	0	0	0	0	30	0	0	0	0	0	0	423	104	27	27	0	73	17	27	0	98	0	0	0
3edbd28880be18f8201cad60d32d3ae4	0	0	0	0	2	0	4	0	0	0	0	0	19	92	50	206	8	97	87	38	4	63	70	4	4
51ea49cbf94ff1e3d63ef881665ed729	78	89	0	0	113	52	37	71	35	39	91	28	0	0	0	0	0	24	69	68	0	30	0	0	0
66619dc062d80fb774e7df1ec7526707	0	0	80	199	0	0	0	0	0	0	0	0	0	0	0	150	0	0	0	0	0	22	212	168	58
bc6eff7080ab657d1e14ea9ff8fa90ce	37	48	0	0	78	235	33	36	28	0	37	24	35	47	0	53	52	19	5	20	0	11	0	0	16
145eb8a723053db799ed16f885eff1c6	0	0	69	34	0	0	0	0	0	0	7	0	201	43	19	163	45	85	45	28	0	60	7	15	11
6682c8803bb083b65a301013efd17691	0	344	0	0	0	0	198	0	147	0	0	114	0	0	0	0	0	0	0	0	0	0	0	0	0
7e025c475f1a940b8e9bfac5ac51e4dc	0	43	106	95	81	6	43	0	5	12	3	5	0	0	0	0	0	35	29	147	87	25	24	44	16
beefe08431f5c81511a80c15c202b03b	0	25	14	10	12	0	0	0	0	0	0	0	60	0	0	491	0	0	0	0	0	0	95	0	153
898ff8589020a0cf6f8d4b98c7e08481	0	4	0	9	0	0	0	0	8	33	4	10	0	0	0	0	0	110	148	106	69	166	0	5	9
2690f02d994980cd40c7643065e4344e	0	0	76	75	0	130	4	0	0	0	0	0	47	0	0	0	0	38	64	42	44	52	71	10	4
6784b8ff2251eca79e81b7582c57b3bc	39	51	0	0	208	46	97	19	37	37	35	19	0	0	0	0	0	20	28	26	0	22	0	0	0
e4fe27ac6bc30f5f0eeafb355861817a	52	19	0	0	129	27	52	0	0	26	52	0	0	0	0	0	0	52	85	35	0	79	0	0	0
ecd6a87484953d8d0474304a8af93661	0	0	0	0	0	0	0	0	0	0	0	0	0	0	0	55	0	264	232	75	43	152	0	0	0
49598ee3ef55ddf776d3c3efc2d93e24	11	0	15	20	0	0	19	0	41	19	21	34	44	36	0	93	0	61	112	58	22	54	10	20	0
d2ffbb435fc901add7ff8ae5d5c51b2b	35	0	17	29	52	0	21	0	50	25	0	57	0	31	131	33	86	0	0	0	0	0	33	24	24
2b9aa21d7fc3464f42cedd649cdcb51d	0	0	0	0	62	0	0	0	0	0	0	0	0	391	0	364	6	0	0	0	0	0	0	0	0
aafc8991bdcd2730e17e4400e7f7083d	0	0	38	13	0	0	0	0	0	0	0	0	58	41	39	54	56	28	7	0	2	16	171	81	97
57bede056dee96d0d6b08bdcb7e6497c	0	0	0	0	0	33	0	0	0	25	0	0	191	126	59	152	99	0	0	0	0	0	46	0	48
9158ab694988e84ec137cfaee88fcd2a	72	0	27	74	34	39	27	0	0	0	5	0	60	19	0	0	37	4	0	0	0	0	16	38	20
7ff417e014273bccad3a4449045ccb72	0	82	12	0	319	243	51	0	0	9	0	0	11	0	0	12	0	0	84	0	0	0	0	0	0
f47b068d01f1d5608b45b110a55065ba	0	0	0	0	0	29	0	0	8	9	0	19	73	218	0	101	109	0	32	0	7	0	0	128	78
9b7e0f0b54f02bb81c2c1feaa139079b	23	19	90	291	53	44	74	0	0	0	7	10	0	7	0	9	0	0	0	3	5	0	37	9	3
24fa72ef154198c5729ead3824e1093f	12	9	80	90	15	19	59	0	16	25	0	36	89	0	16	23	70	58	35	37	0	31	30	0	0
788b3f6fce8d03f3d2db41b588f52b58	0	0	0	0	0	0	0	0	0	0	0	0	0	0	0	0	0	122	132	90	118	148	0	0	0
fa665d92a18b9137354fedd6bc26d3dd	0	0	15	12	0	0	0	0	0	0	0	0	24	25	0	77	14	95	11	164	0	97	99	74	7
5603df2bcd77c36eae991cecdf7d3345	0	0	63	47	21	6	41	0	0	22	0	0	45	72	0	74	48	7	0	28	0	0	54	69	80
d1046f6363642028a00a52c29a57e454	0	0	0	0	0	0	0	0	0	0	0	0	0	0	53	0	0	0	0	0	0	0	247	13	204
663c05fce31677a4684c526848903a36	0	35	4	0	8	10	53	83	104	77	164	128	0	0	0	6	0	5	2	2	0	0	0	0	2
a61360801e1f86b42c1570681c366d48	0	0	0	0	202	0	38	0	49	0	0	9	0	0	0	0	0	153	27	45	0	132	0	0	0
6226b03df8099ea48fa07eadece22ad1	0	8	35	30	0	37	6	0	12	0	0	16	29	57	14	18	30	58	16	42	0	25	49	97	116
e58988ee90a1cf289f29e11f9076c2b6	0	0	96	32	0	0	0	0	0	0	0	0	29	78	51	123	78	0	21	32	0	12	86	66	38
f3ecc9d67fd511c88874443580ea6b8e	0	0	0	0	0	0	0	0	0	0	0	0	0	0	0	0	0	426	0	24	0	276	0	0	0
ff8c341eea6b9fca02122ec822d78834	0	0	0	0	0	0	0	0	0	0	0	0	0	0	0	0	0	124	131	102	133	128	0	0	0
093d7847f33cda5d4783dbd3bf026a23	23	135	0	0	23	34	0	0	59	22	0	55	0	0	0	14	11	143	31	51	0	130	0	0	0
db5083fb7a9c2edf1956b52b73a8edda	0	0	15	24	0	0	43	0	0	0	0	0	116	73	163	7	54	0	0	29	0	0	64	66	44
37bcf85b1d1fa4ea30083908e20f0c43	0	0	45	37	0	0	0	0	0	0	0	0	0	0	0	0	0	0	0	0	0	0	257	443	0
321c2bc0277ba5617d68b6bfd0c0e80e	0	0	45	33	16	19	43	0	0	0	0	0	66	55	17	41	96	58	42	60	0	22	0	48	15
8c160916bba9a860adec0e3b1185330e	0	0	0	5	0	64	23	0	0	0	0	0	0	0	0	0	0	136	104	94	0	147	0	0	0
2f7b19b490094c190d07819b8c304924	0	12	26	16	33	5	10	0	29	110	0	23	0	0	0	0	0	49	49	0	0	15	36	133	38
e60a1b18a29616f8d18b108040983e13	0	17	0	0	22	0	0	0	0	0	0	0	0	0	36	0	0	130	76	80	132	119	0	0	0
5249c6dc1ab79aee8da5a839f8a87e18	0	16	0	0	0	0	0	0	0	0	0	0	0	0	0	0	0	103	34	560	0	38	0	0	0
c1c6c2cdfa12644e4e569fc34d7eb6d4	0	0	0	0	0	0	0	0	0	0	0	18	0	180	78	79	0	65	0	0	0	0	87	100	0
b7563644fdabedd89b31cac9c326f9f7	0	0	0	0	0	0	0	0	0	0	0	0	0	0	0	0	0	169	272	54	0	271	0	0	0
eef57a10e28f220832bdd9bf19ca3ff5	0	0	0	0	0	0	0	0	0	0	0	0	0	0	0	0	0	300	183	87	42	104	0	0	0
9dbb29468a5395a903f0dd1b4105e500	0	0	0	0	0	0	0	0	0	0	0	0	0	0	19	0	3	282	99	80	0	245	0	0	0
dd695472d05d27fea430276f5542954e	0	0	0	0	0	0	0	0	0	0	0	0	0	0	0	14	0	80	69	51	210	153	5	0	0
1bc30d9bc229c740fc402f36e26e418e	0	67	0	0	0	0	0	0	0	0	0	0	0	0	0	0	0	92	91	105	135	94	0	0	0
e9616da2db8438a4449b605d41bbe6d2	0	0	47	48	45	0	29	0	0	30	25	11	42	27	49	61	86	0	0	0	0	0	38	100	53
157fb41fcdf922d2991c3c130f9dda2f	0	0	35	19	7	0	0	27	7	0	20	0	29	89	98	141	76	0	0	0	0	0	88	7	48
452e795c02fdae61b8f6c01ce564e14e	0	0	0	0	0	0	0	238	0	0	490	0	6	0	0	0	0	0	0	0	0	0	0	0	0
028b3e2a2954e4f856f9be95ef5e6759	0	56	44	40	65	7	31	0	35	0	65	39	12	31	62	62	11	0	0	0	0	0	14	41	14
f0dddc53470e0a0f58303e30bed482f5	0	0	30	29	0	7	17	0	0	0	0	12	67	72	143	97	187	0	0	0	0	0	24	23	0
7d7888f4554ec0ebac67a232e1800626	0	0	56	36	8	0	0	0	0	0	15	0	8	8	24	24	95	0	0	4	0	12	14	185	129
a72d35df784b586c637117940ee48f25	0	0	19	14	0	0	0	0	0	0	0	0	0	18	0	97	13	0	0	0	0	0	108	117	115
88c28ef5a9d7cf0be023916e17c78ef5	0	0	0	0	0	0	0	0	0	0	0	0	0	0	0	0	0	121	173	80	0	157	0	0	0
da8b4e3322c5f448dd1920256d0f7494	0	14	29	32	31	19	23	32	8	43	34	31	19	31	22	29	37	30	25	31	0	13	26	24	22
4adf556019ec78dcbda0f4673624d88a	0	0	0	0	0	0	0	0	0	0	0	0	0	0	0	0	0	137	82	147	122	83	0	0	0
8ce111f6a6ed441e2b0fbe0b19c01ba9	0	0	462	254	0	0	0	0	0	0	0	0	0	0	0	0	0	0	0	0	0	0	0	0	0
8de013940c0887e172a8b68fb364ce63	70	8	0	0	0	0	0	0	0	0	0	0	0	0	0	0	0	73	78	93	77	49	0	0	2
0f5dfe421363541834dd23e74150ff2b	48	78	0	4	35	34	101	54	55	90	36	24	0	6	0	6	0	13	0	0	0	0	9	0	0
6aa09df1f776fc561b3858aa72921b83	0	0	17	0	0	0	0	0	0	11	0	0	36	0	0	26	0	54	110	83	105	100	0	0	0
5556388c13ce3c501de4589d7779702c	71	0	0	0	9	0	0	0	0	0	0	0	0	0	0	0	0	84	73	100	0	80	0	0	0
99a580b80b265bcb92a719943bc417d6	0	0	0	0	0	0	0	0	0	0	0	0	0	0	0	0	0	122	118	104	0	178	0	0	0
451c793d499ea13f6e76be75937541cf	0	0	0	0	0	0	0	0	0	0	0	0	0	19	0	0	24	88	86	74	113	110	0	5	0
503e4512cf8f4dbf0544f5330aced478	73	111	0	0	70	349	0	0	0	0	0	0	54	0	0	0	0	0	0	0	0	0	0	0	0
f193a2b17b760d61798f2804d9048618	0	0	12	9	0	0	0	0	155	0	0	20	11	17	0	10	0	0	7	0	12	22	22	12	22
9bbd264c9042fffbb9c2988d60739815	0	0	0	0	0	0	0	0	0	0	0	0	0	0	0	0	0	9	0	61	259	0	0	0	0
2111a3129f4d8391acd5199b42e68ae5	0	42	31	24	36	25	25	55	40	12	153	22	20	34	0	38	23	22	14	0	0	16	13	0	0
7f40971a6239e131d34f45e58a9865b0	0	0	110	113	0	0	0	0	0	0	0	0	0	0	0	0	0	0	0	0	0	4	131	211	46
0239bd3c001898205aa0677b8d600454	0	0	0	0	0	0	0	0	167	0	0	60	0	0	0	0	0	0	0	0	0	0	0	3	0
a9dbeca547e6c50c35ca26b0c325d2ec	0	29	62	56	57	12	19	0	0	8	0	4	11	31	34	62	30	0	0	0	0	0	41	139	16
7126929edc923ad7f62448a53d72fa45	0	0	0	0	0	0	0	0	0	0	28	22	0	0	0	0	4	103	154	77	50	140	0	0	0
de39af1ab6bd774241f46514585e2bff	0	0	0	0	9	0	0	10	0	0	8	0	0	255	39	93	241	0	7	0	0	0	0	0	0
eb2d3d6cf2ce45924ad25c5d26970974	0	0	0	0	0	0	0	0	7	0	0	0	186	82	139	34	81	0	13	8	24	29	0	0	7
31eea30d3efdf5c88dac0f8ec3488870	37	30	58	115	55	23	0	0	0	0	0	0	0	0	0	0	0	56	0	40	0	32	0	31	3
206e03dcfc6c88d24765b95a9111b55d	0	0	243	176	0	0	0	0	0	0	0	0	0	0	0	0	0	0	0	0	0	0	29	136	54
b0360b32f913835b6df94a7e48872cc9	0	0	0	0	0	0	0	39	0	0	123	0	214	0	0	149	0	0	0	0	0	0	34	0	8
a95d1014bd5a2d2e4a20cf5b7ea8fe8d	0	0	205	92	0	64	87	0	0	0	0	0	0	0	0	0	0	0	0	0	0	0	122	0	0
da1dbaa408f3ce3c0ca87606553efbbd	0	0	0	0	0	0	0	0	0	0	0	0	54	19	0	3	0	0	0	0	0	0	0	0	0
ac3a9126094bc82682fde7107c60e5dc	0	0	38	0	15	0	0	0	0	0	0	0	37	83	0	30	79	44	38	57	0	63	39	23	62
62ae8991978ec26bb97582334b66261a	0	0	61	21	0	0	0	4	0	8	0	0	0	34	0	112	0	149	77	72	0	58	6	12	8
44c4aff0e34afafdb5bff287358fb37d	0	0	0	0	0	0	0	46	143	113	29	197	0	0	0	0	0	0	0	0	0	0	0	0	0
bbb22b30f996a34d983e72fbbb9fc7b7	0	6	140	105	0	0	0	0	0	0	0	0	108	15	0	0	92	0	0	20	0	0	0	43	38
8224d93ae5545efb9b1431cb01f48f7d	0	0	0	37	19	0	0	0	0	0	0	0	69	24	65	0	0	36	55	51	30	38	0	48	35
26d2289c9980139c2f3342a8904991a2	0	0	0	0	0	0	0	0	0	36	0	0	0	0	0	0	0	102	111	97	20	125	0	0	0
44744536282c4c14eead47a630786a4a	0	6	18	19	37	37	0	10	6	18	34	8	50	44	21	45	16	52	21	51	0	15	10	45	15
fdff2e0437f1eca73dab1321ba2189d0	0	0	384	219	0	29	0	0	0	0	0	0	0	0	0	0	0	0	0	0	0	0	0	0	0
552a91e70d1ab6bcfd2d5d4259f133e3	0	6	54	55	29	8	13	0	0	0	0	0	11	31	44	58	19	11	4	10	0	7	38	120	57
7763bc1d7c0b388acc5955e7ac6bce25	0	83	0	7	16	27	188	0	0	0	0	5	0	11	0	0	8	6	0	6	0	0	0	6	0
b6afae30d771b0023fb3abd056db8ac1	0	0	0	0	21	348	0	30	54	53	53	28	0	0	0	0	0	0	0	0	0	0	0	0	0
d49c957eeaec601dc6af8a3eda911cc2	0	0	0	0	0	0	0	0	0	0	8	0	0	0	0	0	0	0	83	89	132	121	0	29	0
12c7e4a791ad177d4ab4e01b710ecd59	0	0	0	0	0	0	0	0	0	0	0	0	101	0	125	0	126	0	0	0	0	0	0	79	0
c913efa04b9a08355a2568f5c0216794	0	85	97	74	111	27	0	0	0	33	9	0	0	0	0	0	0	20	19	0	0	32	13	0	0
15a8a885864bd8c25734344145b5fb17	0	0	0	0	0	0	0	0	0	0	0	0	0	0	0	0	0	110	98	74	0	106	0	0	0
917ad1d99fa43fdb71925a1c63e9823f	0	8	0	0	0	0	0	0	0	0	0	0	159	132	33	159	0	0	0	0	0	0	46	24	0
84d1a8c7e1bb523829e3322efbd36ef4	0	0	25	12	15	27	3	0	0	0	0	5	122	36	51	31	20	41	39	0	0	37	19	26	17
d16c5e89f3e6d3ef474f4c658ee0e8ba	0	0	115	51	0	0	0	0	0	0	0	0	0	0	0	0	0	0	0	0	0	0	89	183	44
8665e32adbd37215d1e592fe81d5a60e	0	0	9	9	18	0	0	0	18	6	11	22	249	82	0	58	59	0	0	0	0	0	5	0	45
189abfbbe325aac75acb96dae68eeb4e	0	0	0	0	0	0	0	0	0	0	0	0	0	0	0	0	0	123	359	39	0	83	0	0	0
098ba14af0b560cc1e38484d724486b4	0	0	0	0	0	0	0	0	0	0	0	0	0	54	67	187	41	0	0	0	0	0	229	0	0
01df6faf16ed415142bba71031d78e78	0	0	0	0	0	0	0	0	0	0	0	0	79	26	0	71	29	40	59	70	89	32	24	0	0
9f777d99c764a7996e9804cdcc2d1add	0	75	0	0	38	0	67	0	0	0	0	0	0	0	83	53	64	0	0	0	0	0	0	0	0
0e8f7db4449eb4d45ed98931888b76ef	19	0	33	78	0	0	0	0	0	0	0	0	57	36	0	46	41	30	53	68	27	23	0	32	0
8e12fc38d306689ea433fb8966ff80e9	0	11	21	16	0	0	0	0	30	0	8	16	25	31	28	132	0	117	0	14	0	41	12	22	20
7ac6c13a243f83d7549a9b9236d8a171	65	117	0	0	60	0	159	0	0	0	0	0	0	0	0	0	0	0	0	0	0	0	0	0	0
ab2c864cb4df4aa10ed532b95c2770c7	0	0	0	0	0	0	0	0	0	0	0	0	0	0	0	0	0	109	85	86	95	96	0	0	0
9a24516dd83e38166f1dabc8684d4e6f	0	0	0	0	30	0	27	40	105	91	58	106	0	0	0	0	0	0	0	0	0	0	0	0	0
36a06e579dca73c12aa4bb68102b710e	0	7	43	66	8	17	12	15	8	28	15	8	19	12	9	0	28	0	0	0	0	0	34	74	28
32b461bfe886de5d87013779eace6cbe	0	0	0	0	345	173	41	0	0	0	0	0	0	0	0	0	0	0	0	0	0	0	0	0	0
eebedf9dd21e0d14c2f8bdbf6a157319	0	0	0	0	0	0	0	0	172	0	60	180	0	0	0	0	0	0	0	0	0	0	0	0	0
4736eb467d1d9ac3c2320d39b4eb983d	0	0	0	0	0	0	0	0	0	0	0	0	0	0	0	0	0	93	166	89	41	136	0	0	0
00b8914f01b0c6a32672da52af712059	0	0	0	0	0	0	0	0	0	0	0	0	254	0	73	72	46	0	0	0	0	0	0	129	0
70b7d1f2b531de9e803e1d985ca3d333	0	0	0	0	0	0	0	177	0	0	392	0	0	4	0	0	0	0	0	0	0	0	0	0	0
803f9f47394b11d81287e2a4e491d127	0	28	34	0	0	22	0	0	21	26	41	0	18	18	0	37	41	28	0	18	0	36	20	33	11
f6c0191dd254cf759f92880b9f581361	0	0	170	110	0	8	16	0	12	86	0	19	16	13	0	0	0	8	0	0	0	0	32	43	10
b9a788058ee68a5de44e474dbc8f94c5	140	12	0	0	0	35	12	26	0	48	0	0	0	0	0	0	0	0	0	0	0	0	0	0	0
f4bed9ef514bb3e74f43cd6bf377c59c	0	0	0	0	0	0	0	0	0	0	0	0	0	0	0	5	0	43	23	394	0	24	0	0	0
93fb895de49bdefd1954ee42e0e02dee	0	0	0	0	0	0	0	89	7	118	136	0	0	7	110	26	39	7	0	0	0	13	0	0	0
77a2eadca13a909a71d3faf340f064ec	0	0	0	11	68	42	17	0	0	0	0	80	55	23	0	0	0	24	61	11	0	0	0	15	77
fe50728b7c99f279181709129e6233f2	0	72	27	26	97	24	0	0	0	23	0	0	89	73	26	44	0	0	0	0	0	0	0	34	0
79d2482c1a391bd62dda24794679dd0d	0	0	0	0	0	0	0	0	0	0	0	5	146	68	56	173	87	0	0	0	0	0	0	0	20
41b32ffbac3f7964b9199c2b71492e14	0	0	13	12	0	0	0	0	0	6	0	0	4	172	0	5	0	42	5	8	0	37	7	10	92
a0f61f77a54a8c274d9b381cacaf7008	0	0	0	0	23	305	0	60	26	29	54	50	0	0	0	0	0	0	0	0	0	0	0	0	0
9cf489445c63f815ba1b794a08078052	0	0	53	53	0	0	0	27	18	19	7	25	47	53	22	0	22	17	0	0	0	12	0	67	42
6824dc6fe577acb6f7b8819a715d768d	0	0	0	0	0	0	0	0	0	0	0	0	0	0	0	4	0	0	0	0	0	0	0	0	0
ca223d8117486e173ef50bdb05fdc731	0	49	0	0	274	42	0	0	0	0	0	0	0	0	0	0	0	0	0	0	0	0	0	0	0
4a7a703a721c1ba8a17dd551e26c3758	57	112	0	0	34	52	55	31	16	8	62	0	0	0	0	0	0	0	0	0	0	0	0	0	4
959b75f79b7491aceb1bb584a4b4111d	0	0	61	48	7	48	0	0	0	0	0	0	0	50	18	17	19	27	19	15	0	12	39	50	36
d8f7025957edca9f036c13cb9601e2f1	0	0	122	89	0	0	0	0	0	0	21	0	0	17	43	49	71	16	0	0	0	0	54	0	0
5c2237126ec7183a15dfc2151e803278	0	0	0	0	0	0	0	0	0	0	0	0	101	0	33	27	88	33	0	0	0	27	33	130	16
31cdf82d26cdc7e8a54626da556926bc	103	48	21	14	23	72	42	0	0	0	0	0	0	0	0	0	0	12	13	0	0	0	0	0	0
1d6b47c9b2643dd75ceb92cc17656ee6	0	0	41	43	4	11	0	0	0	0	0	0	57	48	68	111	15	0	0	0	0	0	29	0	6
0efbeb8b37e336c40819cb4e9d32e130	36	88	0	0	42	22	222	0	0	0	0	0	0	0	0	0	0	0	0	0	0	0	0	0	0
16807b3f821fc0d73d483a447ce5565e	0	21	0	0	103	32	45	83	0	192	0	0	0	0	0	0	0	0	0	0	0	0	0	0	0
810d71dd24cf368163d4eaea56406e20	0	6	57	37	0	0	0	0	16	12	15	13	21	70	89	54	42	0	0	0	0	0	17	20	0
08954f2de2c8ca3ddcd72a476c880576	0	13	52	36	0	0	0	0	21	0	32	16	32	36	0	0	21	10	0	0	25	0	73	51	27
77272b3e7f1eaca3606ee63024e3fcd2	0	23	0	51	0	30	14	0	0	0	28	0	18	23	0	35	23	31	15	0	52	39	36	33	0
29311e0a0c9f4eb931bc1cee5d66d4ae	0	0	0	0	0	0	0	0	0	0	0	0	0	0	0	0	0	0	0	0	0	0	49	367	0
2c5981221bc2d0d66e4d116f025c8a61	0	11	0	0	0	6	18	0	0	0	0	0	51	0	0	0	27	98	44	65	0	60	0	9	6
e833f7b757232865396bee33c5145728	0	0	0	0	0	0	0	47	52	125	57	50	0	0	0	0	0	53	53	0	0	0	0	0	0
b557781f2e9948742f2e4ea3f8b8d26d	0	6	0	0	23	0	29	61	43	53	67	56	0	52	0	25	0	0	0	0	0	0	0	0	0
2edf4f20df823c2137c1f26959824823	0	0	25	0	0	0	0	0	0	0	18	8	75	32	22	31	12	0	0	19	0	8	50	76	54
137dae45b6f7dafa9893c3e3aa65809c	0	0	72	59	0	0	0	0	0	0	26	0	15	0	0	22	0	0	0	0	0	0	69	71	31
d76fb990768c49e8239454f2e949152b	0	0	0	0	0	0	0	0	0	0	0	0	41	0	377	50	0	0	0	0	0	0	0	0	0
47b53210bc62338d4d9a945d26d6b481	0	12	27	36	17	0	0	0	0	0	0	0	58	0	38	99	30	0	0	62	0	0	59	19	27
49e10a4efc1e452e28b61152e63abf0e	34	73	13	16	19	17	40	27	22	24	0	35	0	27	27	27	13	0	0	0	0	0	0	25	9
a9a3dee797d548a51918401317ae68e2	0	0	0	0	0	0	0	0	0	0	0	0	0	481	0	0	0	0	0	0	0	0	0	0	0
6748770dd830a47ce941f1ee404144a7	0	0	0	0	0	0	0	0	0	0	0	0	18	0	16	13	4	64	184	120	0	26	0	0	0
463fdf9725cf45e2b64350b7fa3097ba	0	0	51	73	0	0	0	0	0	0	0	0	0	0	0	0	0	0	0	0	0	0	56	121	73
621686dac3d38b42ca612ef5cb5c887e	24	42	17	19	61	16	56	4	28	14	6	20	19	9	19	12	15	0	0	0	0	0	5	5	0
b9d432f76ff71a5e316265afa6c25758	0	0	17	7	0	3	10	0	0	0	0	0	19	23	0	13	39	23	9	0	0	10	71	153	29
f9cae6bf5dcb794500ab94c4588bcfc8	0	0	0	0	0	0	0	0	0	0	0	0	0	0	0	0	0	222	66	21	0	149	2	5	0
7219c101408188477f5904628c16803b	0	0	0	11	0	0	0	22	12	32	19	0	167	6	0	86	32	17	0	5	0	0	8	19	14
e0750a721554942c73632b3a3fc5b5ee	19	18	0	27	21	23	22	0	13	12	7	17	22	16	0	12	0	27	19	11	11	18	14	23	30
e692fcf963c630541c141757c5eb197a	0	45	28	29	38	30	39	0	0	0	0	0	0	0	26	22	16	29	20	38	0	0	0	0	0
223217a350ce94515daf7262e1e9cc71	0	0	129	122	0	0	0	0	0	0	0	0	0	76	0	0	0	0	0	0	0	0	0	0	57
0a84a91a9c24a635acc70a4f0b7a8fa5	0	13	0	32	24	12	0	0	11	0	18	0	17	0	0	0	0	47	182	39	0	21	0	0	0
86370d79b6a2d0db505c3d9ed1a8e060	0	4	0	0	6	0	0	0	183	2	0	193	0	0	0	0	0	14	13	0	0	9	0	0	0
35dc6145e97da30a6f6c7675244507f6	0	0	22	28	0	0	0	0	0	0	0	0	0	0	104	0	18	0	0	0	0	0	142	0	46
e46e19cfcea05bed80356cd05b5bc11c	0	23	20	23	18	18	18	0	0	8	0	0	42	27	0	29	11	10	6	17	0	0	32	49	42
777dd68b606758ba4b8810d87ed434e0	0	0	0	23	0	0	0	0	0	0	0	0	22	25	0	35	11	72	28	52	0	17	0	79	15
368a19cc64ef238cfdc7bffcdfef5fc8	0	0	50	75	0	0	0	0	0	0	0	0	19	17	24	17	16	0	0	0	0	0	7	59	10
98197d5d5ab056e6ba58ac826fbc46e6	0	0	0	0	0	0	0	0	0	0	0	0	0	0	0	0	0	123	66	41	30	80	5	64	11
bf4cad7782422a28944bbd2fda9c0a74	0	8	7	0	13	0	10	0	0	0	0	0	25	13	31	142	11	55	0	21	0	16	8	14	0
9eba3bc6f1fd5787a5f5dfd7bb7f9b93	0	0	54	70	0	0	0	0	0	0	0	0	26	0	28	10	24	0	0	21	0	0	29	87	38
b4269692327d65ced00672101a9c60d3	26	113	0	0	101	50	53	0	0	8	3	0	8	0	0	0	0	0	7	9	0	0	0	0	0
d6df1c53c3f3e9ed57afc154d28f4526	0	0	44	17	0	0	0	0	18	7	0	0	55	38	56	51	33	0	0	0	0	0	24	0	24
8b695d2f11e47ec47829930d45030dd6	0	40	11	20	51	25	43	0	39	12	0	22	18	7	22	9	17	0	0	0	0	0	0	0	0
7fd63df69ac0dce7e8724478e3ba855f	0	0	15	10	0	0	0	0	0	0	0	0	0	0	0	0	0	0	0	0	0	0	0	19	0
93abb956d5505585d4e02ef5f387cb42	0	0	0	0	0	0	0	0	0	0	0	0	0	98	171	65	83	0	0	0	0	0	0	0	0
4d158d81ee80d2fab77c9d2d99dc448e	36	9	0	44	16	7	0	9	0	8	41	0	35	0	44	9	0	0	0	0	0	0	0	43	0
32724d0334b4dca9e236558bd7be7754	0	0	117	51	0	0	0	0	0	0	0	0	0	0	0	0	0	15	46	27	0	29	0	53	0
616bfc7894e28436062a87b86a9cb947	0	0	0	0	0	0	0	0	0	0	0	0	0	0	0	0	0	85	0	239	0	82	0	0	6
111a03a987b1687db2a32cb65e1e6ea0	0	0	0	0	0	0	0	0	0	0	0	0	0	0	0	0	0	0	0	0	0	0	0	0	0
2ac1cccb682dc5233adfb621346026ce	0	2	27	16	0	3	0	0	3	0	0	3	21	24	0	43	24	0	0	3	0	0	107	66	40
31870b3b5326b75e7647b8efad7b7a5c	0	5	0	0	14	0	0	0	0	0	0	0	10	191	0	170	0	10	11	0	0	0	0	0	0
c1c8e73b9ca2eddeda94fdef8ff875b3	0	49	0	0	87	0	0	0	72	47	32	58	0	0	0	0	0	0	0	0	0	0	0	0	0
cbb2246bed7e6a7e05fc3be46df2f7d3	0	0	0	0	0	0	0	0	0	0	0	0	0	0	0	0	0	0	0	0	0	0	0	0	0
65dc2b58cd7f12c40edcd5844c10e529	0	0	0	0	0	0	0	0	0	0	0	0	0	0	0	0	0	69	54	105	0	72	0	0	0
b64e5f77de11e1612bb623944e01b3b8	0	0	0	0	0	0	0	0	0	0	0	0	0	0	0	0	0	66	68	54	77	73	0	0	0
fdc1bfd04b316ad296381ebd28405bf4	0	0	0	0	0	0	0	0	0	0	0	0	0	0	0	0	0	63	63	46	0	76	0	0	0
b6a974856df1137ba97fd56e9363922c	135	69	0	0	69	57	0	0	0	0	0	0	0	0	0	0	0	0	0	0	0	0	0	0	0
4f6ba46cb6e8a10b82e6eaf171192574	96	31	0	0	103	64	24	0	0	0	0	9	0	0	0	0	0	0	0	0	0	0	0	0	0
5fa5109dee4e1b9d60c5b5ba6bae18b9	0	0	0	0	0	0	0	0	0	0	0	0	16	219	20	20	0	33	15	45	6	16	0	0	0
1e9af93a45c36a3dccecf55e349654e0	0	0	11	12	0	0	0	0	0	0	0	0	0	3	65	0	0	28	47	96	0	12	24	40	16
ce15028784d5c23cac277c4876306996	0	16	6	20	33	7	0	0	0	0	0	0	4	5	0	28	0	15	0	0	0	11	4	75	9
0b5a2cec8c50ad01394e7f69a35a5bf4	0	0	0	0	0	241	0	0	33	38	38	0	0	0	0	0	0	0	0	0	0	0	0	0	0
ada02c1a5f9574b335d60afc50ef7026	0	54	0	0	87	207	41	0	0	0	0	0	0	0	0	0	0	0	0	0	0	0	0	0	0
363652c053efc170fc4c49496f117548	0	0	0	0	0	0	0	0	0	0	0	0	0	0	0	0	0	120	56	81	0	129	0	0	0
3b0e51768ed3bf41fa2068fc2b0a5cf0	0	14	0	0	14	0	0	27	67	53	49	54	0	24	0	21	27	0	0	0	0	0	0	0	0
a592cab6a7b7baa4f826fa8d958c47b5	0	20	0	7	0	18	21	12	18	31	28	20	68	9	21	26	14	0	0	0	0	0	2	3	0
13f8c773029afa77d14e83e18c81922d	33	28	0	0	79	5	27	12	27	39	25	27	0	0	0	0	0	0	0	0	0	0	0	0	0
b3d9cd2f0d8b97cd251bc0d7be245e0a	37	0	0	0	121	10	0	54	32	0	52	46	0	0	0	0	0	0	0	0	0	0	0	0	0
e4c6d32eb27ab23cf7310f3e49a2b4de	82	259	0	0	0	0	0	0	0	0	0	0	0	0	0	0	0	0	0	0	0	0	0	0	0
f1d866d1e4968f5802ad3bd10f08964b	0	0	61	0	0	0	0	0	0	0	0	0	0	0	0	0	0	0	0	0	0	0	58	124	61
77099473d0cda3e8462d80d459f5e836	0	51	0	0	48	0	0	0	0	0	0	0	82	0	0	107	0	0	0	0	0	0	0	0	0
6054c43b51bfaf7343eab7cc514635df	9	5	15	11	34	25	0	24	5	0	36	7	13	11	0	5	4	52	9	33	0	28	0	8	5
81a74810bd4c824c37b3cf42fbbeac64	0	0	0	0	9	14	60	26	56	61	18	59	0	0	0	0	0	0	0	0	0	6	0	0	0
c1fddba693a3031941052610f2d765ed	0	0	41	0	0	0	0	0	0	0	0	0	71	0	46	35	71	22	0	30	0	19	0	45	0
65cda9896a0744ae726dda5511226b94	0	0	0	0	0	0	0	0	0	0	0	0	0	0	0	0	0	53	58	37	47	66	0	0	0
3182323d9121da220eaf38e5438f8549	0	21	19	0	8	0	0	19	25	21	30	8	0	5	20	24	29	0	5	0	17	27	23	0	15
9dff26151a1868393d3bd85a40c7caf1	0	0	0	0	0	0	0	0	0	0	0	0	0	0	0	0	0	148	122	11	0	91	0	0	0
11c6680d4e4d6ddc74152feb307f6190	0	0	0	0	0	0	0	0	0	0	0	0	0	0	0	0	0	0	0	0	0	0	0	0	0
b34ca943ee14b32217a0b9bbc8b895f0	0	0	0	0	0	17	0	0	0	0	0	0	0	138	167	0	28	17	0	0	0	0	0	0	0
d800d30963b0725aeb8c9ba4fb1686b1	0	0	0	0	0	0	0	0	0	0	0	0	0	31	0	53	37	0	0	0	0	0	11	45	86
6235a038e987a6eb8f2dcdf2f4bee979	0	0	24	10	5	3	0	7	0	11	0	0	12	23	4	26	21	10	4	0	0	0	19	88	59
ce018c3d44fcca8298a3d32376af0c36	0	6	7	9	16	23	0	0	0	17	7	0	36	0	18	29	15	26	19	22	0	16	15	42	13
693e843219d5f82dbe23cae86c193033	0	0	0	0	0	0	0	0	0	0	0	0	0	0	0	0	0	47	55	46	0	75	0	0	0
9f59d607fb258fe284848ed0f8a25782	0	0	17	16	0	0	0	0	0	0	0	0	7	10	48	26	6	5	14	6	0	9	15	73	29
47e1cd99205041c61f09de66e116df81	0	12	0	0	2	0	10	0	0	0	0	5	0	0	0	8	7	29	113	25	26	63	8	0	4
142513f65b67e89b8ef089f367b40f07	0	0	0	0	0	0	0	0	0	0	69	0	0	0	0	0	0	0	35	77	81	101	0	0	0
c60f579ece35f26a47a70086ec323e3e	0	0	55	30	0	0	0	0	0	0	0	0	0	0	23	34	0	8	0	15	0	0	64	67	26
425426c4913759eb2a3f28e83ebffc9e	0	0	27	29	0	0	0	0	0	4	81	0	0	0	0	0	49	38	2	0	0	0	2	35	0
f9b9dea06a99e887a2ed60e81a310e94	0	0	36	34	0	0	0	0	0	0	0	0	33	0	0	0	0	40	29	39	0	39	21	24	0
c35301a4916f49e783d0244521728b9d	0	0	0	0	0	0	0	0	0	0	0	0	134	26	0	94	63	0	0	0	0	0	27	0	0
bacac0682212c5632da56e494eee7344	0	0	0	0	0	0	12	0	0	0	0	0	0	68	0	12	0	0	0	0	0	0	229	0	0
c4d6c2a983281cffa7317ceb844f5a49	0	0	0	0	0	0	0	0	0	0	0	0	88	123	97	0	50	0	0	0	0	0	0	0	0
19b3bc88412dbf83701ef38a4f11f7b6	0	0	0	0	0	38	0	42	0	0	4	0	80	14	36	0	0	0	0	10	31	17	0	0	0
0e36340cf41849de5a679a50885c975b	0	0	0	0	0	0	0	0	0	0	0	0	0	0	0	0	0	38	61	39	0	45	0	37	0
5337fb4f96b129e5d63d4129fdebb13c	0	0	0	0	23	0	0	0	0	0	12	0	17	0	29	0	0	33	163	36	0	40	0	0	0
d615564b08f51f4143414c12a30360cf	6	3	0	13	9	10	9	0	9	15	15	19	25	16	0	10	11	38	23	0	0	26	6	6	0
d5fd07413c9a5b620aa5c5a24a4914a4	0	23	0	0	0	177	139	0	0	0	0	0	0	0	0	0	0	0	0	0	0	0	0	0	0
bdbc6f5d008218b17f769a403c7671f5	0	0	0	0	0	0	0	0	0	0	0	0	0	0	0	0	0	150	37	21	0	141	0	0	0
642cfbfdf852e09e3b8f8288a140b201	0	13	0	0	26	0	0	39	0	0	165	12	0	0	0	0	19	24	0	0	0	21	0	0	30
9f4d1f290881b4ea18c87b1dbb8d0689	0	0	43	27	0	0	0	0	0	0	0	0	44	25	21	17	28	0	0	0	0	0	31	58	33
74bf8c0b605d74d4ae6b85d82bd940fa	126	18	0	0	0	0	37	0	0	0	0	0	0	0	0	0	0	0	0	0	0	0	0	0	0
b971a4f1984dd2571a69119cfd75cf06	16	26	0	0	35	18	25	17	27	24	24	22	0	2	0	0	0	0	0	0	0	0	0	0	0
56aa91b83f97f0e967295d3f17554ed5	0	0	0	0	0	0	0	0	0	0	0	0	0	0	0	0	0	0	0	0	0	0	0	0	0
7775cd07c340f96f52cc7add8bcf20d9	0	0	0	0	338	0	0	0	0	0	0	0	0	0	0	0	0	0	0	0	0	0	0	0	0
03a9337ca44165d70f4e4c51e3ded4e7	0	9	14	0	21	8	13	0	0	10	19	13	11	12	0	19	34	8	34	17	0	2	14	0	19
a872d971676fe2e35e95f9c2d370b5cc	0	0	0	0	0	0	0	0	3	0	0	0	39	87	28	44	133	0	0	0	0	0	0	0	0
62f69eff18887663d5bfaec55aa314c3	72	0	0	0	0	40	0	60	10	16	57	13	0	0	0	0	0	0	0	0	0	0	0	0	0
9a988938a203ae3c6a829c760d86e00a	0	0	0	0	0	19	0	0	78	0	35	87	24	0	0	0	0	0	0	0	0	0	0	0	41
def36de8dec51de24e57ff436ccdbec1	0	0	0	0	0	0	0	0	0	0	0	0	0	0	0	0	0	53	112	89	47	0	0	0	0
ab3cf31107c8ea740673c3b2a0d657a2	28	29	19	20	17	21	18	0	0	0	0	0	0	0	21	16	18	22	18	23	0	0	0	0	0
e79bae91112a2345a567c86bb2bd0550	0	63	0	0	92	0	0	0	0	0	0	0	0	0	0	0	0	0	0	0	0	0	0	0	0
1ff70fbddf3ccd7c16a5fe7124baa271	0	0	0	0	0	0	0	0	0	3	0	0	0	0	0	0	0	183	7	58	0	63	0	0	0
c24f641132be3d0f494e864fc02386fa	0	0	0	0	0	0	0	0	0	0	0	0	0	0	0	0	0	54	121	90	0	37	0	0	0
0e746effb541f5124445820a569fb4bf	0	5	0	14	8	0	18	0	0	0	0	0	65	34	17	30	15	0	0	0	0	0	89	5	13
c561f884d2e3af4d67d30bdbe2454859	0	18	0	0	0	0	0	0	38	43	59	45	29	0	0	22	0	0	0	0	0	0	0	0	0
8ae6f1ef597cd1cac21004cb44362c2e	0	0	0	0	0	0	0	0	0	0	0	0	0	0	0	0	0	118	33	103	0	42	0	0	0
3b98f9d51ead6fc8da8f0e2cacd5f16b	0	37	0	0	5	9	23	14	47	35	53	33	2	0	0	0	0	0	0	0	0	0	0	0	0
0e5d875738134fdc5ecf592306f3bdfb	0	0	29	11	0	0	0	0	0	0	0	8	0	26	0	0	0	34	19	43	10	16	0	8	39
d3e5524d335fb0b76fb35b24e37d8337	0	0	0	0	0	0	0	0	53	33	67	35	0	25	41	23	19	0	0	0	0	0	0	0	0
a28be1b5ffe3caa246835ad63630881d	0	0	0	0	0	0	0	0	0	0	0	0	0	59	31	17	0	54	65	66	0	33	0	0	0
b75cbbfb3beb35c2cbfeefc8059a853a	0	37	0	0	96	154	28	0	0	0	0	0	0	0	0	0	0	0	0	0	0	0	0	0	0
f6f36948c2c69fd105e1c3415f9d065b	0	0	0	0	0	0	0	0	0	0	0	0	116	61	0	54	87	0	0	0	0	0	0	0	0
b88737a236a385f777b5b36beed51187	0	0	0	0	0	0	0	0	0	0	0	0	0	0	0	0	0	93	44	75	0	104	0	0	0
982aa22b57505146f9234502a9b24bb9	0	6	0	4	6	11	0	8	11	9	13	15	14	20	16	14	12	18	12	15	0	7	14	18	10
31649149c64d8667a57c8f34be5e3005	36	13	0	0	0	0	10	26	48	43	0	45	4	0	0	0	0	0	0	0	0	0	0	0	0
b74e42e3a9754b42bd7da1ace3de575d	0	0	9	7	0	0	0	0	0	0	0	0	0	7	0	28	0	111	48	0	0	100	0	0	0
1e5788b7d5320b2a8ce3b220a24878c5	41	25	0	0	53	88	14	0	0	0	0	0	0	0	0	0	0	0	0	0	0	0	0	0	0
2f61dd60c72d0b0d046be64e32871ea7	0	25	11	0	13	19	0	0	0	0	0	0	4	19	24	41	36	0	0	0	0	0	38	16	48
2fc4ef99c24aa5b54d15e4d4e5348400	0	0	0	6	0	6	0	0	0	0	0	0	22	32	21	17	17	10	6	11	0	0	48	79	11
240f5f1f107a6a4cb666bfddb1f042da	0	0	0	0	0	0	9	0	10	0	0	14	55	29	38	48	51	0	50	0	0	0	0	0	0
db45ecb68a7ac5510536515192cd8f9a	0	0	0	0	0	0	0	82	11	185	0	0	0	0	0	0	0	0	0	0	0	0	0	0	0
a02229b0924a08799b5133e302d5fe77	37	70	0	0	72	57	33	0	0	0	0	0	0	0	0	0	0	0	0	0	0	0	0	0	0
0808ec8f99f38eeb558e3dfed9e45885	0	0	0	0	0	0	0	0	0	0	0	0	0	0	0	0	7	0	11	282	0	0	0	0	0
621c2998179f9151c6a969970f9db2ee	0	0	49	92	0	0	0	0	0	0	0	0	0	0	0	0	0	0	0	0	4	0	5	39	33
ee0d083eef8ae955b6d0df95c010ef5b	0	0	7	6	0	14	0	13	6	7	12	0	9	33	24	37	8	7	19	20	0	0	22	10	25
2ccc79994d4ff4382540d5b0240dc1d6	0	0	0	82	0	0	0	0	0	0	0	0	0	104	0	112	0	0	0	0	0	0	0	0	0
256af0bc6f2561c14d3a7b170c13f576	13	38	0	0	28	34	9	30	20	6	39	0	0	0	0	16	0	32	9	9	0	0	0	0	0
4a65d8a13eca87112c1c214a24639030	0	33	0	25	50	35	10	9	12	0	13	0	15	0	0	6	0	7	9	0	0	8	10	28	0
ec42f5a125f042d847ecbc17d8274ef1	19	15	0	11	8	9	34	13	0	12	8	6	11	10	12	0	6	24	0	0	11	0	8	19	10
445dffb90ca770a460f368f6d0b85355	43	0	14	0	14	0	8	0	0	0	0	0	0	18	0	0	22	19	0	0	0	0	36	73	14
bec03f25d90b3e29fd277c3355032b45	0	0	13	13	21	0	0	0	0	17	0	0	19	37	10	9	80	11	0	0	0	0	8	18	20
ffff56793e69863e83313f0b2f6249aa	0	0	0	0	0	0	0	13	53	22	71	54	0	16	0	11	0	0	0	3	0	0	0	0	0
9ac37ab8f439885372259f633e69e362	0	0	0	0	0	0	0	0	0	0	0	0	0	0	0	0	0	157	0	0	0	136	0	0	0
34310f69cea12c7cadf9ef415c40fa14	0	26	0	0	0	18	0	0	0	0	0	0	0	0	0	0	0	0	0	0	0	0	183	52	0
7b6bf343d0a62d14f7c3cd606b5ea311	25	69	0	0	76	67	31	0	0	0	0	0	0	0	0	0	0	0	0	0	0	0	0	0	0
bec4867cd2b2d3f53721e81c040eb506	0	0	0	0	0	0	0	0	6	5	0	0	6	7	8	0	0	30	71	28	15	18	0	12	0
4995a5acebc88fd543d5822a83cda2ee	0	4	0	0	4	0	0	0	0	0	0	2	11	27	0	81	26	4	3	6	0	4	6	22	74
ec4f30dcba847a8a604069a3bd845a6f	0	0	0	0	0	0	0	0	0	0	0	0	0	0	0	0	0	0	78	0	0	76	0	0	0
e8622d6b14406de3007be50ad6a88c78	0	0	15	14	17	0	0	0	0	0	0	0	0	33	85	14	56	0	0	0	0	0	0	0	0
aa17566b246b12b660f3e25c498433bc	54	6	0	0	9	20	0	0	0	0	8	0	0	0	0	0	0	0	0	0	0	0	0	0	0
45181ae57750c9746d35df47ff775231	0	0	29	11	0	0	0	7	0	28	0	0	19	74	18	0	103	0	0	0	0	0	0	0	0
1a0075025069f215b28171574110c6fe	0	0	0	0	0	0	0	0	0	0	0	0	0	4	0	5	0	0	25	45	0	0	71	25	43
a88d313b5708e3cbc187d70361a7ad76	0	12	0	0	23	0	0	0	0	0	0	0	35	0	33	59	41	0	0	0	0	0	0	0	0
f098cbb48be722fffdcf1c5d5601d254	5	0	0	6	0	0	6	0	0	0	7	0	24	23	15	60	0	12	0	18	0	11	32	27	14
bb9603d4efb92bcf80d8463ebcad51fa	0	0	29	16	0	0	0	49	47	38	41	34	0	0	0	0	0	0	0	4	0	0	0	0	0
1f2cdaf4cdda9b8aea09e6b0a9f9d37e	0	0	0	0	45	16	0	21	57	18	21	66	0	0	0	0	0	0	0	0	0	0	0	0	0
1b0cd6861e2d4638a143e3c668b0715c	0	0	0	0	0	0	0	0	0	0	0	0	0	0	0	0	0	32	0	205	0	45	0	0	0
a2753476742e63345a2fe8c116338fc9	0	0	0	0	0	0	0	0	0	0	0	0	0	0	0	0	0	75	80	27	0	87	0	0	0
e72e26cc88a2ef0dee9c4b603d297369	0	17	0	0	0	0	0	0	18	18	0	0	24	19	0	50	32	0	0	0	0	0	32	46	25
09c625ac1ba0f3a6434e0fe44a257a02	0	39	11	0	11	19	0	0	0	0	16	0	0	22	0	37	0	0	18	0	0	0	42	0	0
0573753cc294d005c897e167729fb545	0	0	0	0	0	0	0	26	25	23	27	0	0	0	0	0	0	85	38	0	0	53	0	0	0
e3d3257e8da9b8c7c006cd10f2302878	0	0	0	0	0	0	0	0	0	0	0	0	0	275	0	0	0	0	0	0	0	0	0	0	0
00b8976bcb8d3189f7cc06a0c5b4968e	0	15	0	11	11	22	0	0	8	9	0	0	19	0	22	19	13	37	0	15	0	0	0	0	0
90bd833bee1b817312c775ec4eada1c4	0	23	36	18	52	35	14	0	0	0	0	0	0	24	0	33	0	0	0	0	0	0	7	24	6
513014dc6ab3274c754d1c9d0257b3b7	0	0	0	0	0	0	0	0	0	0	0	0	0	0	0	0	0	0	0	0	0	0	0	0	0
d3f43c63f8b151869e7a1d90e1679d4f	0	12	0	29	8	0	0	0	9	11	0	11	0	9	0	9	0	36	14	10	10	6	13	21	11
8a646de4d054e14ceb4c22631c328a60	0	9	0	0	16	28	0	0	32	0	12	26	14	25	0	0	0	16	0	0	0	0	0	22	0
614aa0c41be8ee8054cca3554772a2d2	0	0	0	0	0	0	0	0	0	0	0	0	0	0	0	0	0	43	46	87	0	0	0	0	0
27c8a1da9c47447535160e1177fb6e58	0	0	0	0	25	0	0	0	0	8	0	11	19	5	0	10	4	36	19	26	0	39	0	23	0
a1dfafd1280db21d70858bd08e2abe1c	0	0	0	15	0	0	0	0	44	44	0	26	31	0	0	0	20	0	0	24	0	25	0	26	0
f854bbf69f7a8a29c78ad451a62426fd	10	0	0	0	24	0	195	0	0	0	0	0	0	4	0	0	0	0	0	0	0	0	0	0	0
9433fee32e84f828303be6d16f617753	0	215	0	0	41	0	0	0	0	0	0	0	0	0	0	0	0	0	0	0	0	0	0	0	0
777160c7e0c4cab4dd12365a401b814e	0	11	0	3	9	9	13	0	7	0	12	0	9	0	4	0	0	0	0	0	0	0	13	33	64
5229fdc6b0918e1c30c008437d2a8503	0	0	0	0	0	0	0	67	0	0	198	0	0	0	0	0	0	0	0	0	0	0	0	0	0
b42c4d94266511d310ab9f2a156358dc	0	34	0	0	136	62	0	0	0	0	33	0	0	0	0	0	0	0	0	0	0	0	0	0	0
16ff160d588aaff8d81bce14d050ac0f	0	0	0	0	0	0	0	0	4	0	0	4	0	0	0	17	0	0	0	0	0	0	58	181	0
75705cad2a82832413efb70bf09f0a9e	0	0	0	0	0	0	0	0	0	0	0	0	13	0	0	16	7	44	56	57	0	20	0	25	0
9642ba5bc1e5cb018b420b9fb1f0c7d6	0	0	0	0	0	0	0	0	0	0	0	0	0	0	0	0	0	5	16	14	176	11	0	0	0
ca972331b64ef36b26f389f50a6e8838	0	0	8	21	0	0	0	0	7	0	6	5	0	16	16	15	0	16	5	6	0	16	0	23	7
4f2cd55b746370b02c9722d53dd5ab6f	0	0	0	0	0	0	26	0	0	0	20	0	0	0	0	40	38	0	0	0	0	0	27	67	0
11d25cf81b14610f1350bc38150fc23c	0	0	0	0	0	0	0	0	0	0	0	0	0	0	0	0	0	0	0	0	0	0	0	0	0
1abbaad6adfbf6cabd5b241cd209a853	0	0	0	0	0	0	0	0	0	0	0	0	0	0	0	0	0	0	0	0	26	54	52	0	60
796199a7f77714373f7549fe329bfcb6	0	0	0	0	0	0	0	0	0	0	0	0	0	0	0	0	0	75	33	31	0	65	0	0	0
aee9cd0226b67192db1d6dca1b543503	0	21	0	15	17	11	13	0	0	4	0	23	14	19	0	5	5	15	15	0	0	0	10	15	20
7002eb4fb621c4886c739d637eff6286	0	0	0	0	0	0	0	0	0	0	0	0	0	0	0	0	0	0	0	0	0	0	0	0	21
f86f74effe52d5f94caf9a8ed5a1a10e	0	0	0	0	23	13	0	0	0	0	0	0	0	0	0	0	0	50	33	80	0	51	0	0	0
21f0f6807baa9390d0673d8a9244d51e	67	0	0	0	80	24	0	0	0	0	0	0	0	0	0	0	0	0	0	0	0	0	0	0	0
0539a06355e397e4880e6dca48e8d0f0	0	0	24	35	0	0	0	0	0	0	0	0	0	0	12	30	0	17	0	0	0	11	0	84	11
c41a8375861d4b2ae4f6fbd57738ae6a	0	0	0	0	0	0	0	0	0	0	0	0	35	33	0	54	0	21	0	0	0	20	31	37	0
889ccae5218dd8aeec38d897ebb201d5	0	0	32	22	7	11	0	0	0	0	0	0	30	16	0	0	33	0	0	0	0	0	22	0	31
9daf6afe2b9f537063dd2fc4d95832ed	0	0	0	0	0	7	0	0	0	0	0	0	0	11	23	54	0	0	0	0	0	0	121	24	5
7810566493dc3627c53448a059fda086	7	6	0	0	14	23	25	15	45	6	21	30	0	0	0	0	0	0	0	0	0	0	0	13	0
90855ccbecbf78f461f8355c65628753	0	0	55	23	0	0	5	9	6	33	0	3	0	0	26	28	6	0	0	0	0	0	0	0	0
04ada6877bf758cc108adc8373860c1f	0	0	0	0	0	0	0	0	0	0	0	0	0	133	0	108	0	0	0	0	0	0	0	0	0
beab81c220d0cea8fa23848c781cf460	0	0	17	0	0	0	0	0	0	0	0	0	13	0	0	28	16	0	0	0	0	0	33	67	30
5b615bd3ee58a3bc9189344ed3275730	19	0	0	0	207	0	0	0	0	0	0	0	0	0	0	0	0	0	0	0	0	0	0	0	0
4ba879fe5446347f67b292c82f90ea28	12	0	0	0	13	15	0	0	0	0	0	0	7	34	0	29	21	0	17	82	0	0	0	0	0
ca614d20bd1635ffbb94ec8745358732	0	0	0	0	0	0	0	0	0	0	0	0	14	0	0	0	0	43	53	77	0	21	15	0	0
67641ef734abef6f0be362be6d7303dd	0	0	0	0	0	0	0	0	0	0	0	0	0	0	0	0	0	0	0	19	76	0	0	0	0
84480a4b335049e4833b8bfa379b52b3	0	0	0	0	0	0	0	0	0	0	0	0	0	0	0	0	0	114	12	0	0	110	0	0	0
f9cafdcad57935cc7ff1c4503d5bce37	86	0	0	0	0	43	0	0	20	16	0	16	0	0	0	0	0	0	0	10	0	14	0	0	0
51cee0e72df05d65a1de815e29c2b0c6	0	11	5	7	0	11	13	0	13	8	6	10	11	15	20	7	13	19	11	13	0	0	0	0	0
5f404b253badec38426a587557da6d30	0	0	0	0	0	0	0	0	0	0	0	0	0	0	0	0	0	41	40	0	0	56	0	0	0
56e9ae2e3434941a0913057859d56e1f	0	0	0	0	0	0	0	20	28	30	15	12	13	20	0	0	0	0	0	0	11	15	0	28	16
891d35abe4e6aa48cac8068acdfa1944	0	0	18	22	0	0	5	0	11	0	0	0	12	6	24	0	8	7	0	13	22	10	24	12	0
90c5ae25dfcf83db351c58e9ec322c2d	0	0	0	0	0	0	0	0	0	0	0	0	0	0	0	0	0	21	30	42	71	37	0	0	0
7d3b4a8846461c7a39acc8edbc061d12	0	0	0	23	0	0	17	11	0	0	10	9	9	21	23	9	0	0	0	23	0	0	19	24	7
8e10790644326676fd0478dfe76b7493	0	0	0	0	0	0	0	0	0	0	0	0	0	0	0	0	0	37	48	36	22	27	0	0	0
3c14a0d7103fbaf41ef55eb9f12ccc22	0	0	0	0	0	0	0	95	0	55	77	0	0	0	0	0	0	0	0	0	0	0	0	0	0
f560ec04691a0a24325b3dad7dc76a2f	0	0	0	0	0	0	0	0	0	0	0	0	56	0	0	0	115	15	27	0	0	13	0	0	0
fe63e23a024f872835ddb3b017133aef	41	0	0	0	74	80	0	0	0	0	0	0	0	0	0	0	0	0	0	0	0	0	0	0	0
b43d06d1b280a4ac668b3048fd39d864	0	0	0	0	0	0	0	0	0	36	0	0	0	0	0	0	0	44	15	77	0	28	0	0	0
0646635efc58476d5f617ce80bf1509b	0	0	0	0	7	0	0	0	0	0	7	0	0	0	0	0	0	51	54	63	0	34	0	6	0
231a2c2c3fadffb92707e64f8693119d	0	0	0	0	0	0	0	43	17	79	15	13	0	38	0	0	17	0	0	0	0	0	0	0	0
876e1f6d125c1e6334a407ca531ad37d	0	0	0	0	0	0	0	27	0	37	0	0	0	0	0	0	0	0	0	0	0	0	23	0	0
6fc8b7264917dd9376fdf06eb6e0cd35	41	0	0	0	55	59	18	0	0	0	0	0	0	0	0	0	0	0	0	0	0	0	0	0	0
85a5e69f60b9265d0e247b17af467369	0	0	62	55	0	0	0	0	0	0	0	0	0	0	0	0	0	15	11	6	0	15	9	0	20
2a78f99484feecc1363f74cfc2856d7a	0	0	0	0	0	0	0	0	0	0	0	0	0	0	0	2	0	83	0	0	0	101	0	0	0
de4f850d1836f6753c638631a507db5f	0	0	0	0	0	0	0	0	0	0	0	0	0	0	0	0	0	107	0	0	0	110	0	0	0
0c26fd30c6d3a3a129f3ce7995803b73	0	0	0	0	0	0	0	0	0	0	0	0	0	14	0	0	19	62	0	0	0	66	56	0	0
636b142af8dcba212872ba9b8811e8f0	0	0	52	47	0	0	0	0	0	0	0	0	0	0	0	0	0	0	0	0	0	0	28	13	0
ccbc9d0bada2cd65863df0df36af4893	0	27	0	0	15	0	11	0	0	0	0	0	0	0	0	0	0	18	19	12	54	26	0	0	0
41e8e71b5733c1d7558d353a6f33c431	0	0	7	19	20	21	0	0	7	7	14	0	0	0	0	0	0	0	20	7	0	0	0	14	16
dc103e9961de0458ad65ea102f5af183	0	0	0	0	0	0	0	0	0	0	0	0	0	0	0	101	0	0	0	0	0	0	115	0	0
09ac0caab3aafad7dc34e0b724acd62c	0	0	46	28	0	0	0	0	0	0	0	0	52	0	0	0	18	0	0	26	0	0	0	0	44
991754b7b5fab0e066957a7fbc3fbf63	0	0	0	0	0	0	0	0	0	0	0	0	0	0	0	0	0	66	0	59	0	0	0	0	0
29635491d729525b52a11f81671920a3	0	0	0	0	0	0	0	30	36	41	21	30	0	0	0	0	0	15	0	0	0	14	0	0	0
fbe078a9629ffa7bcdddb83962e7f75a	0	0	13	21	0	0	0	18	7	20	0	0	50	6	18	28	0	0	0	0	0	0	0	0	0
261a0815d6282c4007aef6f0763cf089	0	0	0	0	0	0	0	60	0	37	113	0	0	0	0	0	0	0	0	0	0	0	0	0	0
1e3cc5e87adcf6b45ceaf84f65d3254a	0	0	0	0	0	0	0	68	0	15	127	0	0	0	0	0	0	0	0	0	0	0	0	0	0
10382a5cb34a17de72cf8e6c97e1c9d6	0	0	0	14	0	0	0	0	0	0	0	0	22	56	61	0	31	0	0	0	0	0	0	25	0
efcafd39c390107702edb6c64d469b7d	0	0	11	0	0	0	0	60	12	5	92	16	0	0	0	0	0	0	0	0	0	0	0	0	0
c8d2c34032244f375a5461eee721a54c	0	0	0	0	0	0	0	74	0	20	114	0	0	0	0	0	0	0	0	0	0	0	0	0	0
3254924ed32689dd63e544bea61b0fd2	0	0	0	9	3	0	4	0	23	0	0	9	12	7	5	0	0	12	7	8	0	37	0	0	8
94fc7bb978e37995f9e3e5345d3b5db7	0	156	0	0	0	0	51	0	0	0	0	0	0	0	0	0	0	0	0	0	0	0	0	0	0
62a374f672e2a0fb443be8ee0d068958	0	13	0	0	0	0	0	0	0	0	0	0	0	0	0	0	0	63	22	57	0	51	0	0	0
47fd5241a73881bc0c47b3711fba2279	0	0	0	0	0	0	0	0	0	0	0	6	20	65	0	23	0	22	19	24	0	11	0	0	14
71973b158ce2f2a9bf5e4dd8f01790c2	0	0	0	0	0	0	0	0	0	0	0	0	0	0	0	0	0	72	0	74	0	57	0	0	0
2c712185aa1393c5337effc878d40775	0	0	0	0	0	0	0	0	0	0	0	0	0	0	0	0	0	56	86	17	0	44	0	0	0
bf942fd4caeec9d79e80667604b12b98	0	0	24	9	0	0	0	0	0	0	17	0	11	11	23	23	4	10	0	0	0	7	6	22	17
c5c255ea3f0ea4f142ef629ebee5232f	0	2	0	0	0	0	0	14	57	31	5	85	0	0	0	3	0	0	0	0	0	0	0	0	0
bb9fa73031e0078614369009b6b4658d	0	0	0	0	0	0	0	52	34	50	65	0	0	0	0	0	0	0	0	0	0	0	0	0	0
8060239a5a08b8bde368761fedb27353	56	0	0	0	55	30	15	6	0	6	0	0	0	0	0	0	0	0	0	0	0	0	0	0	0
7e02ad925e834ed13d434371f7e99b6f	0	0	0	0	0	0	0	0	0	0	0	0	0	0	0	0	0	49	0	51	0	44	0	0	0
f992e5932068ac0e312a6c252d671f1f	42	0	0	0	21	47	29	0	0	0	0	0	0	0	0	0	0	0	0	0	0	0	0	0	0
035f4480d5ef992a52343ddf3e276120	0	0	0	0	0	0	0	0	0	0	0	0	18	0	0	36	18	0	0	0	40	0	0	42	44
0f73dd128063976792c1bb07b9190506	70	19	0	0	23	24	24	0	0	0	0	0	0	0	0	0	0	0	0	0	0	0	0	0	0
ed65fb5f2b98bbca1243d1540ce61081	0	0	0	0	0	0	0	0	0	0	0	0	0	0	0	0	0	0	0	0	0	55	95	0	0
caf19c4ab84f7cadd01d00ee3ab3b995	0	0	0	0	0	0	0	0	0	0	0	0	0	0	0	0	0	26	150	19	0	0	0	0	0
dab1fcba6c45c268fdd093ff0cfdb1c6	0	0	0	0	0	0	0	0	0	0	0	0	0	0	0	0	0	0	0	0	0	0	0	0	0
b1636e9d60b5c188c6eda2303bbc4192	0	0	0	0	0	0	0	0	0	0	0	0	0	0	0	0	0	38	33	53	8	30	0	0	0
30e7cf45024e37da814d19e8c509a1fc	0	0	22	17	0	0	0	0	12	16	0	0	0	0	0	0	0	38	14	36	0	16	0	0	23
ae0f8e607b685875c76ad45b6f2269b5	0	0	0	12	0	0	0	0	0	8	30	0	18	21	0	27	15	0	0	0	0	0	0	36	27
7c9da14ba98f3a3ac3b5b3035ee91748	0	0	0	0	0	0	0	20	11	14	118	8	0	0	0	0	0	0	0	0	0	0	0	0	0
a7579339873d04d5066287dbf0494e6d	0	37	0	0	31	8	4	0	0	0	50	0	0	0	0	0	0	28	0	0	0	26	0	0	0
87a90d0afa7cf92a2ec8393c8859382c	0	0	16	20	0	0	0	0	0	0	0	0	27	31	55	25	0	0	0	0	0	0	0	0	9
957d4dcb2547a085c054f2f838f434ae	7	3	11	9	0	4	0	0	0	0	0	0	0	17	0	21	18	5	6	0	0	13	22	2	20
a7fe94b279f7c3ba8c4b71ce1503dac1	48	8	0	0	10	23	24	0	0	0	0	0	0	0	0	0	0	0	0	0	0	0	0	0	0
7a427386db3c1faef0438622a4a72eb4	0	30	0	0	29	110	0	0	0	0	0	0	0	0	0	0	0	0	0	0	0	0	0	0	0
31ce870a7050b39e0f50f624bab0ff43	0	0	49	54	0	14	0	0	13	0	0	0	0	24	0	0	0	0	0	0	0	15	0	7	0
1efde410edd39beee529f6383ee220a6	0	0	84	26	0	0	0	0	0	0	21	0	0	0	0	0	0	0	0	0	0	0	0	0	0
fbf519fa6c351809ed9426ac9188712d	0	13	0	0	20	12	37	14	10	14	17	15	0	6	0	0	0	0	0	0	0	0	0	0	0
9c5fa634f3f9d3e265d7bdda256d3bde	0	0	0	0	0	0	0	0	0	105	0	0	0	85	0	0	0	0	0	0	0	0	0	0	0
8e1d82472fe42bfd248d09bec5a29904	0	0	0	0	11	27	0	0	0	0	0	0	56	0	0	0	0	0	9	0	0	23	0	0	0
48de1df653de65061ef9e031856cd19c	0	0	0	0	0	0	0	0	0	0	0	0	0	0	0	0	0	0	0	0	0	0	189	0	0
29ebadd4248596250d19650aae3248bd	0	0	0	0	0	0	0	0	0	0	0	0	0	33	0	0	0	0	0	0	9	0	0	34	17
3eb5eb901e579727118dbefc846c2365	0	0	0	0	0	0	0	48	27	56	30	14	0	0	0	0	0	0	0	0	0	0	0	0	0
41bb7679b96409c448deff390fc1146a	0	0	0	0	0	0	0	0	0	0	0	0	0	0	0	91	0	0	0	0	0	0	95	0	0
4232f1bd9c0eeda87e87009eccd4f493	0	0	0	0	0	0	0	0	0	0	0	0	43	13	52	0	77	0	0	0	0	0	0	0	0
d6731777888b864236005a71e590a74b	0	0	0	0	0	0	0	0	13	0	19	18	8	0	0	39	0	0	20	0	0	11	0	0	0
2f54b2f8855d6bd8575a896972c9366a	0	0	7	2	77	5	51	0	0	5	0	0	0	0	0	0	0	0	0	0	0	0	0	7	20
700859d9cf7df41d64c35d4e627b2076	0	11	0	0	8	0	0	0	0	0	0	0	26	0	0	0	0	26	21	30	0	21	0	0	0
e0c931559ffd3ff4b7721301888aa05d	0	0	0	17	13	0	0	6	7	12	0	6	11	15	29	24	13	0	0	9	0	14	0	0	0
507add7133ffd77dbfb25ec901eddca3	0	183	0	0	0	0	0	0	0	0	0	0	0	0	0	0	0	0	0	0	0	0	0	0	0
9794614b8d1a145a1883973c80981bb8	6	0	3	4	5	0	0	0	0	3	10	0	10	11	7	18	0	7	14	14	0	8	9	14	11
1e71ac7983719c467be0e0a3d6979e8b	0	0	0	0	0	0	0	0	0	0	0	0	0	0	0	0	0	29	19	68	0	13	0	0	0
aa547989f7aeeedb35f5b4adf00c599a	28	0	0	0	5	19	0	4	4	14	0	0	0	0	0	0	0	30	15	0	0	15	0	0	0
f159227d83c490f744685a5aa070f003	0	0	0	0	0	0	0	0	0	0	0	0	0	0	72	35	35	26	0	0	0	0	0	0	12
c08ca944f4478e382c9a9da98bf8e78c	0	0	0	0	11	5	0	0	18	0	14	12	0	0	0	0	0	4	0	0	0	0	0	21	24
4e61b05711aa4df6f00648a24b3eb4f0	50	0	0	0	0	0	0	17	25	18	14	23	0	0	0	0	0	0	0	0	0	0	0	0	0
36b0d6df5bc142b919d56d6abfc35c99	0	0	0	0	0	7	0	0	0	0	0	0	167	0	0	0	0	0	0	0	0	0	0	0	0
cc6e48eadf621ca218a8118b5be9e45e	0	0	0	0	0	0	0	0	0	0	0	0	0	0	0	0	0	24	0	64	65	0	0	0	0
08cf276420421473391f15e8c43fd4f1	12	6	0	0	0	0	0	0	30	0	0	38	6	0	0	0	0	25	8	8	0	19	0	0	0
a53d85463ac951c4dd976bc33d125a07	0	0	0	0	0	0	0	29	0	0	147	0	0	0	0	0	0	0	0	0	0	0	0	0	0
4e65a374b8f123251d16630e035fb4d2	0	117	0	0	0	59	0	0	0	0	0	0	0	0	0	0	0	0	0	0	0	0	0	0	0
a3e5ed4f236ccc0603c2f0bb49cf6883	0	0	0	0	0	0	0	0	0	0	0	0	0	0	0	0	0	0	0	0	30	44	39	24	16
765a82176c707adfec27e65403ded460	0	0	0	0	0	0	0	0	0	0	0	0	0	0	0	0	0	26	23	20	18	34	0	0	0
e30a0f04df54a49903da30a52df1dd69	0	6	0	3	0	0	0	7	0	0	12	3	0	0	7	6	0	26	23	13	0	22	0	12	5
b99c048523de4f9acf729edd9baaf77e	0	7	0	10	0	0	0	0	11	0	17	7	7	12	0	3	0	3	0	0	0	0	40	21	14
cff019cf26502ba681a8d2b2e6f04363	0	0	0	0	0	0	0	0	0	0	0	0	6	0	5	7	0	45	50	17	0	41	0	0	0
ceaf73ed820b5910980360b3035bc290	0	0	0	0	0	0	0	0	0	0	0	0	0	0	0	0	0	19	24	24	21	46	0	0	0
257245277c6be4fc18dbf387f3bb20b9	0	0	0	0	0	0	0	0	0	0	4	0	0	6	7	4	0	31	16	44	0	7	8	11	9
7ad5bcb641e22d1ab6d16280fd856998	0	0	0	0	173	0	0	0	0	0	0	0	0	0	0	0	0	0	0	0	0	0	0	0	0
7a479581fbd914407ce742e28ca0546f	0	33	0	0	0	9	0	0	5	43	0	0	11	0	7	20	0	0	0	0	8	0	29	0	0
e03a2cdd0bb51190a95d1133f3a8338c	0	0	0	0	0	0	51	0	0	0	0	0	0	55	0	0	0	0	0	66	0	0	0	0	0
e21a6173d0e42ad1ca288182e53db5a4	0	0	14	9	0	0	0	0	0	0	0	0	0	0	0	0	0	28	9	6	0	18	28	32	9
1b556058d3b095d903b3e7f9cafd43bb	0	0	0	0	0	0	0	34	0	0	0	0	0	0	49	0	0	34	0	0	0	0	0	0	0
2884a0aea3f2c71f6027f26745b280bc	8	92	0	0	55	0	17	0	0	0	0	0	0	0	0	0	0	0	0	0	0	0	0	0	0
7ad901cc77e6a18d79fb444576e74bf7	0	0	0	0	0	0	0	0	19	0	83	16	0	0	0	0	0	6	0	9	0	0	0	0	0
368e2b2eaf2764585246dd47d131a4aa	0	0	0	0	7	0	0	0	0	0	0	0	71	16	35	13	20	0	0	0	0	0	0	0	0
b5adf5fe29fd6cfa8b7b4f17beeb0c74	29	35	0	0	48	16	5	0	0	0	0	0	0	0	0	0	0	0	0	0	0	0	0	0	0
8a47e3120b9e8c187b82d008585162f4	0	0	0	0	0	0	0	0	11	0	0	24	0	5	0	0	0	16	38	0	0	12	9	0	0
58e77ee66259ae9f94fe174e650e1a9d	0	0	0	0	0	0	0	0	0	0	0	0	0	0	0	0	0	87	22	0	0	61	0	0	0
cd99c28649250b27ac159846f513aaa9	0	0	0	0	18	15	0	0	0	0	0	21	9	0	0	0	0	16	12	14	0	0	10	0	12
286d4969874789c9526604e47de8c0f5	65	0	0	0	0	0	0	0	0	0	0	0	11	0	0	0	0	0	0	0	0	0	0	0	0
ae4070714d438e35b25d625788a22c6d	0	0	0	0	0	0	0	28	38	43	26	33	0	0	0	0	0	0	0	0	0	0	0	0	0
da539626cd0a5a5d76493dfd01120eb8	0	0	21	24	0	0	0	0	0	0	0	0	0	0	41	0	0	0	28	26	0	0	0	0	0
ccadfb1cbfccf00cf5f9d03d6183bf18	0	0	0	0	0	0	0	0	0	0	0	0	0	0	0	0	0	92	0	0	0	75	0	0	0
77ce9968d66d4fdd9b10c0403e85f327	0	0	0	0	0	0	0	0	0	0	0	0	0	0	0	0	0	57	56	0	0	54	0	0	0
4421615890415c3d0831344e21345873	0	0	19	46	0	0	0	0	0	0	0	0	0	0	0	0	0	0	0	0	0	0	0	102	0
63b0adbbebf5c37405d5e9df31cc9aaa	0	0	0	0	0	0	0	0	72	33	0	62	0	0	0	0	0	0	0	0	0	0	0	0	0
61f579ad5c75b218b868449a725c979a	0	0	0	0	0	0	0	0	0	0	0	0	103	0	64	0	0	0	0	0	0	0	0	0	0
3b37daabd06f75062741755f5f67fd9b	0	0	0	0	165	2	0	0	0	0	0	0	0	0	0	0	0	0	0	0	0	0	0	0	0
f54da71ac36e400d0bb0a8c77bfbd5a8	0	0	0	0	0	0	0	0	0	0	0	0	0	0	0	0	0	32	0	102	0	18	0	0	0
e06fb82230285ff88fafd691bd276990	0	0	0	0	0	0	0	0	0	0	0	0	0	0	0	0	0	31	56	36	0	22	0	0	0
7f975fdd17f1f2e3e6edda4b7a257d1f	0	108	0	0	0	58	0	0	0	0	0	0	0	0	0	0	0	0	0	0	0	0	0	0	0
13a9630ea29536b4792646216d11398d	0	0	0	0	0	0	0	0	11	0	0	12	0	0	0	0	0	4	10	115	7	0	0	0	0
eae5239b80920ed98d661b2fe33ed8e2	0	0	0	0	0	0	0	0	0	0	0	0	11	0	0	0	0	0	0	0	0	0	0	44	50
032ca701eaf8ca837101669f56349e59	0	0	0	0	128	0	0	0	23	14	0	0	0	0	0	0	0	0	0	0	0	0	0	0	0
55008c2d9209381c58c997574eb03d7a	0	0	57	35	0	0	0	0	0	0	0	2	0	0	51	0	19	0	0	0	0	0	0	0	0
0dbb4ab90513c864b28eea1c766b731e	0	0	0	0	0	0	0	0	0	0	0	0	0	0	0	57	0	0	0	0	0	0	107	0	0
cbcb2c3da35cd04771bd198c552497b0	0	0	0	0	0	0	0	0	18	6	0	25	4	0	4	7	3	20	3	18	0	23	8	0	0
d12840321784079ce56b26608e740dc7	0	24	0	0	0	0	0	0	0	10	0	0	45	0	23	47	0	0	0	0	0	0	0	0	0
ccc721434383f40549ec54bfe9567f64	0	0	7	0	0	0	0	0	0	0	0	0	0	0	0	0	0	4	0	2	0	0	15	12	85
7441c1411dc6070b4dbfb89680c5e070	0	0	0	0	0	0	0	0	0	0	0	0	0	0	21	111	0	10	0	9	0	8	0	0	0
b603865a7c3d9221efe2766cf6ca5a18	0	0	16	18	0	0	0	0	0	0	0	0	30	15	5	7	0	0	0	0	0	9	17	42	0
034b47ed11a1a3f7a51e12c21c02721f	0	7	13	7	14	5	0	0	9	0	0	0	0	32	34	4	0	2	0	0	0	0	0	26	0
d2fde1961a72f4955bd0b19ba1375438	0	0	0	0	0	0	0	0	0	0	0	0	0	0	0	0	0	0	0	0	0	0	0	0	0
3715b875f050bab5798f92cacabd4829	0	0	0	0	0	0	0	0	0	0	0	0	0	0	0	129	0	0	0	0	0	0	0	0	0
618ea659c1d355b2a20e3a79fd9785fa	0	0	0	0	0	0	0	0	0	0	0	0	0	0	0	0	0	0	0	0	0	0	0	0	0
eead5c9da2f64cb5d3dc53f3d955a521	0	0	0	0	2	0	0	0	0	0	0	4	0	13	3	0	0	33	17	34	0	27	0	0	0
146ef250bba184f0bd0bb6cc055e0299	0	0	0	0	0	0	0	23	10	40	17	12	0	0	0	0	0	0	0	0	0	0	0	0	0
e8499ce377c7ea30fb748c6eb737fe9a	0	0	0	0	0	0	0	0	0	0	0	0	0	0	0	0	0	44	112	0	0	0	0	0	0
79df23ce6a837989a82c372a11bec32d	0	0	0	0	0	0	0	0	0	0	0	0	0	0	0	0	0	0	0	0	0	0	0	0	0
79f810c4d34d09bc26c00389d16f0b48	0	0	0	0	0	0	0	0	0	0	0	0	0	0	0	0	0	0	70	85	0	0	0	0	0
c4760aa2aed9871f59bd9ba0de8c4acd	0	0	0	0	0	0	0	0	20	46	0	0	0	0	0	28	0	0	0	0	0	0	39	0	0
a9308ccef898076e858586af17dfd27e	0	0	0	0	12	0	0	0	17	0	0	18	11	0	0	0	11	0	0	21	0	0	0	0	0
355fb27c16a34c7536beb10e3e1f3b3d	0	0	0	0	0	0	0	0	0	0	0	0	0	0	0	0	0	80	26	0	0	48	0	0	0
2edea37ec213b917b66e717b54f176c9	0	0	0	0	0	0	0	0	0	0	0	0	0	0	0	0	0	0	0	153	0	0	0	0	0
093c8b480725489722e16bef251d5357	0	0	15	21	0	0	0	0	0	0	0	0	25	0	0	0	0	0	0	0	0	0	18	28	27
48edca5377791dca365e760bd4c75e75	0	0	0	0	0	0	0	0	0	0	0	0	61	49	0	43	0	0	0	0	0	0	0	0	0
16a11c0cd04ac1bbb1d21d68e78822dc	0	0	0	0	0	0	0	0	0	0	0	0	0	0	0	0	0	28	73	0	0	50	0	0	0
28812fcb60b6644a3d3fc9f41f60698e	0	0	0	0	0	0	0	0	0	0	0	0	0	0	0	0	0	0	0	0	0	0	0	0	0
7fcd6eac3925dbc48d1fe6014442557f	0	0	0	0	0	0	0	0	0	0	0	0	0	0	0	0	0	29	27	29	0	0	0	0	0
c7d6382baaa6f8ba2d1366cab787ff68	0	0	0	0	0	11	0	0	0	0	0	0	23	0	0	0	0	0	0	0	17	19	21	30	20
2863a555ff8d8ab29d5c39f539f2a858	0	0	8	9	6	0	0	0	5	0	10	0	0	9	9	9	4	3	0	3	0	0	26	24	0
3a8889ea85cf16fc7778d338fd9a5fe4	0	0	27	0	0	0	0	0	0	0	0	0	7	32	0	7	12	16	35	13	0	0	0	0	0
830fe6e16c1fdf90b1377b04c7ba9f11	0	0	0	0	0	0	0	0	0	0	0	0	0	0	0	0	0	46	20	16	0	34	0	0	0
908a923b0ea500cdaaa14a37a10e1467	0	0	0	0	0	0	0	14	11	11	9	0	10	20	10	21	10	11	0	0	0	0	0	0	0
45c878bf5f98ff336597ed6b9e27dbc9	0	0	0	0	70	74	0	0	0	0	0	0	0	0	0	0	0	0	0	0	0	3	0	0	0
71b4f4f5cf839ffa44088ff9ad14cb29	0	0	0	0	0	20	0	0	0	0	0	0	0	0	0	25	31	6	0	0	0	0	39	0	4
d1db60a3c90f2bca8c2291650cd7bf59	0	9	0	0	33	30	0	0	0	0	0	0	0	64	0	0	0	0	0	0	0	0	0	8	0
7c54f7733c39d894910fec579a62088a	44	30	0	0	0	0	0	0	0	0	0	0	0	0	0	0	0	0	0	0	0	0	0	0	0
e5ae4b9336b6a1ee0bffac54353dd71e	0	0	0	0	73	7	0	0	0	0	0	0	0	0	0	0	0	44	22	0	0	0	0	0	0
3c80787b2713757440911ae928b76b0e	14	47	0	0	22	4	31	0	0	0	0	0	0	0	0	0	0	0	0	0	0	0	0	0	0
74303421076d022f1923d1538aa841c7	0	0	0	87	0	0	0	0	0	0	0	0	0	0	0	0	0	0	0	0	0	0	0	58	0
11ba2dfea8780d5de7a226686383467d	0	0	0	0	0	0	0	26	38	45	5	31	0	0	0	0	0	0	0	0	0	0	0	0	0
9dd2c8edf4c1e885f8250576b6f7e7d0	11	27	0	0	8	23	8	11	5	2	31	0	0	0	0	0	0	0	0	0	0	0	0	0	0
787aa0c4360214fe6509c13cdc6cb695	0	0	0	0	0	0	0	0	0	0	0	0	0	0	0	0	0	49	40	0	0	55	0	0	0
57a8b11678a318aa5a9543c3fe857eee	0	0	5	0	9	5	0	0	0	0	3	0	6	15	11	9	3	6	0	14	0	7	0	28	5
1d86393c6240deb32ab4a3d9f9284ef6	0	0	0	0	0	0	0	0	0	0	0	0	0	0	0	0	0	0	143	0	0	0	0	0	0
37a21185b8b097be863a480f6a91c496	0	0	16	0	0	0	0	0	0	0	0	0	26	25	33	22	21	0	0	0	0	0	0	0	0
6d146fd904363eb78481c304018c69d2	0	0	0	0	0	3	0	0	0	11	11	0	0	0	0	0	0	12	0	0	0	6	24	15	20
bc13eba636b3d7edf316151e5d95f2b0	0	7	0	0	24	0	8	0	0	0	0	0	0	0	20	0	0	18	10	0	0	0	11	12	0
177fa89d68cea76c4cca80a36e6d9254	0	0	0	3	0	0	0	0	0	0	0	0	2	8	6	8	0	0	0	5	0	0	20	42	23
ea74f77e4100bfb6cd781caec7405bc0	0	9	40	49	0	0	0	0	0	0	0	0	0	0	0	0	0	0	0	0	0	0	0	0	22
375951e885ad03918b7313cdd87b22b8	0	0	0	8	0	0	0	0	0	0	0	0	0	0	93	0	5	0	10	24	0	0	0	0	0
58225734163209910fc7df83bd14263e	0	0	0	0	0	0	0	0	0	0	0	0	0	0	0	0	0	0	0	0	0	39	34	23	22
2bce3fb6f9a5169c970998ef1a923eed	0	0	0	12	0	0	0	0	37	0	0	0	0	0	0	0	0	0	0	0	0	32	0	0	0
b793af0220bca9e3bae3a0108d918028	0	0	0	0	0	0	0	0	0	0	0	0	0	0	119	0	0	0	21	0	0	0	0	0	0
7df0de1fc0962db165f1a87b79ed0af6	0	0	0	0	0	0	0	0	0	0	0	0	0	0	0	0	0	18	10	50	19	12	0	7	0
a09103ca73ff8e57c7a27c763c90b78d	0	0	0	0	20	20	0	0	0	0	0	0	0	0	0	11	13	0	0	0	0	0	30	24	0
227f75f8c8a295b4c3bc60345ad09723	0	0	0	0	0	0	0	0	2	0	0	0	0	0	0	0	0	60	27	0	0	33	0	0	0
ddb48ce03e659deaf8eae0e96b06cf5c	0	9	0	0	0	0	0	0	17	16	0	0	7	0	0	14	0	0	0	0	0	22	13	12	0
043929bc335f80aa2d3194f47393e6ff	0	0	0	0	0	0	0	0	0	0	0	0	0	0	0	0	0	20	29	27	0	37	0	0	0
4a75ff0bae5bda54eea0477cd9facd33	6	0	0	0	9	9	4	0	0	0	3	7	7	12	0	4	5	10	8	5	0	6	0	10	14
8e7a5f306d47610e0ab88e4f44f9d83f	0	0	0	0	0	0	0	18	0	0	45	0	2	0	0	0	0	5	0	0	0	5	3	14	29
17c5447bd50c08e71f2c95a6a88922bb	0	17	0	11	9	5	0	0	0	11	7	0	0	0	0	8	0	6	12	0	0	8	18	0	8
db5c5eb8cfad240ac9da262ca930b4a5	0	0	7	0	0	0	0	0	0	0	0	0	19	0	0	0	0	0	0	0	0	0	83	0	0
68a2cc5dbc68c4406ab7c8a9a5c3b7d2	0	0	0	0	0	32	0	0	33	0	10	41	0	0	0	0	0	0	0	0	0	0	0	0	0
864cd9737541cb7eb2ec7e6e7249c979	0	0	0	0	0	0	0	37	0	74	18	7	0	0	0	0	0	0	0	0	0	0	0	0	0
6ceea50d16d22f7b4584fd77484b24ee	0	0	0	0	0	0	0	24	0	0	104	0	0	0	0	0	0	0	0	0	0	0	0	0	0
fffb46e1291463618fba9729d3ce936d	0	0	0	0	30	94	0	0	0	0	0	0	0	0	0	0	0	0	0	0	0	0	0	0	0
22632c954ef155ebb0c3d54d46fac742	0	0	0	0	0	0	0	0	0	0	0	0	0	0	0	0	0	0	0	0	27	24	27	18	22
bf1ac9d5605ead69898296bef2994d54	0	0	11	0	0	0	0	0	0	0	0	0	0	0	8	0	3	9	5	0	0	3	16	34	23
fe995de29d50b1961a662994206c3885	0	0	38	41	0	0	0	0	0	0	0	0	0	0	0	0	0	0	0	0	0	0	0	55	0
dc3a4c2c68f4a2c2a97a9d54fc98cc1c	14	50	0	0	18	0	9	0	6	8	6	0	0	0	0	0	0	0	0	0	0	0	0	0	0
67d6ad7660ea4976a1b2991d821091e4	0	20	0	0	87	27	0	0	0	0	0	0	0	0	0	0	0	0	0	0	0	0	0	0	0
3a5bc18a9562ae184c227e0d1950a006	0	0	0	0	0	0	0	0	0	0	0	0	0	0	0	0	0	25	51	15	0	28	0	0	0
09031be10b5c9aa45c181b6ff2ba3baa	0	0	0	0	0	0	0	0	0	0	0	0	0	0	0	0	0	0	0	0	14	21	27	19	21
42f80bd6b3055de0158ebf6390edd1b4	0	0	0	0	0	0	0	0	0	34	0	0	0	0	0	22	0	12	0	0	0	31	0	0	0
74c764cd57dcb0e8dc8945a1836bdc3a	0	0	0	0	0	0	0	0	0	0	0	0	0	0	0	0	0	0	0	0	0	0	0	0	0
94518b7655c5bfae9dc4d1f376080680	0	0	0	0	0	0	0	0	0	0	0	0	0	0	0	0	0	41	42	0	0	48	0	0	0
d45305fe7faacee43046c70da4802ebc	0	0	26	0	0	0	0	0	0	0	0	0	0	0	0	0	0	0	0	0	0	0	0	0	0
e3c17531cfc2e39cbf2933819f216853	0	0	0	0	0	0	0	0	0	0	0	0	0	0	0	0	0	22	12	16	0	60	0	0	0
324524ce5f17a75870dd74cdd674d58f	0	0	32	36	0	0	0	0	0	0	0	0	0	0	0	0	0	0	0	0	0	0	0	16	12
aa8d20f08616b380e3d4bb820afc8d30	0	0	0	0	0	0	0	0	0	0	0	0	0	0	0	0	0	0	0	0	0	0	0	0	0
157fd69ca67d1483eadfa5e959e444f4	0	0	0	28	0	0	0	0	3	40	0	0	0	0	0	0	0	0	0	0	0	0	57	0	0
742756da70d2208ce5bf0c09dd7f4b8b	0	0	76	39	12	0	0	0	0	0	0	0	0	0	0	0	0	0	0	0	0	0	0	0	0
e38100ec84710d5714210cde3089940b	0	0	0	0	0	0	0	29	28	35	0	24	0	0	0	0	0	0	0	0	0	0	0	0	0
79fedd992501b941ef1dbfb80b82b3b7	24	0	0	0	0	45	0	0	0	0	0	0	0	0	0	0	0	0	0	0	0	0	0	0	0
9dcf2f68e4f6fd21ef1be34786b523f2	0	0	0	0	45	19	52	0	0	0	0	0	0	0	0	0	0	0	0	0	0	0	0	0	0
39473adf8962efbc5e301b55e6eb3720	0	11	0	0	0	0	0	0	0	0	0	0	0	0	0	0	0	0	0	0	0	0	0	0	0
f82026926e4f0c2c43d7ca8aa4082e58	0	5	7	9	5	0	10	0	3	0	0	0	6	0	29	5	14	0	0	11	0	3	0	0	0
5f21a59a7bd32f3401e874e4e2392251	0	11	0	0	14	0	0	0	5	5	0	0	0	0	0	17	15	15	9	14	0	0	0	0	0
03c305cdcbd4af7902dfd3195d771d74	0	0	0	0	0	0	0	0	0	0	0	0	0	0	0	0	0	0	123	0	0	0	0	0	0
3d1b901376817b12de725e584e7fd6b8	0	0	0	0	0	0	0	0	0	0	0	0	25	0	0	0	13	45	29	0	0	0	11	0	0
656ca26795aa5b8146020c8503feaec0	0	0	0	0	0	0	0	0	0	0	0	0	0	0	0	0	0	0	0	0	0	0	71	0	11
a313beb501e5a1dfd95be4255d50fc5b	0	0	0	0	0	0	0	0	0	0	0	0	0	0	0	0	0	0	0	0	0	0	0	67	56
ed29cc7757f75de451de6fcb47cfd425	0	0	0	0	0	0	0	0	0	0	0	0	49	48	11	0	0	0	0	0	0	0	0	0	7
a7b103f56402bb482fe9e00222dc0427	0	0	0	0	0	0	0	0	0	0	0	0	0	0	0	0	0	49	0	0	0	61	11	0	0
d21cf466c54c2adc5e1fdc805e5dc70a	0	0	0	0	0	0	0	13	22	22	22	28	0	0	0	0	0	0	0	0	0	0	0	0	0
e43c26563e4ea0bfaf4c3cb864d978ce	0	0	0	0	30	0	0	0	0	68	0	0	0	0	0	0	0	0	0	0	0	0	0	0	0
32304a9c157118861d089f34599a12d8	0	0	0	0	23	0	41	0	0	0	0	0	0	0	0	0	0	0	0	0	0	0	0	0	0
509fc876657f3c3ef404cbdddac48a2b	0	0	0	15	0	0	0	0	0	0	0	0	0	0	0	0	0	0	19	10	0	17	0	0	0
c1875861b5a468ea5b2fb14df217b059	0	0	54	36	0	0	0	0	0	0	0	0	0	0	0	0	0	0	0	0	0	0	19	0	11
9bba68a455b2ec3a64e8dbaeb6922110	0	0	0	0	0	0	0	33	25	36	0	26	0	0	0	0	0	0	0	0	0	0	0	0	0
f401ca4a08c97873795400cba56891ca	0	0	0	0	0	0	0	0	0	120	0	0	0	0	0	0	0	0	0	0	0	0	0	0	0
c763edada8b76d1af221b9c34eb26568	0	0	0	0	0	0	0	0	0	0	0	0	0	0	0	0	0	52	15	12	0	40	0	0	0
6526f94008b4661c8156ae27a5cd1792	0	0	0	0	28	0	0	0	0	0	0	17	0	0	0	0	0	0	0	0	0	0	0	0	0
9dfd3c312db3e2a3fa13ed7043f57f72	0	0	0	0	0	0	0	0	25	11	0	46	0	0	0	0	0	0	0	0	0	0	0	0	0
e3e4d5ed6459ed60f6e804e8e3ecbc2b	0	0	0	0	0	0	0	31	15	14	45	14	0	0	0	0	0	0	0	0	0	0	0	0	0
54b8f6cf798ca03255dac2fff2fa2e77	0	0	19	13	0	0	0	0	2	0	0	0	0	7	0	21	0	6	0	5	0	0	12	25	0
6a72c1561eb9e03793fceaae5de77afe	0	0	0	0	0	0	0	0	0	0	0	0	0	0	0	0	0	0	0	0	0	0	0	0	0
97f95ba702dbb580f76ef9abbb00cd2f	0	0	0	0	0	27	0	0	0	0	0	0	0	0	0	0	0	11	26	22	0	11	0	0	0
bce71cf56c53dd06383c00d57fb4bea1	0	0	0	0	18	0	0	0	8	0	0	26	0	0	0	0	0	0	25	2	0	7	0	0	26
537e6ee0091268fd2fb447c51c4c285f	0	0	0	0	0	0	0	0	0	0	0	0	0	7	0	0	8	0	8	0	0	0	21	33	21
51ed28f92186fbe44bf3e35327832263	0	0	0	0	0	0	0	0	0	0	0	0	0	0	0	0	0	23	13	43	0	0	0	0	0
58f1ed998238bdd638fb41b92219b8ff	0	0	0	0	0	19	0	0	11	0	0	0	0	18	0	0	0	0	0	5	0	9	43	0	0
1bc8ee158e97420c7c6ed74df5eebf6a	0	12	0	0	3	0	0	0	10	0	0	8	27	0	0	0	0	0	0	0	0	0	8	0	0
82b31d49fe2e9a132b2587e9b7ab4495	0	0	0	0	0	0	0	0	0	0	0	0	0	0	0	0	0	9	0	37	41	20	0	0	0
b27176f167508bee007912f89be954b4	0	0	4	0	9	0	0	8	0	10	8	0	8	11	0	12	7	0	0	0	0	0	7	25	3
e14b4113cc6f9d08dc5a5d6a6e797ac9	0	0	0	0	0	0	0	0	0	0	52	0	0	0	0	0	0	0	0	0	0	0	0	63	0
9a4c72e181df7e8bb2cfb66c89c4d254	0	0	0	0	0	0	0	0	0	0	0	0	54	0	0	0	0	8	5	4	0	12	0	4	0
e7fab69e4a22619190f4967890686e76	0	0	0	0	0	0	0	0	0	0	0	0	0	83	0	0	0	0	31	0	0	0	0	0	0
e3b453c888e4c0d4fb8f3af8b9898d28	0	0	0	0	0	0	0	0	0	0	0	0	20	14	0	73	7	0	0	0	0	0	0	0	0
4b3009e1aa4fed00793605f181d64589	0	17	0	0	9	21	0	0	5	0	0	0	0	0	0	0	0	13	0	41	0	7	0	0	0
35cc9f93fdacc3d15be98ca43a138a6e	0	0	59	0	0	0	0	0	0	0	0	0	0	0	0	0	0	0	0	3	0	0	0	0	0
3adcb170602cd7fc359b75bf7c7f71a7	0	0	0	0	0	0	0	13	7	25	4	8	0	0	0	0	0	24	16	0	0	8	0	0	0
d51d1bad4e767823405bece1342a2ef2	0	0	0	0	0	0	0	0	0	11	0	0	0	0	0	0	0	0	0	0	0	0	0	20	41
2b7233311a4cf5c3c147bd98f071e8c1	0	0	0	0	0	0	0	0	0	0	0	0	14	97	0	2	0	0	0	0	0	0	0	0	0
1ff8a5d5606e1943fc3e1e7d5bddb5d7	30	0	0	0	69	0	0	0	0	0	0	0	0	0	0	0	0	0	0	0	0	0	0	0	0
267c8f4ad3b9580e1e74248897f9fce2	0	0	0	0	68	0	0	0	0	0	0	0	0	0	0	0	0	0	0	0	0	0	0	0	0
27e53dfbe43add1eacc3b1f6608e88ff	0	0	8	0	0	0	0	0	0	0	0	0	0	5	0	9	0	30	3	27	0	22	5	0	3
ef22f04fc86d4cb04e181ce563ee95f4	0	0	0	0	0	0	0	0	0	0	0	0	0	0	0	0	0	0	0	0	0	0	0	0	0
3c5501869704cdec7d85f530bcfacaee	0	0	0	0	0	0	0	21	9	9	0	11	0	10	0	0	0	0	0	0	0	8	0	33	0
d958c3335f0ca2974f7e8a10a306dfca	0	0	0	0	0	0	0	0	0	0	0	0	0	14	0	0	0	21	6	8	0	39	0	4	0
0a0f86e499ad0c0dac2a0b3061e9586e	0	0	0	0	0	0	0	40	0	0	71	0	0	0	0	0	0	0	0	0	0	0	0	0	0
199c5df50e3db996690096ff3df73d7a	0	0	0	0	0	0	0	0	0	0	0	0	0	111	0	0	0	0	0	0	0	0	0	0	0
fcc6fd50b6a0e17ec789165d86f509f6	0	12	0	0	0	0	99	0	0	0	0	0	0	0	0	0	0	0	0	0	0	0	0	0	0
c945805cd5515446c8e5ef37d0589884	23	0	0	0	0	17	0	0	0	0	0	0	0	0	0	0	0	0	3	0	5	0	0	0	0
5fb5edbcb2bd62885bc5ad54289c6237	0	0	0	28	0	0	0	0	0	0	0	0	0	0	0	0	0	0	0	0	0	0	38	29	15
0e0ab2b071a3070e23d9ca1cf2c477f0	0	0	0	0	0	0	0	9	0	0	12	42	0	0	0	0	0	0	0	0	0	0	0	0	0
c4b535a5d6f274a57092278e2595ebda	0	0	0	0	110	0	0	0	0	0	0	0	0	0	0	0	0	0	0	0	0	0	0	0	0
ad0140e97b44feba274a4dc4ac374781	0	3	0	5	0	0	0	0	3	2	8	0	7	9	0	0	7	6	0	11	10	0	2	6	0
b1e1448dadb6410dee32a34ab047670f	0	0	0	7	0	0	0	0	0	0	0	0	0	4	0	0	7	6	4	3	0	6	11	16	33
04029fa126bae6c012e48744f3034f66	0	0	0	0	0	78	25	0	0	0	0	0	0	0	0	0	0	0	6	0	0	0	0	0	0
9a283112a8e66d53c152ec4733a62d49	0	7	0	0	82	8	0	0	0	0	0	0	0	0	0	0	0	12	0	0	0	0	0	0	0
2454c8a4b70e8001e4e8a6fe7d59b1c8	0	0	0	0	95	14	0	0	0	0	0	0	0	0	0	0	0	0	0	0	0	0	0	0	0
9328cc0eb2651b7bcff3bc782cb96fb2	0	0	0	0	0	0	0	0	0	0	0	0	0	0	0	0	0	44	0	0	0	64	0	0	0
1847470f9dd1f5dc0b402a6215147d07	0	0	0	0	0	0	0	13	12	0	49	0	0	0	0	0	0	0	0	0	0	0	0	0	0
479014d9cf478c937563dcdc64f1ddee	0	0	0	0	0	0	33	0	0	38	37	0	0	0	0	0	0	0	0	0	0	0	0	0	0
b27bb504651c1c804a0705b091d41a8f	0	0	0	0	0	0	0	0	0	0	0	0	0	0	0	0	0	47	0	60	0	0	0	0	0
020d038ed0e773d1e70653fcb1f87452	0	0	0	0	0	0	0	0	0	0	0	0	0	0	0	0	0	43	15	0	0	42	0	4	0
41f8211cad1fc5f244e38aef2afe0389	0	0	0	0	0	0	0	18	13	12	36	0	0	0	0	0	0	0	0	0	0	0	0	0	0
b538818ef3b90d51ec387b705c00f11b	0	0	0	0	0	0	0	21	11	54	0	10	0	0	0	0	0	0	0	0	0	0	0	0	0
a0531dd9a55b90c3599ffc2f0ddd113f	0	0	0	0	0	0	0	32	0	7	58	0	0	0	0	0	0	0	0	0	0	0	0	0	0
2742024410d3ba0a12da34896fdc5e39	0	0	0	0	0	0	0	0	0	0	0	0	0	0	0	0	0	8	14	31	0	0	0	0	0
ee246209a24836ee4d7b1c80948fd0b8	0	0	0	0	3	0	0	0	11	0	0	0	0	0	0	0	0	17	9	0	0	25	0	0	0
9f22da56e873ade2c09013cae621e715	0	0	4	10	0	4	6	0	0	0	0	3	9	9	0	0	5	4	0	0	0	3	16	12	10
f372e8326b83fcdcbac08a5cf64900df	0	0	0	0	0	0	0	0	10	0	85	0	0	0	0	0	0	0	0	0	0	0	0	0	0
87af9fe90f32ecc41f79101d529a1564	0	0	0	0	0	0	0	0	0	0	0	0	0	0	0	0	0	0	0	10	32	31	0	0	0
46ea82fde3a0a36fdea6007da1d2f4ba	0	0	0	0	5	0	0	0	0	0	0	0	0	0	0	0	0	37	12	14	0	37	0	0	0
87677f60ffb73d4c0108421565ba3a13	0	0	0	0	0	0	0	27	37	0	41	0	0	0	0	0	0	0	0	0	0	0	0	0	0
c3079bc462abbfe2545d5f27702f9a5f	20	20	0	0	30	35	0	0	0	0	0	0	0	0	0	0	0	0	0	0	0	0	0	0	0
532fa3cc7e8857ea5929ae372735ab47	30	0	0	0	37	0	0	0	0	0	0	0	0	0	0	0	0	0	0	0	0	0	0	0	0
c9938c70861e3f5654180ba05d4bbe0a	0	0	0	0	0	0	0	0	0	0	0	0	0	9	0	22	11	0	0	0	0	0	16	15	17
fde5200303935345d27317e0fe8005ae	0	0	11	11	0	0	0	0	0	0	0	0	47	0	0	14	14	0	0	0	0	0	0	0	0
651a39130899c705e5299ed6b918d367	0	0	0	0	0	24	0	0	0	15	0	0	18	18	0	29	0	0	0	0	0	0	0	0	0
8aae96134ff874a0823c4815e60201ee	0	8	0	0	17	11	0	0	0	0	0	0	0	0	0	0	0	24	21	12	0	0	0	0	10
ac216a190398d4afeace9da125053883	0	0	0	0	0	0	0	0	0	0	0	0	0	18	0	43	22	0	20	0	0	0	0	0	0
9ebdf4dee36f56d0d73b9869893c4b95	0	0	0	0	0	0	0	0	0	0	30	0	44	0	0	0	0	0	0	0	0	0	0	0	0
0ff1d047ebeaa7182dc7d60a3bf7fd22	0	0	0	0	16	10	0	0	30	0	0	25	0	0	0	0	0	0	0	0	0	0	0	0	0
ee3e055ade749ce8b700d61002094e30	0	0	0	0	0	0	0	0	0	0	0	0	0	0	0	0	0	0	0	0	0	0	0	0	0
6dc77024f121b7c229ca0c12e21b5444	0	0	0	0	0	52	51	0	0	0	0	0	0	0	0	0	0	0	0	0	0	0	0	0	0
372f7eed88ff0358cc47118e84cb8e6a	0	0	0	0	29	0	74	0	0	0	0	0	0	0	0	0	0	0	0	0	0	0	0	0	0
c0f247b2330dde78335a646849f8dfd5	9	0	0	0	0	0	0	0	4	0	0	0	2	0	0	0	0	23	21	14	0	11	0	0	0
7d2a92db1715cbeeae38f70f0748ad61	0	0	0	0	0	0	0	0	0	0	0	0	0	0	0	0	0	16	23	0	0	34	0	0	0
0b9964cd9e1a755aebad678b090a273e	0	0	17	9	4	0	0	0	0	0	0	0	12	7	0	19	0	0	0	0	0	0	0	21	4
ebab0b26239d88db37b5992794f17cd0	0	0	0	0	0	3	0	0	7	5	0	6	31	0	0	0	0	3	0	0	0	0	0	0	0
4ed8670f4520b9c8beb901a8015ca59e	0	0	0	0	0	0	0	0	0	0	0	0	0	0	0	0	0	38	15	0	0	48	0	0	0
06845950cb839ada518fc1bf8717aa04	0	0	0	0	0	0	0	0	0	0	0	0	0	0	0	0	0	38	44	0	0	19	0	0	0
e3d03f209084edfa34a84eae36adad02	0	0	0	0	0	0	0	0	0	0	0	0	0	0	0	0	66	0	0	21	0	0	13	0	0
0779587b9fb1cf65583c563ac349c115	0	0	0	0	0	0	0	0	0	0	0	0	0	0	0	0	0	43	44	13	0	0	0	0	0
563e4387216702a85574c31b1b5b8c80	0	0	0	0	0	0	0	0	0	0	0	0	0	0	0	0	0	0	0	0	0	20	23	24	21
2746c50869f3650953dc2f514fa91d88	0	45	0	0	12	0	0	0	6	0	37	0	0	0	0	0	0	0	0	0	0	0	0	0	0
fadb6a291cfd2fddaf65d146f3ea80b2	0	9	0	0	14	11	36	0	0	0	11	3	0	0	0	0	0	0	0	0	0	0	0	0	0
183c654fa29347f9bb086746c176655e	0	23	0	0	48	0	12	0	0	0	0	13	0	0	0	0	0	0	0	0	0	0	0	0	0
31795f798ef50fa8316c8168bd165d09	0	0	0	0	0	0	0	0	0	0	0	0	0	0	0	0	0	32	13	0	0	54	0	0	0
4fefdf9ff04ca4b388ca02c6930d5531	0	0	0	0	0	0	0	0	0	6	19	0	0	23	0	0	8	0	0	0	0	0	21	0	22
f9dd2ece5823f45f8c44f8dcaf38509b	0	16	0	0	14	19	50	0	0	0	0	0	0	0	0	0	0	0	0	0	0	0	0	0	0
deb2027d2d9c738c625887dd070fe070	0	22	0	0	25	52	0	0	0	0	0	0	0	0	0	0	0	0	0	0	0	0	0	0	0
4ac75f58e587b6544b093fedc34b7373	0	0	0	0	0	0	0	0	0	0	0	0	0	0	0	0	0	23	17	28	0	9	19	0	0
5db237584535298df6dd727d2010ec53	0	0	0	0	23	0	0	0	0	0	0	12	16	0	0	0	0	0	0	12	0	0	0	22	13
396da0e5e0f26f73a5dab3b50b4f8904	0	0	0	0	0	0	0	0	0	0	0	0	0	0	0	0	0	42	30	19	0	6	0	0	0
9d6fe45dc9242b74ca6a4cc03fd42741	0	0	0	0	0	0	0	0	0	0	0	0	0	0	0	0	0	0	11	15	0	0	0	31	0
4ad8cbc07ad239933ebbf29e1b913db5	0	0	18	0	0	0	0	0	0	0	0	0	5	12	0	26	0	10	0	3	0	0	12	11	0
59ea3908e1de6a7f0c4789e8e3b767cd	0	0	0	0	0	0	0	0	0	0	0	0	13	0	0	13	0	33	14	0	0	8	0	0	0
459764fef7bf8ff1064c01652c427c61	55	0	0	0	0	0	0	0	0	0	0	0	0	0	0	0	0	0	0	0	0	0	0	0	0
dfe9ac7365cdf0edb64d506788848c68	0	0	0	0	0	0	0	0	0	0	0	0	0	0	0	0	0	0	0	0	0	0	0	0	0
c720ba5ebbac3006e14a397be12d78fa	0	0	0	0	0	0	0	0	0	0	0	0	0	0	0	0	0	30	0	66	0	0	0	0	0
07ffc6ebabe04c7c960c5d345b3cb413	0	0	0	0	8	0	0	0	0	0	0	0	0	0	0	0	0	0	0	6	0	0	30	30	0
027a3c2d309b281a7203213358a0093b	0	5	0	0	3	5	5	0	0	0	0	0	0	0	0	0	0	0	0	0	0	0	4	14	25
faaf859ea67193f0c77703da702bd3f3	0	0	44	23	0	0	0	0	0	0	0	0	0	0	0	0	0	0	0	0	0	0	0	13	0
6f4eb45f97c32dd354adb911a5e731f9	0	0	26	34	0	0	0	0	0	0	0	0	0	0	0	0	0	0	0	0	0	0	12	24	0
1747f3dda8ad44791fc442c99bab5934	0	0	0	0	0	0	0	0	16	0	0	28	0	0	0	0	0	11	10	0	0	0	0	0	0
8d2c369f49b3b611509e928f3ea53452	0	0	0	0	35	0	0	0	0	0	0	0	0	0	0	20	0	40	0	0	0	0	0	0	0
4d5f4205ca56b2d0e2e389873d4e98ae	0	0	5	5	0	0	0	0	0	0	0	0	3	13	0	13	9	0	0	0	0	0	24	15	8
812f1be5ff4e03a7fa750c991dba0f60	0	0	0	0	0	0	0	0	43	0	0	40	0	0	0	8	4	0	0	0	0	0	0	0	0
b2e6c9e3e5938395341d11bbee5b302e	0	0	0	0	0	0	0	0	0	0	0	0	53	0	0	0	42	0	0	0	0	0	0	0	0
e19e07351ddbe8e07ec44f0c63e1b6f6	0	5	0	0	2	9	0	0	0	0	0	0	5	6	9	6	3	14	7	17	0	0	4	0	0
93835091d5fcbc1471ee30351fc6708c	0	0	10	0	0	0	0	0	3	3	19	0	0	0	0	0	0	0	0	14	9	9	18	0	0
909b37dc66ca4d7602b6bfddefbec912	0	0	0	0	0	0	0	0	0	0	0	0	0	0	0	0	0	0	0	93	0	0	0	0	0
d2ad8809cbbeb7e466f4380c6a7da4f1	0	24	0	0	51	0	0	0	0	0	0	0	0	0	0	0	0	0	0	18	0	0	0	0	0
edbccb321bac535e4f3b70a89465e380	0	0	0	0	0	0	0	0	0	0	0	0	0	0	0	0	0	0	0	0	0	0	0	0	0
f633453da568a178fb2a7076723251e0	0	0	5	0	0	0	0	0	0	0	5	0	0	0	7	0	0	19	0	22	0	0	11	19	4
ca6440ab9998c051357211527ba0c0b1	0	0	0	0	0	0	0	0	0	0	0	0	0	71	0	0	0	0	0	0	0	21	0	0	0
b4e5a4ba1bdf76613c38038976f1b1ed	0	0	19	0	0	0	0	0	12	8	0	0	0	0	0	0	0	0	0	0	0	15	17	0	0
9e19bf2d79667b0ad1603ef14448cc8f	0	0	0	0	0	0	0	0	0	0	0	0	0	0	0	0	0	21	55	0	0	16	0	0	0
2eda8ec4aeeb6e40088992341bfd7d10	0	0	0	0	0	0	0	0	12	12	0	27	0	0	0	0	0	0	0	0	0	0	0	0	0
53a2f30af55970801e0fa6f975ecd526	0	0	0	0	0	0	0	0	0	0	0	0	0	0	0	0	0	67	0	0	0	24	0	0	0
16665b4b24fcea00d2ac94c908218b9a	0	0	0	0	0	0	0	0	11	13	7	0	6	0	0	0	0	0	0	0	0	0	15	9	10
6e647fb4a36312676aafc7826e781caa	0	0	0	0	0	0	0	0	0	0	0	0	0	0	0	0	0	0	58	0	0	32	0	0	0
bef7ef7defd6464d1b5e111e95238876	0	7	0	2	15	0	4	6	0	8	8	7	0	3	0	0	0	0	0	0	0	0	0	0	0
b6205749b4c2b9a13b64806df7c1de00	0	0	0	0	0	0	0	0	0	0	0	0	0	0	0	0	0	0	0	0	0	0	90	0	0
4d11178b39e462ace82da7d0193515fc	0	0	0	0	34	21	0	0	0	0	35	0	0	0	0	0	0	0	0	0	0	0	0	0	0
2f15e19640cb91e712a34d2ffbb9b73e	0	0	0	0	0	0	0	0	3	0	0	0	0	0	0	0	0	5	0	0	44	10	0	0	0
73f60cfcc3d6a46cf4f678c2c3f6d0a1	0	0	0	0	0	0	0	0	0	0	0	0	0	0	0	0	0	15	51	0	0	23	0	0	0
a15c341902e2b2b2eecd4b223187c915	0	0	0	0	0	0	21	0	0	0	0	0	0	0	0	20	0	22	0	0	0	0	0	0	0
cfd22cd180a3ace67436b45dcaf639f8	0	5	0	0	0	0	8	0	12	0	4	12	0	14	11	7	0	0	0	0	0	0	0	0	0
d814e93568a1802806dcc8a70ea5bf91	0	0	0	0	0	0	89	0	0	0	0	0	0	0	0	0	0	0	0	0	0	0	0	0	0
4316e9f0ae5413eabb36266e3639fe0a	0	0	0	0	0	0	0	0	0	0	0	0	69	0	0	0	0	4	15	0	0	0	0	0	0
51a7fda31e089136649a066551956029	0	0	0	0	60	0	0	0	0	0	0	0	0	0	0	0	0	0	0	0	0	0	0	0	0
35b1f4ff9ac811d5e75f4423e0bf203e	0	0	0	0	0	0	0	23	0	0	65	0	0	0	0	0	0	0	0	0	0	0	0	0	0
c10d61ce6c92904e3f84d44abb119c3c	0	0	0	0	0	0	0	0	0	0	0	0	88	0	0	0	0	0	0	0	0	0	0	0	0
ef9ea917dea9ddbf9f51abecc649e034	0	53	0	0	0	10	25	0	0	0	0	0	0	0	0	0	0	0	0	0	0	0	0	0	0
ec699f1d9866a6c342f442a2c1b8e35d	0	0	0	0	0	32	0	0	0	0	0	0	0	0	0	0	0	0	0	0	0	0	0	0	0
a41b72842290a9e865efc83d63ad2818	0	13	0	0	0	0	0	0	8	13	0	0	0	14	0	6	0	0	0	9	0	3	13	0	0
0dc0f37c198ea47125d1cab168a7b0ba	0	0	0	0	0	0	0	0	0	0	0	0	0	0	0	0	0	12	13	0	0	14	0	0	0
bedf1f108d8517585499533e05d0e845	0	0	0	0	0	0	0	0	0	0	0	0	0	0	0	0	0	37	25	0	0	25	0	0	0
3a5ed81ef9d7c07f2c540f43f7a99afd	0	0	0	0	0	10	8	0	0	44	0	0	0	0	0	0	0	0	3	0	0	0	0	0	0
73512cbbdd53abc6618b8c3751700034	0	0	0	0	0	0	0	0	0	0	0	0	0	0	0	0	0	24	7	0	0	0	13	18	9
799f9266e100087a49cec7ae4dfdb52e	0	0	0	0	0	0	0	0	0	0	0	0	0	0	0	0	0	87	0	0	0	0	0	0	0
e28fcbb320e2e2cd35d039c6d1faf69a	0	0	0	0	0	0	0	0	22	0	0	38	0	0	0	0	0	0	0	0	0	0	0	0	0
0130b0ed79c51ea4b306855ba1db4d12	0	0	0	0	0	0	0	0	0	0	0	0	0	0	0	0	0	0	34	0	0	52	0	0	0
17612878b835240319f2a5bd82bb20f2	0	0	0	0	0	0	0	0	16	0	0	9	0	0	0	0	12	0	0	0	0	0	31	0	0
da393f5b45290e8956dcb9d7eb472c69	0	0	0	0	23	0	0	0	13	0	29	15	0	0	0	0	0	0	0	0	0	0	0	0	0
bba62cd738539022461cac220ca87b65	0	0	0	0	0	0	0	0	11	0	0	38	0	0	0	0	0	0	0	0	0	0	0	0	0
e0f0292c8e1fb6c1ea2f92ff7da7190c	0	0	0	33	0	0	0	0	0	0	0	0	0	0	0	0	0	0	0	0	0	0	0	52	0
6d4b57fdc66733600bf40813dfe81303	0	24	0	0	15	15	0	0	0	0	20	0	0	0	0	0	0	0	0	0	0	0	11	0	0
5862010d67aa1ccb25966614967dab64	0	0	0	0	0	0	0	0	0	11	0	0	0	0	0	10	0	0	0	0	19	25	0	0	0
c8efc6a564db55fe3260b73696e021b3	0	0	0	0	0	0	0	0	0	0	0	0	0	0	0	0	0	16	21	36	0	0	0	0	0
f88abf04e724df8234d2fe9b05475e69	0	0	0	0	0	0	0	0	84	0	0	0	0	0	0	0	0	0	0	0	0	0	0	0	0
7e8874b85f6e99a082b0fd287c437f96	0	0	0	0	0	0	0	0	0	0	0	0	0	0	0	0	0	0	0	0	71	0	0	0	0
6383afc74ca7dcebc66bf9936b370a13	0	0	0	0	0	0	0	0	0	0	0	0	0	0	0	0	0	10	18	9	0	23	0	0	0
a68d631e26cbb745faee31be67d17124	0	0	12	10	0	0	0	0	0	0	0	0	0	0	0	0	0	0	0	0	0	0	9	19	17
914bfb4d12105271896d7932d3c12566	0	0	22	31	0	0	0	0	7	0	0	0	0	0	0	0	0	0	0	0	0	0	0	23	0
b1b1a1e623ed44c6a59da65b7aba9f85	0	8	0	0	0	0	0	0	0	0	0	0	18	12	0	0	45	0	0	0	0	0	0	0	0
8e3f95b310bb207aa5b77f6d3980ba73	24	9	0	0	18	2	0	0	0	0	0	0	0	0	0	0	0	0	0	0	0	0	0	0	0
96fde541d95e3dec329a7272db318af3	0	0	0	0	0	0	0	0	4	16	0	3	0	0	0	0	0	17	5	21	0	6	0	0	0
65a84dbcff3a45df5f2e03a8da9d0a53	0	0	0	0	0	0	0	0	0	0	0	0	0	0	0	0	0	46	0	36	0	0	0	0	0
fd68ea082622eefd6a41b073e7a5bb05	0	0	0	0	0	0	0	0	0	0	0	0	17	0	5	6	0	6	9	0	0	0	14	0	14
601b97555ab02d89aa6808f967419c7a	0	0	0	0	0	0	0	0	0	0	0	0	14	39	0	29	0	0	0	0	0	0	0	0	0
bec98a455ca468ecdb44da940bf41f60	0	0	0	0	0	0	82	0	0	0	0	0	0	0	0	0	0	0	0	0	0	0	0	0	0
06642401e167ce755826c8a252581b4b	0	0	0	0	0	0	0	0	0	0	0	0	0	0	0	0	0	0	9	0	26	29	0	0	0
60feff4d1108323130a4dbab8e031530	0	0	0	0	0	0	0	0	0	0	0	0	0	0	0	0	0	0	0	0	0	26	0	0	0
9e600a723d1b9216a510fe8ebb728391	0	0	0	0	0	0	0	0	0	0	0	0	0	0	0	0	0	29	35	0	0	17	0	0	0
002c39f456cd26fcb0224def38aae001	0	0	0	7	0	0	0	0	0	0	0	0	0	0	0	0	0	0	0	0	0	0	18	8	22
10f997b455885f02be62dfd4e5ca16d4	0	0	0	0	0	0	0	0	0	4	0	5	0	20	0	0	0	0	0	0	0	0	26	26	0
542eac36b9d5158e8a94b01d8bba5aaa	0	35	0	0	46	0	0	0	0	0	0	0	0	0	0	0	0	0	0	0	0	0	0	0	0
f5f3c968d713328d224d18e0ef03997c	0	0	0	0	0	0	0	0	0	0	0	0	0	0	0	0	0	0	0	80	0	0	0	0	0
c1872e571cca1f147c7b58dab148f17d	0	0	0	0	0	0	0	0	0	0	0	0	0	0	0	4	0	7	0	11	0	9	28	0	0
a35e945b2fc8f6da8f70702bb591f037	0	3	0	0	13	20	0	0	0	0	17	0	0	5	0	0	0	0	0	0	0	0	0	4	0
18844e6c9f0be427f918f08bf69fd0ed	0	10	9	0	5	0	0	0	0	0	0	0	9	10	5	10	2	0	0	0	0	0	0	8	8
65ac51910c1e36b67f796b87cf88d505	0	0	0	0	0	0	0	0	35	0	0	45	0	0	0	0	0	0	0	0	0	0	0	0	0
1d3f9b0f976448d3650da00b8d337a3f	0	0	0	0	0	0	0	39	0	0	35	6	0	0	0	0	0	0	0	0	0	0	0	0	0
346188f1e17ac30319baccefe8e71ea0	0	0	0	0	0	28	0	27	0	0	25	0	0	0	0	0	0	0	0	0	0	0	0	0	0
7946b1d4e65a5158894fcefa1e769f1f	0	0	0	0	0	0	0	0	0	0	0	0	0	0	0	0	0	0	0	0	0	0	0	0	0
227d7dff585cc590ae4617800d22bd61	0	0	0	0	0	0	0	0	0	0	0	0	0	0	0	0	0	27	0	52	0	0	0	0	0
f648a0a132663431803c41a8635b2678	0	0	0	0	0	0	0	0	0	0	0	0	0	0	0	0	0	0	0	0	0	43	0	0	0
013026174466cf25d71e8349565d5e1b	0	0	9	5	0	0	0	0	9	6	0	0	15	0	0	23	0	6	4	0	0	0	0	2	0
aeb45d4555a30e901eb50596beac8c88	0	0	0	0	7	26	0	0	0	0	0	0	34	0	0	0	0	0	0	0	0	0	0	0	12
81e307e0a7c18acb52ee39fe5f015d6e	0	0	0	0	0	0	0	32	0	47	0	0	0	0	0	0	0	0	0	0	0	0	0	0	0
44c7f3537270b834a40cc513018d130a	0	0	0	0	0	0	0	0	0	7	34	23	0	0	0	0	0	0	0	0	0	0	0	0	0
7977476f0e202587e46f6fa8b81b4d36	0	18	0	0	17	20	0	0	0	0	0	0	0	0	0	0	0	0	0	0	0	0	0	0	0
bebbaab245610038d33d5813ef3d757a	0	0	0	0	0	0	0	0	0	4	0	7	14	0	6	0	0	0	7	10	0	0	0	7	0
6275232859afef8b494443be36b77575	0	0	0	0	0	0	0	0	0	0	0	0	0	0	0	0	0	41	15	9	0	13	0	0	0
dba5e4cb8840a312cbe60925bd93ef41	0	0	0	6	0	8	0	0	0	0	0	0	33	0	0	13	0	5	9	0	0	0	0	4	0
ccb9bb69580a14b8705dcbc418be5d95	0	0	14	0	0	0	0	0	0	0	0	0	0	0	0	0	0	5	3	0	0	0	37	9	0
57b35a94b0dd42a6655db16187181889	0	0	0	0	0	0	0	26	0	52	0	0	0	0	0	0	0	0	0	0	0	0	0	0	0
b4f1d547e733e2a8aed6f6ff732c380a	0	0	0	0	0	0	0	0	0	0	0	0	0	0	0	0	0	30	7	28	0	12	0	0	0
298293ca3dd90b7d5b7c3fd311935b6a	0	0	0	0	0	0	0	0	6	0	4	0	4	0	0	5	0	4	0	5	0	13	8	5	0
a4c23f9a401d13831617aa23733968e4	0	4	0	3	0	4	0	0	5	6	7	5	6	10	0	0	0	5	0	9	0	0	0	0	0
5be78f429e0ef9274069443f7f112867	0	0	0	0	0	0	0	0	0	0	0	0	0	0	0	0	0	47	0	0	0	30	0	0	0
e7c47ba1289bbc88c390979e4a6bd8ff	0	0	0	0	0	0	0	0	13	21	0	0	0	0	0	0	0	0	0	0	0	0	0	0	24
aba1a7be70e666aa95fe691f23766a1d	0	0	0	0	0	0	0	0	0	0	0	0	22	0	0	38	17	0	0	0	0	0	0	0	0
b1c049aeefb630fe2937b155523c6e97	0	0	0	0	0	0	0	0	0	0	0	0	0	0	0	0	0	0	18	0	29	0	0	0	0
22951c6f54a3d1b3a59fe0c99f71b11b	0	0	0	0	0	0	0	0	0	0	0	0	0	4	0	0	0	7	6	10	0	5	11	25	8
c691d776ad6760f1449b089d9f1647dd	0	0	0	0	0	0	0	0	0	0	0	0	0	35	0	0	0	22	0	0	0	19	0	0	0
dde25cd0687e4a22a08181b293be379d	0	0	43	0	0	0	0	17	0	0	0	0	0	0	0	0	0	0	4	0	0	0	0	0	0
81d9fec8cc93ef15d9a56e6f1a553fb4	0	0	0	0	0	0	0	0	0	0	0	14	0	0	0	0	0	6	0	0	0	0	0	31	25
33d66eced7718dd523639c7b74472b3f	0	10	0	0	13	5	29	0	0	7	0	0	0	12	0	0	0	0	0	0	0	0	0	0	0
cc0aef76818a7785738d45111edd77be	0	0	0	0	0	0	0	0	11	10	17	8	11	0	0	0	0	4	0	9	0	0	0	0	0
feea9e6848a906a0da67ac5a3e4cab88	0	0	0	0	0	0	0	0	0	0	0	0	0	0	0	0	0	0	0	0	0	34	0	0	0
763b6677c9381b4d162f5541912369d6	0	0	0	0	0	0	23	0	0	0	0	0	0	28	0	0	0	0	0	23	0	0	0	0	0
4101ed0e2b7295fe05e3bd089901fb21	0	0	0	0	0	0	0	0	0	0	0	0	0	0	0	0	0	0	0	0	0	0	0	0	0
db9adca212e58fbe5cbeaba4081d53ef	0	0	0	0	0	0	0	0	0	0	0	0	0	0	0	0	0	39	17	0	0	18	0	0	0
e0a8108a067566d92ae9d886db885d26	0	0	0	24	0	0	0	0	0	0	13	0	0	0	0	0	0	0	0	0	0	0	0	37	0
ec81c78dd571d5e77aab2f8afd3ad04e	0	0	0	0	0	0	0	0	27	0	28	0	0	0	0	0	0	0	0	0	0	0	0	0	0
6cf73d8e136aa5fef6dc01e2a5a4956a	0	0	0	0	10	25	0	0	0	0	9	0	0	0	0	24	0	0	0	0	0	0	0	0	0
b6ece38b89e5fd15059e280e41699bcc	0	0	0	0	74	0	0	0	0	0	0	0	0	0	0	0	0	0	0	0	0	0	0	0	0
de493dcb2f62ed5803d6e5666fc9f38b	0	0	0	0	0	0	0	0	0	0	0	0	0	0	0	0	0	13	16	30	0	14	0	0	0
eb4b55682f45b0b92b476d2dbf64aa93	0	0	0	0	0	0	0	0	0	0	0	0	0	0	0	0	0	35	10	17	0	11	0	0	0
14501e801a03e0ecf26a4111206d4cbb	0	8	0	0	14	14	0	0	0	0	6	0	0	0	0	0	0	11	10	0	0	10	0	0	0
6e7078fe87c9fd8aa5bb04a2ded8887d	0	0	0	0	0	0	0	0	0	0	0	0	0	0	0	0	0	0	73	0	0	0	0	0	0
814b38f6d62472ad42e0fcaa8527319a	0	0	0	0	0	0	0	0	0	0	0	0	0	12	10	0	0	13	0	0	0	0	0	30	0
e538f46ad7f4c24dfd4874ad30d1e763	0	0	0	0	0	0	0	11	13	6	15	17	0	0	0	0	0	0	0	0	0	0	0	0	0
9ee087c6b9c676a7452a464d3ab508cd	0	6	0	0	6	8	9	0	3	2	22	0	0	0	0	0	0	0	0	0	0	0	0	0	0
399dd48eb068d94f87aedf280a5edff3	0	0	0	0	25	0	0	0	0	0	0	0	0	0	0	0	0	0	0	0	0	0	0	0	0
227a42dbba44bde502d0cf965a15953c	0	48	0	0	0	0	25	0	0	0	0	0	0	0	0	0	0	0	0	0	0	0	0	0	0
cfec875a97c330ce86668ce2719fac4b	7	0	0	0	0	0	4	17	0	5	0	0	0	4	20	0	0	0	0	0	15	0	0	0	0
4179aa0cbd75e8fa60a2ad9406512099	0	0	0	0	0	0	0	0	0	0	0	0	0	0	0	0	0	0	0	28	0	12	0	0	0
9e6744d59f11e26a7f6f65409196f546	0	0	0	0	0	0	0	0	15	0	16	10	0	0	0	0	0	15	0	9	0	0	0	0	0
398e187a37f228e5a0693ce60c4c0eef	0	21	0	0	0	3	0	0	0	14	0	34	0	0	0	0	0	0	0	0	0	0	0	0	0
1ff51284a21b5139502e98e730de30e8	0	0	0	0	46	26	0	0	0	0	0	0	0	0	0	0	0	0	0	0	0	0	0	0	0
b7ee2239d659ec0d8a257624b1f99ab6	0	0	0	0	0	0	0	0	0	0	0	0	0	0	0	0	0	7	8	12	22	16	0	0	0
f95246f3724ba7d1adec8615eb68912e	0	0	0	5	0	0	0	0	6	8	12	9	9	0	0	0	0	0	0	0	0	0	3	5	4
aba1e2f954e5257e3022d78586098f62	0	0	0	0	0	71	0	0	0	0	0	0	0	0	0	0	0	0	0	0	0	0	0	0	0
29220ed87799556f8c7f8267a80c2de6	0	18	0	0	37	0	0	0	0	0	0	0	0	0	0	0	0	0	0	0	0	0	0	0	0
238a289e3e2f5de10b21e45acfa87251	0	34	0	0	37	0	0	0	0	0	0	0	0	0	0	0	0	0	0	0	0	0	0	0	0
417ee6799f70056ac9e353e91167e391	0	0	0	0	0	0	0	0	0	0	0	0	0	0	0	0	0	29	0	33	0	8	0	0	0
062602ded64fc67f04e061fa0b8f83ac	0	0	0	0	0	0	8	0	0	0	17	0	0	0	0	0	0	0	23	22	0	0	0	0	0
4a5504729f9454aac755527a87905848	0	36	0	0	0	0	0	0	0	0	0	0	0	0	0	0	0	0	0	0	0	0	0	0	0
aadd4ae968cb9d7ed721adecde6d33cf	0	0	0	0	0	0	0	0	0	0	0	0	0	0	0	0	0	22	30	4	0	13	0	0	0
94e40b9bc0f77cbdaffb21d48c6b1008	0	0	0	0	0	0	0	0	0	0	0	0	0	0	0	0	0	0	0	25	0	0	0	0	0
f8e8b52da2366b110b6be0f5d3def785	0	0	0	0	0	0	0	0	0	0	0	0	0	0	0	0	0	0	0	0	0	69	0	0	0
480144965a370ebb2343c46a19cd3dd5	0	0	0	0	0	0	0	0	0	0	0	0	0	0	0	0	0	0	69	0	0	0	0	0	0
f21fce9d8fcf92184149fcdac38e846d	0	0	10	18	3	12	8	0	0	0	0	0	0	0	0	11	0	0	0	0	0	0	0	0	0
d7a9a99a2a2c606fc97331d975a40839	0	0	0	0	69	0	0	0	0	0	0	0	0	0	0	0	0	0	0	0	0	0	0	0	0
e951fcce51f3320938e1dcf4aba325c0	0	0	0	0	0	0	0	0	0	0	0	0	7	0	0	0	0	13	0	31	0	0	0	0	0
56e528324e55df503ccd2a194d2c03eb	0	0	0	20	0	0	0	0	16	0	0	0	0	0	0	0	0	7	0	0	0	0	0	25	0
254c9581bd0dc4feaac353ed4ae3d1b6	0	0	21	16	0	0	0	0	0	0	0	0	0	0	0	0	5	0	0	0	0	0	0	17	0
41fed59664973d51555a7423188542b5	0	0	0	0	0	0	0	0	0	0	0	0	5	2	12	0	3	0	0	0	0	0	4	35	0
fbadec677735af4925d9071e2bbfb6b5	0	0	0	0	0	0	0	0	0	0	0	0	10	10	0	27	0	0	0	0	0	0	0	0	21
3a931039af24a74567c403a4a8c6e197	0	0	0	0	0	0	21	0	0	0	0	0	0	0	47	0	0	0	0	0	0	0	0	0	0
afec9389fcd587bde0806950ee71605a	13	12	0	0	3	10	19	0	0	0	0	0	0	0	0	0	0	0	0	0	0	0	0	0	0
995939cdc055f5fab019832f04641823	0	19	0	0	23	26	0	0	0	0	0	0	0	0	0	0	0	0	0	0	0	0	0	0	0
df17811d9c448bce4e0bf5d97a847f8c	0	6	0	0	9	0	0	15	0	30	0	0	0	0	0	0	0	0	0	7	0	0	0	0	0
5134ff14bd90222bee5e68a7237d5883	0	0	0	0	0	0	0	0	0	0	0	0	0	0	0	0	0	35	0	32	0	0	0	0	0
2be359915fed0cacc6c9cf6e336b33cc	0	0	0	0	0	0	0	0	9	12	0	0	9	10	0	0	0	0	0	0	0	0	0	0	0
ce1375693cfc4444f61ac4c37e8533a2	0	0	0	0	26	0	0	0	31	0	10	0	0	0	0	0	0	0	0	0	0	0	0	0	0
341644d1b4cfd7b2d8c078812dec2096	0	0	0	0	0	0	0	0	0	0	0	0	0	35	0	32	0	0	0	0	0	0	0	0	0
9e4499d2cce1975ccdfc2f403d641676	0	0	0	0	0	67	0	0	0	0	0	0	0	0	0	0	0	0	0	0	0	0	0	0	0
2f63f9f0dcf41cee937d88fd947426b1	0	0	0	0	0	0	0	7	0	0	0	0	5	5	0	0	0	26	0	0	0	16	7	0	0
9acc087f082577d35557426b5369efe6	0	0	0	0	16	0	0	0	0	0	0	0	0	0	0	0	0	0	0	0	0	0	0	0	50
ed48d58886b75a086d4099d87d6eb72c	31	4	0	0	0	0	8	0	0	0	0	0	0	0	0	0	0	0	0	0	0	0	0	0	0
44e3fdc3ae60e3ee9cf27b708e2fdace	0	0	0	0	0	0	0	0	22	23	0	0	0	0	0	0	0	0	0	0	0	0	0	0	0
09b56151935df53023f7ef4147462eb8	0	0	0	0	0	0	0	0	0	0	0	0	0	37	0	7	0	0	0	0	0	0	0	0	2
fc9f091ae4613afbbc389880187ef5d1	0	0	5	0	0	0	0	0	0	3	0	0	8	13	0	12	0	0	0	0	0	0	4	11	9
aaa5f9bc0d318d7889566d56644544bd	0	37	0	0	0	14	0	0	0	0	0	0	0	0	0	0	0	0	0	0	0	0	0	0	0
128befc7e9c15a7d5348dbd93b173e91	0	0	0	0	0	0	0	0	0	0	0	0	0	0	0	0	0	0	0	0	22	20	0	0	0
7f6eaf3515a62df2cbb88fb9d7ab495c	0	0	0	0	0	0	0	25	0	31	8	0	0	0	0	0	0	0	0	0	0	0	0	0	0
6c7713c2c388fdff385df950f2214c85	0	0	0	0	3	0	0	0	0	0	0	0	0	0	0	0	0	0	0	0	0	0	0	0	0
7386971bf54a552dfb07068207037405	0	0	0	15	0	0	0	0	0	0	0	0	0	0	0	0	0	18	0	0	0	0	0	13	0
ab320ffbfb15cd952daeed6d7b09f215	0	0	0	0	0	0	0	0	0	0	0	0	14	0	0	0	0	0	0	0	0	0	0	21	12
376a98bc0173475219e5b617c33dc830	0	0	0	0	0	0	0	0	0	0	0	0	0	0	0	0	0	0	0	0	0	0	54	0	9
e9dd2a87f5953f116c2c67aa124eb1f9	39	0	0	0	0	0	0	0	0	0	0	0	0	0	0	0	0	0	0	0	0	0	0	0	0
f4c91eb23d6c366aac27df1456a0ba1a	0	0	0	17	0	0	0	0	0	0	13	0	0	0	0	0	0	0	0	19	0	0	0	0	13
1379f98336d00851313654a35adcdf44	0	0	0	0	44	0	0	0	0	0	0	0	0	0	0	0	0	7	11	0	0	0	0	0	0
72105f05ef86b56deb4cf951bdef62fa	0	0	0	0	0	0	0	5	7	12	0	6	5	6	0	0	0	0	0	0	0	0	10	7	0
40db79b650d8f39776b18a03076cc8c3	0	0	0	0	0	0	0	0	0	0	0	0	45	0	0	0	0	0	0	0	0	0	0	0	0
e378d6856e75159b513447ec354d07fe	0	0	0	0	0	0	0	0	0	0	0	0	0	0	0	62	0	0	0	0	0	0	0	0	0
5d5178b868ada84dd50a95921a4e84ac	0	0	0	0	0	43	19	0	0	0	0	0	0	0	0	0	0	0	0	0	0	0	0	0	0
a76f6e80c9e557b1c3644acb8a5dea69	0	13	0	0	13	15	0	0	0	0	0	0	0	0	0	0	0	0	0	0	0	0	0	0	0
0318fd321c2c4869daeee2ce3a4fe49f	0	0	0	0	0	0	0	0	0	0	0	0	0	0	0	0	0	4	0	55	0	2	0	0	0
7795fc130635d26b7adc48ba3eb53c8c	0	0	0	0	0	0	0	0	0	0	0	0	0	0	0	0	0	27	6	15	0	9	0	0	0
60314b5e141b2cceab07dd747f9c03a2	0	0	0	0	0	0	0	0	0	0	0	0	0	0	0	0	0	23	10	0	0	28	0	0	0
5486844b955bc4e258152e4e6e1e2b5b	0	0	0	0	11	0	0	0	0	0	0	0	0	0	0	0	0	23	0	0	0	27	0	0	0
142752bfb67f79db4bc7a51e3b7813a1	0	0	0	0	0	0	0	0	0	0	0	0	0	0	0	0	32	0	0	0	0	0	0	0	0
b85a62cea41081b122b7aaea932eca6a	0	0	0	0	0	0	0	0	0	0	0	0	0	61	0	0	0	0	0	0	0	0	0	0	0
b8542f3538781369a55093ec17ed32b1	0	0	0	0	0	14	0	0	0	0	0	0	0	47	0	0	0	0	0	0	0	0	0	0	0
d07016cea5e21f139b557490d43b4174	0	0	0	0	37	0	0	0	0	0	0	0	0	0	0	0	0	0	0	0	0	0	0	0	0
04cd7b62d8eca647cae11ad8ee33ce51	0	0	0	0	0	0	0	0	0	0	0	0	0	12	0	0	14	0	0	0	34	0	0	0	0
59050786de5a225eebdeb805a3d7384c	0	0	2	6	0	0	0	0	0	0	0	0	2	0	0	3	2	8	3	9	2	5	11	4	0
abd9c7c22e7dd8101c1faa4a98e7c8ac	0	0	0	0	0	0	0	0	0	0	0	0	0	0	0	0	0	0	0	27	0	18	0	0	0
a0eb5d332a22ee47c3159d481564e36d	0	0	0	0	0	0	0	0	0	0	0	0	0	0	0	0	0	0	27	22	0	0	0	0	0
f0bde2f54893276b9ba2239c532b706a	0	0	0	0	5	0	0	0	0	0	0	0	0	0	0	0	0	0	0	0	0	9	20	0	11
f9433c8e39e84beddb049b114b6c219a	0	0	0	0	0	0	0	0	0	0	0	0	0	0	0	0	0	21	9	0	0	30	0	0	0
4d2b7ae2d0d2464400620037a8e6aba1	0	0	0	0	0	0	0	0	16	0	0	0	0	0	0	0	0	0	0	0	0	0	0	0	0
3102ac9c1533e0b8f696da017ceb6c67	0	0	0	0	0	0	0	0	9	0	28	14	0	0	0	0	0	0	0	0	0	0	0	0	0
664edd799076257544e12e3bde28369f	0	0	0	0	0	60	0	0	0	0	0	0	0	0	0	0	0	0	0	0	0	0	0	0	0
146ece7983d63e1ce71309c01bceead0	0	0	0	0	0	0	0	0	0	0	0	0	0	0	0	0	6	0	3	14	0	0	0	0	11
cba24cce8abc8e3fc9c9ba44c768aec2	0	0	0	0	0	0	0	0	0	0	0	0	0	0	0	0	0	13	13	0	0	33	0	0	0
afbd6b9a8c7f98cdf198f1cea2ac699c	0	0	21	0	0	0	0	0	0	0	0	0	0	0	0	0	0	0	0	0	0	14	0	24	0
a6e86a7d10bceb14b1e3cd2ce343cd64	0	5	0	0	0	0	0	6	0	0	4	0	12	6	6	0	2	5	0	0	0	0	0	2	0
741eebab92377e12a3f7373a06cf6404	0	0	0	0	0	0	0	0	0	0	0	0	0	0	0	0	0	0	0	0	0	0	0	0	0
9e8ca0198c4dc45806a6f730048c2591	0	20	0	0	6	0	0	0	0	2	0	0	0	11	0	0	0	0	0	0	0	0	0	0	9
51b9f38e335491269e164e8b2b78a259	0	0	34	0	0	0	0	0	0	0	0	0	0	0	0	0	25	0	0	0	0	0	0	0	0
07f9faa9fc1bea101a51471be08d92ee	0	0	0	0	0	0	0	0	15	0	16	0	0	0	0	0	0	0	0	0	0	0	0	0	0
041cd59d2e59007859625aef9bdd52df	0	0	0	0	0	0	0	0	0	0	0	0	0	30	0	0	29	0	0	0	0	0	0	0	0
28772c9a8412c193df056d4cd6052685	0	0	0	0	0	0	0	0	16	0	0	0	0	0	0	0	0	0	27	0	3	12	0	0	0
88505238f9dec25a533389d0e8d55be8	0	0	0	0	0	0	0	0	0	0	0	0	0	0	0	0	0	0	0	0	0	6	0	0	0
7f813743f11cbcf4157ee3883ff4c6fc	0	0	0	0	0	0	0	0	0	0	0	0	0	0	0	0	0	20	0	0	0	0	0	0	0
48feed65e5d1040b15c61e74703475ae	0	0	0	0	0	0	0	0	0	0	0	0	0	0	0	0	0	34	12	0	0	12	0	0	0
6f4f9861152f1f8721a0abe2e327e945	0	0	0	0	0	0	0	0	0	0	0	0	0	0	0	0	0	18	20	0	0	20	0	0	0
3605299df07655417aac8325f4a11f5f	0	0	21	10	0	0	0	0	3	3	0	0	0	0	0	0	0	0	0	0	0	7	0	0	0
8c6e62132305540ef6bda3e040198c7c	0	0	0	0	0	0	0	0	0	0	0	0	0	0	0	0	0	0	0	0	0	0	0	0	58
93ec7f0eea59a89a4960c0d072c50247	0	0	0	0	0	0	0	0	29	0	0	29	0	0	0	0	0	0	0	0	0	0	0	0	0
b64b1d88b5e55ecd0c5cd3ea04e70b55	0	0	0	0	0	0	0	0	6	0	30	4	18	0	0	0	0	0	0	0	0	0	0	0	0
897e9b4087688494e4c65eea9a92c6ab	0	0	0	0	0	33	0	0	0	0	0	0	25	0	0	0	0	0	0	0	0	0	0	0	0
4313e227ab1a7147db8a0b86d9ef57b1	0	0	0	0	28	30	0	0	0	0	0	0	0	0	0	0	0	0	0	0	0	0	0	0	0
3d342b029d6ebd62fd7ae57dcf4a0e02	0	20	0	0	13	25	0	0	0	0	0	0	0	0	0	0	0	0	0	0	0	0	0	0	0
7997538af7c1a7c27a0418d10413fe6a	40	0	0	0	0	18	0	0	0	0	0	0	0	0	0	0	0	0	0	0	0	0	0	0	0
03a63a4a5b2321ff2f9cefe3c7b2bedd	0	0	0	0	0	0	0	0	0	0	0	0	0	0	0	0	0	0	0	50	0	7	0	0	0
30eceee198c4df19fc1df1cf9e9c9f11	0	0	0	0	0	0	0	0	5	0	0	0	0	13	0	0	0	15	0	24	0	0	0	0	0
812b93690ba8d0013f178f65dfcc76e7	0	0	0	0	0	0	0	0	0	0	0	0	0	0	0	0	0	31	12	0	0	11	0	3	0
507380621ed93e541f3ab1b30415ba29	0	0	0	0	0	0	0	0	0	0	0	0	0	0	0	0	0	13	24	0	0	20	0	0	0
740a3c8c8bafbffdad62ea2b8dc32e86	0	0	0	0	0	0	0	0	0	0	0	0	14	0	10	12	11	0	0	0	0	0	7	0	3
bf149212b429962a41cfd36987889fbc	0	0	0	0	57	0	0	0	0	0	0	0	0	0	0	0	0	0	0	0	0	0	0	0	0
f271421e84d90cb287cb9d5809c0d519	0	0	0	0	57	0	0	0	0	0	0	0	0	0	0	0	0	0	0	0	0	0	0	0	0
3c5f14f253774ba3e2fb333c2af09fed	0	23	0	0	0	0	0	0	0	0	0	0	0	0	0	0	0	0	0	0	0	0	0	0	0
a24b6e0996b9fbaa38610559ac923a17	0	0	0	0	0	0	0	0	0	0	0	0	0	0	0	0	0	18	12	15	0	11	0	0	0
4fe0414d8cae3f9933db97e73ce518a5	0	0	0	0	0	0	0	0	0	0	0	0	0	0	0	9	0	11	0	11	0	0	0	11	0
1b002895beb537ad3e3cf41fe794f05b	0	3	0	3	3	0	0	0	4	8	5	0	0	0	0	3	0	0	0	4	0	3	12	4	0
bbc9d3b3b4ee8cdd2bd01482aa2fda43	0	0	0	0	0	0	0	0	0	0	0	0	0	0	0	0	0	0	0	0	0	27	0	0	0
a3c2c76f8c3a15010273a0e9ba5da854	0	0	0	0	0	0	0	0	0	0	0	0	0	0	0	0	0	0	56	0	0	0	0	0	0
1056b804287b33f460bb073fabbe4c74	0	0	0	0	0	0	0	0	0	0	0	0	0	0	0	0	0	0	0	0	0	0	0	0	0
8624ecf65142f61c08f7c603735bc597	0	7	0	0	0	0	0	0	0	13	0	0	8	0	0	12	0	0	0	0	0	0	11	0	5
6ed3b780d31ebbf3ec0b37a401a04997	0	0	0	0	0	0	0	0	0	0	0	0	0	0	0	0	0	0	0	0	0	0	56	0	0
9bc6dd4efce1f1192065deede34e5c5c	0	0	0	0	0	0	0	0	13	22	10	0	0	0	0	0	0	0	0	0	0	0	0	0	0
b4cfb1d1921a36b4072e497439eaf92c	0	0	0	0	0	0	0	0	0	14	0	15	11	16	0	0	0	0	0	0	0	0	0	0	0
a7276d8d9c1f535c1e8d97aa42bcadc6	0	0	0	0	0	0	0	0	0	0	0	0	56	0	0	0	0	0	0	0	0	0	0	0	0
501901fe9300ac08640adee9c57ab912	0	0	0	0	0	0	0	0	0	0	0	0	0	0	0	0	0	25	0	14	0	16	0	0	0
2f02c8740254c969513faf8718b1ee47	0	0	0	0	0	0	0	0	0	0	0	0	0	0	0	0	0	23	8	13	0	11	0	0	0
d7ec9525b96c766f8e21866267d70513	0	0	0	0	0	9	0	0	0	0	0	0	0	0	0	0	0	22	0	6	0	18	0	0	0
3190b252675bad676fb7272d62fcf36c	0	0	0	0	0	0	0	0	0	0	0	0	0	0	0	0	0	0	0	0	0	0	0	0	0
5ff7e4248dc54f2b66caa9fbc9c6a666	0	0	0	0	0	0	0	0	0	0	0	0	0	0	0	0	0	0	0	0	0	55	0	0	0
89a17249ca37a51612d2b28511ec33c8	0	0	7	0	0	0	0	0	0	0	0	0	18	20	0	0	0	0	0	0	0	0	0	0	0
68cbddf503caaa8abd3b22a3260674a9	0	10	5	7	0	5	0	0	0	0	0	0	0	0	11	0	8	0	0	0	0	0	0	0	0
ba55ab9b631981680525ae5ea058fb57	0	0	0	0	6	0	0	19	0	6	14	6	0	0	0	0	0	0	0	0	0	0	0	0	0
900b0ae435b783af555800df8648514d	0	14	0	0	0	41	0	0	0	0	0	0	0	0	0	0	0	0	0	0	0	0	0	0	0
679c2254ab4fdf610f8907763d0f957b	0	7	0	0	0	0	10	0	0	0	0	0	0	0	0	0	0	0	0	0	0	0	0	0	0
b6c99b71765ac25f800d206f6e237108	0	0	0	0	0	0	55	0	0	0	0	0	0	0	0	0	0	0	0	0	0	0	0	0	0
258c558c0324a676577139d27dd92edc	0	0	0	0	0	0	3	0	0	0	0	0	0	0	0	0	0	13	16	4	0	18	0	0	0
7cd280ebb1596174f577e35b9195ad6c	0	0	0	0	0	0	0	0	0	0	0	0	0	0	0	0	0	0	40	0	0	14	0	0	0
d1ca2c7faf1b441ca75e5b414dba2c98	0	0	0	0	0	0	0	0	0	0	0	0	0	0	0	0	0	21	12	0	0	12	0	0	0
2064f619e9d74573d10e55167ef86266	0	0	0	0	0	0	0	19	0	0	0	0	0	15	0	0	0	0	0	0	0	0	20	0	0
5ff441539a0a4f8e0bda958576b1889c	0	0	0	0	0	0	0	0	0	0	0	0	0	0	0	0	0	38	7	8	0	0	0	0	0
50d42c09c2adaaffd482e4b7baa25366	0	0	0	0	0	0	0	0	0	0	0	0	0	0	0	0	0	0	0	0	0	33	0	0	0
57893ff3ca5ad08c9618f482eb2d1032	0	0	0	0	0	0	0	0	0	0	0	0	16	0	9	0	0	16	0	0	0	8	4	0	0
5b43bc112ddeb3c95fa0510ce9d93053	0	0	0	0	0	0	0	0	0	0	0	0	0	0	0	0	0	0	53	0	0	0	0	0	0
dbf4894c142f34b36286f7489753e76d	0	0	4	9	0	0	0	0	0	0	0	0	0	10	0	0	0	0	0	0	0	0	0	4	12
e26e8f7a11ac84f6748c2679394c8c86	0	0	0	0	0	0	0	0	0	0	0	0	0	7	0	25	0	0	0	0	0	0	7	14	0
227dfc30f5d961f556b42ec948a418f6	0	0	0	0	0	0	0	0	5	16	9	0	0	0	0	0	0	0	0	0	0	0	0	0	0
f4b8bf96592a6d6226f7dddf5d4e6471	0	0	0	0	0	20	0	18	0	0	0	0	15	0	0	0	0	0	0	0	0	0	0	0	0
d1562e0a893b90f24a951f87ce405aea	0	0	0	0	0	0	0	0	0	0	36	0	0	0	0	0	0	0	0	0	0	0	0	0	0
a02538b4c70abbbb822930351fc7daf1	0	0	0	0	29	0	0	0	0	0	0	0	0	0	0	0	0	0	0	0	0	0	0	0	0
2053f1aac5dd48f65f266ef53797dac5	0	0	0	0	0	0	0	0	0	0	0	0	0	0	0	0	0	0	0	0	52	0	0	0	0
db6449220c13f783a2d982fd9c35a831	0	0	0	0	0	0	0	0	0	0	0	0	0	0	0	0	0	0	0	52	0	0	0	0	0
779784f9e7adf451e160586659b6aa14	0	0	0	0	0	0	0	0	0	0	0	0	0	0	0	0	0	18	11	0	0	13	0	0	0
7d99cf32049366b6a418e5a0a489ded1	0	0	0	0	0	0	0	0	0	0	0	0	0	35	0	0	0	0	15	0	0	0	0	0	0
ff0cf7fa959017db2addcf11e9df95fb	0	0	0	12	0	0	0	0	0	0	0	0	0	0	0	0	0	16	5	0	0	0	0	0	0
dd7ef0290ff9d015f535b90c8cbf496c	0	0	0	0	0	0	0	0	0	0	0	0	16	0	0	25	0	0	11	0	0	0	0	0	0
f1b16ba6907f81245bfeea96fbeee2a2	0	0	0	0	0	0	0	0	0	0	0	0	0	0	0	0	0	0	0	0	0	0	0	0	0
398cb0123c14eec39e6c368b8140d427	0	0	0	0	0	0	0	0	0	0	0	0	0	0	0	0	0	19	0	0	0	32	0	0	0
d896acb8602009c2f0ddcaa704c7fd0b	0	0	0	0	4	0	0	0	0	0	0	0	0	0	0	13	20	0	0	0	0	0	14	0	0
ff01679bd3cce1aa54901ce7cfd5f4f8	0	0	0	0	0	0	0	0	0	0	0	0	0	15	0	0	36	0	0	0	0	0	0	0	0
8acbfb83827cef6d3d34623b2d2dfd45	4	7	0	0	2	4	17	0	0	0	0	0	0	0	0	0	0	0	0	0	0	0	0	0	0
e6a1224a7ccd7b32e63c5af23d91a4c6	0	0	0	0	0	0	0	0	0	0	0	0	0	29	0	0	2	12	0	7	0	0	0	0	0
a432d9c77c3e96598652377edf1b8888	0	0	0	0	0	0	0	0	0	0	0	0	0	0	0	0	0	30	15	0	0	5	0	0	0
181315932a230bbc6558e2b472474968	0	0	0	0	0	0	0	0	0	0	0	0	0	0	0	0	0	0	50	0	0	0	0	0	0
1eaab9af6ec21e297507a3a5236f3a0f	0	0	0	0	0	5	0	0	0	2	3	0	3	10	0	4	8	0	0	0	0	0	0	7	0
73197218ad38bda545b810a641f8877b	0	0	0	0	0	0	0	0	27	0	0	23	0	0	0	0	0	0	0	0	0	0	0	0	0
8344dcaf9c7ea9da84ab5934986be9b9	0	0	0	0	0	50	0	0	0	0	0	0	0	0	0	0	0	0	0	0	0	0	0	0	0
613a4af09356da39a8cda09972d4284c	0	0	0	0	0	0	0	0	0	0	0	0	0	0	0	0	0	0	18	20	0	11	0	0	0
aa80f60e275625f7e604374e45bf848d	0	0	4	0	0	0	0	0	0	0	19	0	0	0	0	0	9	0	5	0	0	0	0	0	3
ad4fe38d9cbdf17b69aea4921ebd3e49	0	0	0	0	0	0	0	0	0	0	0	0	0	0	32	0	10	0	0	0	0	0	0	7	0
383e8b7fd309c5151280776688671200	0	20	0	0	0	0	0	0	0	0	0	0	0	0	0	0	0	0	0	0	0	0	0	0	0
559bcaa8089ce192074b03fb30a2c7d9	0	0	0	0	0	0	0	0	0	0	0	0	0	0	0	0	0	19	11	11	0	7	0	0	0
387015af0d551308404793e4fdc68855	0	0	0	0	0	0	0	0	0	0	0	0	0	0	0	0	0	9	7	13	0	7	0	0	0
0bf1bcd6d857fd507835a7fb90e70727	4	0	0	0	0	0	22	0	0	0	0	0	0	0	0	0	0	0	0	4	0	0	0	0	0
16f01b44459516928400a2946a8f5c43	0	0	0	0	0	0	0	0	0	0	0	0	0	0	0	0	0	0	0	0	0	0	0	0	0
89bb6c090bb114b46432d089347c50b9	0	0	0	0	0	0	0	0	13	0	0	0	0	0	0	0	0	0	0	0	0	0	0	0	0
f58cfb78abcdd47dff0d67d4c6e87ee0	0	0	0	0	0	0	0	0	0	18	0	0	0	0	0	0	0	0	0	0	0	0	30	0	0
f4a38b307f8c2977458ed9565f0840e9	0	0	0	0	15	0	0	0	0	0	0	0	0	0	0	0	0	0	0	0	0	0	0	0	0
32f94fbb1500a344d6fc4b9b3cafd66b	0	0	0	0	0	0	15	0	0	0	0	0	0	14	0	0	0	0	0	18	0	0	0	0	0
37363cca6d2e1c4133ec94544ca7f5f5	0	0	0	0	0	0	0	0	0	0	0	0	0	0	0	0	0	0	16	12	0	19	0	0	0
1c3f9168e2c6228dba13354612b50f11	0	0	0	5	0	0	0	0	0	0	0	0	0	0	0	0	0	10	11	5	0	0	0	0	0
8fd6158e93363ec932f4d9f66ab0e5d6	0	0	0	0	0	0	0	0	0	0	0	0	0	0	0	0	0	11	14	0	0	6	16	0	0
8bc5ba56c32ccf8ce9074f76c8573219	0	0	0	0	0	0	0	0	0	0	0	0	0	0	0	0	0	0	30	0	0	17	0	0	0
a8b227b4c2ab4006796984275563b442	0	0	8	0	11	0	0	0	0	0	0	2	3	0	0	12	0	7	0	0	0	0	0	0	0
970bc66842cccfd5e371658beb4ae6cb	0	0	0	0	0	0	0	0	0	0	0	5	0	27	0	0	15	0	0	0	0	0	0	0	0
dbf3b479e48bc25a693e4d17965b4ab6	0	0	0	0	0	0	0	0	0	0	0	0	0	0	0	0	0	25	0	0	21	0	0	0	0
5692f550e8e66c9f3b28ab6bb71621fd	0	0	0	0	0	0	0	0	0	0	0	0	0	0	0	0	0	15	7	15	0	7	0	0	0
88d50e375d71e7a73ac395b5ac0c7942	0	0	5	0	0	0	0	0	0	0	0	4	8	0	0	17	0	0	0	5	0	0	4	3	0
60d45e225b1b603db0b2518536163585	0	0	0	0	0	0	0	0	0	0	0	0	0	0	27	0	0	0	0	0	0	0	0	0	0
6e24b3e21068af34a6f124cef13d143c	0	0	0	0	0	0	0	0	0	0	0	0	0	0	0	0	0	0	0	0	0	46	0	0	0
219351fc2015b0f7d0e25ca5649a12ca	0	0	0	0	0	0	0	0	0	0	0	0	0	0	0	0	0	0	0	0	0	46	0	0	0
3a82b0be1763d4b78aa674f63a3f40b2	0	0	0	0	0	0	0	0	0	0	0	0	0	0	0	0	0	30	0	0	0	16	0	0	0
1eb267af44ebe82e532d04fc4adff0e6	0	0	0	0	0	0	0	0	0	0	0	0	0	0	11	13	0	9	7	0	0	0	0	0	0
14b3c217a2c811b21e7b968e99a94767	0	0	0	0	0	0	0	0	0	0	0	28	0	0	0	0	0	0	0	0	0	0	18	0	0
b472cd9efb973bf2eb44c7738ed9e181	0	0	0	0	0	0	0	0	0	0	0	0	0	0	0	0	0	0	0	0	0	0	46	0	0
b4b0c2371558acdddd3eae89cb948b97	3	0	0	0	0	0	0	3	0	19	0	0	0	0	0	0	12	0	0	0	0	0	0	0	0
fb9d1f4b19d56116280f4d3ebf8381f1	0	5	0	0	20	4	9	0	0	0	0	0	0	0	0	0	0	0	0	0	0	0	0	0	0
95b71f81133a5f0b46d9658ec5c2c997	0	3	0	2	0	0	0	0	0	0	0	0	4	0	0	2	0	6	0	0	6	8	3	11	0
f597837e32f63a74ab86222ed6cadd62	0	0	0	0	0	0	0	0	0	0	0	0	0	0	0	0	0	14	31	0	0	0	0	0	0
b706afd908448777f561c1ab087cb121	0	0	0	0	0	0	0	0	0	0	0	0	0	0	0	0	0	12	33	0	0	0	0	0	0
3d605a0ef341d745958b7ffc972b4af1	0	0	0	0	0	0	0	0	0	0	0	0	0	0	0	0	0	19	0	0	0	0	0	26	0
5f2b7dce9143bcb1206c81189b6fa9d0	0	0	7	11	7	0	0	0	3	0	0	5	0	0	0	0	0	0	0	0	0	0	0	0	0
0f690294e48a51ad36b772863fb5a9ff	0	0	32	0	0	0	0	0	0	0	0	0	0	13	0	0	0	0	0	0	0	0	0	0	0
f6aa580f638cba602e907c99f09a138d	0	0	0	0	0	0	0	0	19	0	0	10	0	0	0	0	0	0	0	0	0	0	0	0	0
0e09c9ae0c55a7ed6d6b140a1942bc18	0	0	0	0	22	7	0	0	11	0	0	5	0	0	0	0	0	0	0	0	0	0	0	0	0
f048448a19d09e71f54d3a899f435b08	0	0	0	0	8	15	0	0	0	0	0	0	0	0	0	0	0	0	0	0	0	0	0	0	0
dc936fa64af8addc22513b3145988d09	0	0	0	0	0	0	0	0	0	0	0	0	0	0	0	0	45	0	0	0	0	0	0	0	0
2a5ab76b03f1db1bc8317534821a1782	0	0	0	0	0	45	0	0	0	0	0	0	0	0	0	0	0	0	0	0	0	0	0	0	0
a92868999532235682c442869f534095	0	26	0	0	9	0	10	0	0	0	0	0	0	0	0	0	0	0	0	0	0	0	0	0	0
4b797ada3e319e6bdeac14e3d671be82	0	18	0	0	0	0	27	0	0	0	0	0	0	0	0	0	0	0	0	0	0	0	0	0	0
799a40b2ec00542781197166b2e77f88	0	0	0	2	0	0	0	0	0	6	0	0	0	24	0	0	0	0	0	12	0	0	0	0	0
ff8aac2c20b278098843c962ecb20e2f	0	0	0	0	0	0	0	0	0	0	0	0	0	0	0	0	0	18	4	17	0	0	0	0	0
1b6c1b8f258a73330b42925b88755861	0	0	0	0	0	0	0	0	0	0	0	0	0	0	0	0	0	0	0	44	0	0	0	0	0
a9d550240867bda0565d843e37829f52	0	0	0	0	0	0	0	0	3	0	0	12	0	0	0	0	0	11	0	0	0	0	0	0	0
228ea87bfcd4b7bc74753d492d197558	0	0	0	0	0	0	0	0	0	0	0	0	0	0	0	0	0	0	11	0	0	15	0	0	0
73527576532c81c759e0fbb591b1405c	0	0	0	0	0	0	0	0	0	0	0	0	0	0	0	0	0	0	44	0	0	0	0	0	0
d50410d666fa7aaa4cb2b89344e7a2d2	0	0	0	0	13	0	0	0	0	0	14	0	0	0	0	0	0	0	0	0	0	0	0	0	0
5d64b1fa147763cfec745ed1a9229ce9	0	0	0	0	0	0	0	0	0	0	0	0	0	0	0	0	0	0	0	0	0	0	0	0	0
76028108fec0b22e8621ea9b4611005a	0	0	0	0	0	0	0	0	0	0	0	0	0	44	0	0	0	0	0	0	0	0	0	0	0
c4885ad000671ff1da959f95db72f8ea	0	0	0	0	0	0	0	0	0	0	0	0	0	0	0	44	0	0	0	0	0	0	0	0	0
089d44bdc5ac2bd79dbdd83a8b58aecf	0	0	0	0	0	0	0	0	3	0	0	0	0	0	0	0	0	0	7	13	8	12	0	0	0
03282bfa29bac14b49064f95960a802a	0	0	0	0	0	0	0	0	0	0	3	0	0	0	0	0	0	19	8	11	0	2	0	0	0
7ed97455b7b47bda552d0eb664f0d1c8	0	0	0	0	0	0	0	0	0	0	0	0	0	0	0	0	0	22	0	10	0	0	0	0	0
e5ac6db05b74130b3e943c46c22c9a6f	0	0	0	0	0	0	0	0	0	0	0	23	0	0	0	0	0	0	0	0	0	20	0	0	0
e8bade9ffd4171e4f92c5e6b5dad8e00	0	0	0	0	0	0	0	0	0	0	0	0	0	0	0	0	0	33	0	0	0	10	0	0	0
52204d830a7e6cb502ed22d280e70a9d	0	4	0	0	0	3	0	0	3	0	0	5	4	4	0	6	0	4	0	0	0	5	0	0	0
dc999453e94b1433642ad6986dff8a31	0	0	0	0	0	0	0	0	0	0	0	0	0	0	0	0	0	0	0	0	0	9	17	0	10
1920c4a194d9f7a13c84dcbf30743d0b	0	0	0	0	0	0	0	0	0	0	0	0	0	0	0	0	0	0	43	0	0	0	0	0	0
a4b7655a6914339117dbcda88ec42ea6	0	0	0	0	0	0	0	0	0	0	0	0	0	0	0	32	0	0	0	0	0	0	0	0	0
4c8cd2ee87bfa0286d5a83f8652f8ffc	0	0	0	0	6	5	6	0	9	13	0	0	0	0	0	0	0	0	0	0	0	0	0	0	0
ad9aab0b4691844d3f2c86dc83f8ef20	0	0	0	0	8	0	0	0	9	0	0	26	0	0	0	0	0	0	0	0	0	0	0	0	0
e2ab2dd2183568fc88457d53bed358de	0	0	0	0	0	0	28	0	0	0	0	0	0	0	0	0	0	0	0	0	0	0	0	0	0
458f1b7844219fd9e1abf2553e8a5ebe	0	0	0	0	0	0	0	0	0	0	0	0	0	0	0	0	0	0	0	0	0	0	0	0	0
cbc27ea1139de1e8f21e4f57812d7a32	0	0	0	0	0	0	0	0	0	0	0	0	0	0	0	0	0	0	0	0	0	0	0	42	0
02c8528ac6b571beeffb9e54760a5aed	0	7	0	0	0	0	3	0	0	7	0	0	0	0	0	8	5	0	0	0	2	0	9	0	0
72199be76d4aa605048e5c6284f2e6e4	0	0	0	0	7	0	0	0	0	0	0	11	0	0	0	0	0	0	11	0	5	0	0	7	0
caca9dc9d1ba822937df9fd70b8ff588	0	0	0	0	0	0	0	0	0	0	0	0	0	0	0	0	0	0	0	41	0	0	0	0	0
9b6ab91c308c3e4965f4ae3d00c815da	0	0	0	0	0	0	0	0	0	0	0	0	0	0	0	0	0	0	0	15	0	0	0	4	0
5e8823a4d09d06e9a6856ac5f33b2356	0	0	0	0	0	0	0	0	0	0	0	0	0	0	0	0	0	16	0	8	0	17	0	0	0
cd7833522e537c621c86ab41bcc61d61	0	0	0	0	0	0	0	0	0	0	0	0	0	0	0	0	0	19	0	6	0	0	0	0	0
d5dcf8928cb4a45693dddf6276389436	0	6	0	0	0	0	5	0	0	0	0	0	0	0	0	0	0	9	14	0	0	0	0	0	0
b652715bc62d007b0e770382e4ba87f3	0	0	0	0	0	0	0	0	0	0	0	0	0	0	0	0	0	0	9	0	0	32	0	0	0
1f50d0af59e886726c721e6303cc6bf6	0	0	0	0	0	0	0	0	0	0	0	0	0	0	0	0	0	11	10	0	0	20	0	0	0
791ad1ee9bc062054f841e94510513c4	0	0	0	0	0	0	0	0	0	0	0	0	0	0	0	0	0	10	26	0	0	5	0	0	0
f1498b861b7ce27c751778dc0221a3e4	0	0	0	0	19	0	0	0	0	0	0	0	0	0	0	0	0	11	0	0	0	11	0	0	0
5b5ad29c19134c5e31d765001b1969cc	0	0	0	0	0	4	0	0	0	0	0	0	7	5	0	22	0	0	0	0	0	0	0	0	3
64d5805b1bcff003a692e5ac7d60669d	0	0	0	0	0	0	0	0	14	8	0	8	0	5	0	0	0	0	0	0	0	0	0	3	0
535338fb2e137a4f2cb9c163a9d65908	0	0	0	0	0	0	0	0	14	0	0	0	0	0	0	0	0	0	0	0	0	0	0	0	0
9c9afc26b20e353dd082ab211668d075	0	0	0	0	0	0	0	0	0	0	0	0	23	0	0	0	0	0	0	0	0	0	0	0	0
e6b47806ae62ecad20a37d4d0b066bac	0	0	0	0	0	0	0	0	0	0	8	6	0	0	0	0	0	0	0	0	9	0	17	0	0
43e4d794aa1bd2faa32acd13eef663ba	0	0	0	0	0	0	0	0	0	0	0	0	0	0	0	0	0	0	16	24	0	0	0	0	0
2f7b935f347144ce7ac3bf2f2172621d	0	0	0	0	0	0	0	0	0	0	0	0	0	0	0	0	0	0	0	23	0	0	0	0	0
c9383085d0c95d497cfa10d591f764ee	0	0	0	0	0	0	0	0	0	0	0	0	0	0	0	0	0	0	0	30	0	0	0	0	0
428ff238df489711cb7a6547d9292327	0	0	0	0	0	0	0	0	0	0	0	0	0	0	0	0	0	8	9	0	0	11	0	0	0
e4e8386dcd0d9f9ea7340c973c0deda8	0	11	0	0	0	0	0	0	0	10	0	0	0	0	0	7	0	0	0	0	0	3	9	0	0
4308d51163179c10e61c67837e9a53f8	0	0	0	0	0	0	0	0	0	0	0	0	0	0	0	0	0	10	30	0	0	0	0	0	0
745d32c61239e4bde7121757c73e8082	0	3	0	0	7	0	5	0	0	0	0	0	0	0	6	0	5	0	0	0	0	0	14	0	0
c1990b7fb23f62c892b7bc3f58767ea0	0	0	0	0	0	0	0	10	0	0	30	0	0	0	0	0	0	0	0	0	0	0	0	0	0
a767d9a60fdb59c96e559722b68f3797	0	0	0	0	10	6	0	0	0	0	0	0	20	0	0	0	0	0	0	0	0	0	0	0	0
af0ea061132d1c18d9e4c1e2c732cdcd	0	0	0	0	0	0	0	0	0	0	0	0	0	0	0	0	0	0	0	0	0	0	0	0	0
cf1aab30b283864b821770132f69a5dc	0	0	0	0	0	0	0	0	0	0	0	0	0	0	0	0	0	0	0	39	0	0	0	0	0
d7463dce1ab4db9cf8f134047723bc85	0	0	0	0	0	0	0	0	0	0	0	0	0	0	0	0	0	0	0	0	0	24	15	0	0
396d679f0b84631aa3026a312d63364c	0	0	0	0	0	0	0	0	0	0	0	0	0	0	0	0	0	17	0	0	0	22	0	0	0
ecf2a9c32e4fb56c29f90395dfc12d37	0	0	0	0	0	0	0	0	0	0	0	0	0	0	0	0	0	0	39	0	0	0	0	0	0
df9158babc8fcee2d5796eff432c66e7	0	0	0	0	0	0	0	0	0	0	0	0	25	0	0	0	0	0	14	0	0	0	0	0	0
6f602a19d82c8cd75af44fd809e32065	0	0	0	0	0	0	0	0	0	0	0	0	0	0	0	0	0	0	39	0	0	0	0	0	0
df19de4892c70d2e96f53468edd88612	0	0	0	0	0	0	0	0	0	0	0	0	0	0	0	0	0	39	0	0	0	0	0	0	0
9e14585d6a00edf2915dc7450cc192bf	0	0	0	0	0	0	0	0	0	6	0	0	0	13	0	5	0	10	0	0	0	0	0	0	0
089b60fa736f5ce8355d816ea8f340dc	0	9	7	0	0	0	7	0	0	0	0	0	0	0	0	0	0	0	0	0	0	0	0	0	0
4f9adf41584cf5f51750ec8f30a352eb	0	0	0	0	0	0	0	0	0	17	0	0	0	0	0	12	0	0	0	0	0	0	10	0	0
5b81ecbfebb992c25b76e202a35b55df	0	0	0	0	0	0	0	0	17	0	22	0	0	0	0	0	0	0	0	0	0	0	0	0	0
5168d02c42ed1104d72239ca22b6570d	0	12	0	0	4	4	0	0	0	0	0	0	9	0	0	8	0	0	0	0	0	0	0	0	0
36edb4f20d4d86d23e5c141daef009c5	0	0	0	0	0	0	0	0	0	0	0	0	9	30	0	0	0	0	0	0	0	0	0	0	0
93025d225a03cf45fd2966e2d7926b90	0	0	0	0	0	0	0	0	0	0	0	0	39	0	0	0	0	0	0	0	0	0	0	0	0
592c2dca74e235a9f2a81271ded415e9	0	0	0	0	14	15	0	0	0	0	0	0	0	0	0	0	0	0	0	0	0	0	0	0	0
d3ba757891fe4d988af3c913c537321c	0	17	0	0	22	0	0	0	0	0	0	0	0	0	0	0	0	0	0	0	0	0	0	0	0
12963a1a334ec004cf0216f0b21df377	20	0	0	0	19	0	0	0	0	0	0	0	0	0	0	0	0	0	0	0	0	0	0	0	0
0ae0730724d95dbe5b5f331a1df5b7c2	0	0	0	0	39	0	0	0	0	0	0	0	0	0	0	0	0	0	0	0	0	0	0	0	0
62dbb175af4d56423b3e1a654ee40a19	0	0	0	0	0	0	11	0	0	0	0	0	0	18	0	0	0	0	0	9	0	0	0	0	0
f2663cf2b5beba8d53e702833d22f6d1	0	0	0	0	4	0	0	0	0	0	0	0	13	0	0	0	0	9	0	12	0	0	0	0	0
d0590c5ff3517b3a4189b3bf575c2d97	0	0	0	0	0	0	0	0	0	0	0	0	0	0	0	0	0	0	0	4	0	18	0	0	0
34bd6ea451346af9a50fda2f6f1123a3	0	8	0	0	0	0	0	0	0	0	0	0	0	0	0	3	8	4	5	0	0	0	0	0	0
4800bbb48575c3774f39ae3c8afe8f86	0	0	0	0	0	0	0	0	0	0	0	0	0	0	0	0	0	26	0	0	0	12	0	0	0
a2860598f7a7433e10226aaa211f2707	0	0	0	0	0	0	0	0	0	0	0	0	0	0	0	0	0	0	29	0	0	9	0	0	0
1e092e9cad3d8c2a1df9b6089fb35461	0	0	0	0	0	0	0	0	0	0	0	0	0	0	0	0	0	0	0	0	0	11	0	0	11
90c57fed04d924a06eb54d7fe45e1172	0	0	0	0	0	0	0	0	0	0	0	0	0	0	0	0	0	38	0	0	0	0	0	0	0
b98e4792cbbe73444cc32343d730c3b2	0	0	0	0	0	0	0	0	0	0	0	0	0	0	0	0	0	38	0	0	0	0	0	0	0
2facf363c2a366d8411124c2eb9e4e21	0	0	0	5	0	0	0	0	0	0	0	0	0	3	0	0	2	0	0	0	0	0	21	0	4
5facc5c4b93b35d999e02a0ea37bcbc9	0	0	0	0	0	0	0	0	0	0	0	0	0	0	38	0	0	0	0	0	0	0	0	0	0
2125fd3171b55ac724df58af18ad4a00	0	0	0	0	0	0	0	0	0	0	0	0	0	0	0	0	0	0	0	0	0	0	0	0	0
fabef71acd7f03fcc5eea039885a927c	0	0	0	0	11	27	0	0	0	0	0	0	0	0	0	0	0	0	0	0	0	0	0	0	0
25dc0dc0d3608e235caf7baf50e416ec	0	5	0	0	5	12	6	0	0	0	0	0	0	0	0	0	0	0	0	0	0	0	0	0	0
7e46b509a9998151c8f1016a71a25cd9	0	20	0	0	18	0	0	0	0	0	0	0	0	0	0	0	0	0	0	0	0	0	0	0	0
6307aba690a578190ec28541a07c0ff8	0	0	0	0	0	0	32	0	0	0	0	0	0	0	0	0	0	0	0	0	0	0	0	0	0
e17e349bba8621f704661fe626d0db5e	0	38	0	0	0	0	0	0	0	0	0	0	0	0	0	0	0	0	0	0	0	0	0	0	0
df723e26a271184a0e01a485685d0b1c	0	5	4	0	9	0	0	0	0	0	0	0	0	0	0	4	0	7	0	8	0	0	0	0	0
3fba533ee890612b5352825284824885	0	0	0	0	4	0	0	0	0	10	2	0	0	0	0	0	0	0	5	0	0	0	0	3	0
724051434deb0781cb63ddc724c33b13	0	0	0	3	5	0	0	0	0	0	0	0	0	5	0	0	0	0	8	0	0	16	0	0	0
957789048d96b8d653e2ad3efd2578bb	0	0	0	0	0	0	0	0	0	0	0	0	0	0	0	0	0	0	37	0	0	0	0	0	0
6fa01422358007ab453526e68dee2b6d	0	0	0	0	0	0	0	0	0	0	0	0	0	0	0	0	0	0	0	0	0	0	0	37	0
db512cf079cb304a17ebb97d4ea4809c	0	0	0	0	0	0	0	0	37	0	0	0	0	0	0	0	0	0	0	0	0	0	0	0	0
f670f5805a17e70d3e01f83a70439153	0	0	0	0	0	0	0	7	0	7	0	0	6	7	4	6	0	0	0	0	0	0	0	0	0
5813e6561644bd1d241eea221a836475	0	0	0	0	0	0	0	0	0	0	0	0	0	8	9	11	9	0	0	0	0	0	0	0	0
a9f98aed0f5f687491dcc692eb7ce6ce	0	0	0	0	0	0	0	0	0	0	0	0	0	0	0	37	0	0	0	0	0	0	0	0	0
35f2a596be6f1da2cdd4c25803ea963d	0	37	0	0	0	0	0	0	0	0	0	0	0	0	0	0	0	0	0	0	0	0	0	0	0
c440c71c3be6d8a2fbfd074226ebcb13	0	7	0	0	0	0	0	0	0	0	0	0	0	0	0	8	0	0	5	10	0	0	0	2	4
5785f932127c2c43f13d69243c2b9d23	0	0	0	0	0	0	0	0	0	0	0	0	0	0	0	0	0	0	0	0	0	20	0	0	0
615ed9c2c03b8b411d733a8bafcc89e9	0	0	0	0	0	0	0	0	0	0	0	0	0	0	0	0	0	0	0	0	0	36	0	0	0
7a05c1f7f4f30676af4d58b0d8c6d46a	0	0	0	0	0	0	0	0	0	0	0	0	0	0	0	0	0	12	0	0	0	24	0	0	0
99b5f4c87ad37ebb689244200139fad8	0	0	0	0	0	0	0	0	0	0	0	0	0	0	0	0	25	0	11	0	0	0	0	0	0
3f96e5e7906d6188db16ae5d786fd223	0	0	0	0	0	0	0	0	0	0	0	0	0	0	0	0	0	0	0	0	0	0	0	36	0
f69076b135c9c0f44886823a3a6600ba	0	0	0	0	0	0	0	0	10	12	0	0	0	14	0	0	0	0	0	0	0	0	0	0	0
d6de092293052f771e2c72dac23771cd	0	5	0	0	0	8	12	0	0	0	0	0	0	0	0	0	0	0	0	0	0	0	0	0	0
e100d69d37e8bd73b3cd6fb283b1db54	0	0	0	0	36	0	0	0	0	0	0	0	0	0	0	0	0	0	0	0	0	0	0	0	0
f883453770a9709a03f78e80c6f7a2fb	0	0	0	0	0	0	36	0	0	0	0	0	0	0	0	0	0	0	0	0	0	0	0	0	0
dec9ff733849ea6380afc80b5258ade1	0	6	0	0	0	0	16	0	0	0	0	0	0	0	0	0	0	0	0	0	0	0	0	0	0
405c5e55c62592fc0528fc274456efdf	0	0	0	0	0	0	0	0	0	0	0	0	0	0	0	0	0	0	0	0	0	0	0	0	0
90317e60b4bc96b2fc5e12a9ea180407	0	0	0	0	0	0	0	0	0	0	0	0	0	0	0	0	0	12	0	15	0	8	0	0	0
f5f39e65d929be1bc6e98dd4720cc2e4	0	0	0	0	0	0	0	0	0	0	0	0	0	0	0	0	0	0	0	9	0	12	0	0	0
5cdad9e63e04d351c7acc6576afc43d5	0	0	0	0	0	2	0	0	0	3	7	0	0	0	0	6	0	0	0	0	0	0	0	0	0
4634f240657a557b6f6b85a23c83053b	0	0	0	0	0	0	0	0	0	0	0	0	0	0	0	0	0	0	0	0	0	0	0	0	0
b205307072f62eb58bfe352e7c76b7de	0	0	2	0	0	0	0	4	0	4	10	0	0	0	0	0	0	0	0	0	0	5	0	0	0
2f8d5ec569cf3762a059ab2a13b95ee6	0	0	0	0	0	0	0	0	0	0	0	0	0	4	4	17	0	0	0	0	0	0	5	0	2
627a0af08debe21de3964f5be4a2b8c8	0	0	0	0	0	22	0	0	0	0	0	0	0	0	0	0	0	0	0	0	0	0	0	0	0
06ba47e27b7f29489165c0efca389b66	0	35	0	0	0	0	0	0	0	0	0	0	0	0	0	0	0	0	0	0	0	0	0	0	0
0b54e212a80a71e6b5ba436375d173d4	0	0	0	5	0	0	0	0	0	0	0	0	0	13	0	0	0	0	0	16	0	0	0	0	0
e3e618b6c0b173feb5ba627d9a96d485	0	0	0	0	0	0	0	0	0	0	0	0	0	0	0	0	0	0	0	34	0	0	0	0	0
cc6926158d6cafc9344c0764f89de668	0	0	0	0	4	0	0	0	7	9	2	0	0	0	4	0	0	0	0	0	0	0	0	0	0
d8b5552590346e3b5578e6a58bc6370f	0	0	0	0	0	0	0	0	0	0	0	0	0	0	0	0	0	0	12	0	0	22	0	0	0
99883ffc0c01be5766d31a71aee1cfa4	0	0	0	0	0	0	0	0	0	0	2	0	0	0	0	0	0	3	0	0	0	0	8	14	0
b1a977c2482ba7817a257a56e1f32feb	0	0	0	0	0	0	0	0	0	0	0	0	25	0	0	0	0	0	0	0	0	0	0	0	6
d8af4700b89bd21a2bd3dab73c403253	0	0	0	0	0	0	0	0	18	0	0	0	0	0	0	0	0	0	0	0	0	0	0	0	16
e0e872e12b06f4d30897c6b4e606191f	0	0	0	0	0	0	0	0	0	0	0	34	0	0	0	0	0	0	0	0	0	0	0	0	0
ef05077d6098e2ffcf60f2513df1d86c	0	0	0	0	0	0	0	0	0	0	0	0	0	34	0	0	0	0	0	0	0	0	0	0	0
d93238151b5662d5d7ff259cd65b84a6	0	0	0	0	29	0	0	0	0	0	0	0	0	0	0	0	0	0	0	0	0	0	0	0	0
5da92b3df99df2449c5d2d475aedfeee	0	0	0	0	0	6	0	0	0	0	0	0	0	0	0	0	0	18	0	9	0	0	0	0	0
4f16a4a975e4f7c331dd2ef6f4d58ef0	0	2	0	0	2	0	0	0	6	0	0	4	0	0	0	0	0	0	0	7	0	0	0	0	0
a7f349b8cecb3e481600210d0aae4af8	0	0	0	0	0	0	0	0	0	0	0	0	0	0	6	0	17	0	0	0	0	0	0	0	0
4342c55713c42457c1b1739bee43b1dc	0	2	0	0	0	0	0	0	0	0	7	0	6	0	0	0	0	0	0	0	0	0	8	3	0
f95e23754435a2c710a5d431192b6eae	0	0	0	0	0	0	0	0	0	0	0	0	0	0	0	0	0	0	0	0	0	33	0	0	0
79ba32e977d92148847f4a86dbd79f67	0	0	0	0	0	0	0	0	0	0	0	0	0	0	0	0	0	20	0	0	0	13	0	0	0
cec31782a0618bd49ca08d85c49bde08	0	0	0	0	0	0	0	0	0	0	0	0	0	0	0	0	0	6	27	0	0	0	0	0	0
51fd5fbc6cdf8db3f863ff5a412f2dda	0	0	0	0	0	0	0	0	0	0	0	0	0	0	0	0	0	0	33	0	0	0	0	0	0
7d15cd5f463f3f922c2f2353f890dd77	0	0	0	0	0	0	0	0	0	0	0	0	0	0	0	0	0	0	33	0	0	0	0	0	0
77f376e5919909d9175a62bc0a8bde72	0	0	0	7	0	0	0	0	0	0	0	0	5	0	0	0	0	0	0	0	0	0	5	0	3
2cd15ecf1e013d72d1b72bde770f63a4	0	6	13	0	8	0	0	0	0	0	0	0	0	0	0	0	0	0	0	0	0	0	0	6	0
8e287b10cb4aed8603c55ff80b572a16	0	0	0	10	6	0	0	0	0	0	17	0	0	0	0	0	0	0	0	0	0	0	0	0	0
ca88ca4e05ffe3d7572e4af1a708f21f	0	7	0	0	0	0	0	0	0	10	0	3	0	0	0	8	0	0	0	0	0	0	5	0	0
953ebebca0d97820edc54adf780f1940	0	0	0	0	0	0	0	0	17	0	0	0	0	0	0	0	0	0	0	0	0	0	0	0	0
022d4522af8c095e234b0cb9a26b82c0	0	0	0	0	0	0	0	11	0	0	0	0	0	0	0	0	0	0	0	0	0	0	0	0	0
2cd0d376c1c94d112f9248890b83310b	0	0	0	0	0	0	0	0	0	0	33	0	0	0	0	0	0	0	0	0	0	0	0	0	0
80f49655b9c1bfede7b335f6f1ba4a9a	0	0	0	0	17	0	0	0	0	0	0	0	0	0	0	0	0	0	0	0	0	0	0	0	0
85e4081375dc18f8ff3b379163a3105d	8	15	0	0	0	0	0	0	0	0	0	0	0	0	0	0	0	0	0	0	0	0	0	0	0
9b4f80930129be6f4bfc949da56416a4	0	0	0	0	0	0	0	0	0	0	0	0	0	0	0	0	0	0	0	0	14	18	0	0	0
dd41700dcdc3e2f8d9370543d95a5c27	0	0	0	0	0	0	0	0	0	0	0	0	0	0	0	0	0	0	18	5	0	0	0	0	0
7bcc9a1bd0314561644ce8e9549371e0	0	0	0	0	0	0	0	0	0	0	0	0	0	0	0	0	0	0	0	0	0	0	0	0	0
d3770008434c77cc586fd143347621a2	0	0	0	0	0	0	0	0	0	0	0	0	0	0	0	0	0	8	14	0	0	10	0	0	0
62e8ef34911f34dbf32c7daad95d7ff1	0	0	0	0	0	0	0	0	0	0	0	0	0	0	0	0	0	17	0	0	0	15	0	0	0
768068d0790fe1e7314defebba2028dd	0	0	0	0	0	0	0	0	0	0	0	0	0	0	0	0	0	7	0	0	0	0	16	0	9
7db39962ec588c019d6f30f5945efa7e	0	0	0	23	0	0	0	0	0	0	0	0	0	0	0	0	0	0	0	0	0	0	0	9	0
c132d94403506f798a384d8e75988991	0	0	0	0	0	0	0	0	32	0	0	0	0	0	0	0	0	0	0	0	0	0	0	0	0
c21c59be8894c0ec65f1f82531faade2	0	0	0	0	0	0	0	0	0	0	18	0	0	0	0	0	0	0	0	0	0	0	0	0	0
b6e09946c6bfa7ad4f1606066cdf9c4f	0	14	0	0	13	0	5	0	0	0	0	0	0	0	0	0	0	0	0	0	0	0	0	0	0
ffd2852fed1bd52883cb74c91ecd9a0b	0	32	0	0	0	0	0	0	0	0	0	0	0	0	0	0	0	0	0	0	0	0	0	0	0
5b9c9f5b150d3e8506f1d8af4056c91d	0	0	0	0	0	0	0	0	0	0	0	0	0	0	0	0	0	0	0	9	0	0	0	0	0
26ee924f6da09245f2e80ed823129d9f	0	0	0	0	0	0	0	0	0	0	0	0	0	0	0	0	0	0	0	0	0	0	0	0	0
250daf6c791429c5a83658212043ef67	0	0	0	0	0	0	0	0	0	0	0	0	0	0	0	0	0	0	0	0	0	9	6	8	8
106ec72d34d9ccf652cd664a222a06b9	0	0	0	0	0	0	0	0	0	0	0	0	0	0	0	0	0	0	0	0	0	31	0	0	0
d6418f14f8bc1444e1a82ca72908ab87	0	0	0	0	0	0	0	0	0	0	0	0	0	0	0	0	0	0	8	0	0	23	0	0	0
12089e862404595da40162295ec0ef68	0	0	0	0	0	0	0	0	0	0	0	0	0	0	0	0	0	0	0	0	0	0	0	0	3
33cc8667f86ec4fd8870710503fec02e	0	3	3	0	0	0	0	0	0	0	4	0	0	4	0	0	0	0	0	0	0	0	0	9	0
986b3cf0dda386b6f3a91ffb25cbc570	0	0	0	0	0	0	0	0	0	4	7	0	0	0	0	0	5	0	0	0	0	0	15	0	0
768756be1beacadca735625140f7892f	0	0	0	0	0	0	0	0	0	0	0	0	0	0	0	0	31	0	0	0	0	0	0	0	0
7055a222327923cfbdf73ee5cd146780	0	0	0	0	0	0	0	0	0	0	0	0	6	0	0	25	0	0	0	0	0	0	0	0	0
63882c9f92a944aa3947cef16a685eab	0	0	0	0	31	0	0	0	0	0	0	0	0	0	0	0	0	0	0	0	0	0	0	0	0
b882c8f92806a5cceae079731fbdf3df	0	0	0	0	0	0	0	0	0	0	0	0	0	0	0	0	0	0	0	0	5	8	0	7	0
8a43e9ac3cd40e58fde64eade236a845	0	0	0	0	0	0	0	0	0	0	0	0	0	0	0	0	0	0	0	0	30	0	0	0	0
63f869178ceaaa9468944e75da9f9fb3	0	0	0	0	0	0	0	0	0	2	0	0	0	0	0	0	5	0	0	15	0	0	0	0	0
ce749b99b0ba976cdb387cade1659a1b	0	0	0	0	0	0	0	0	0	0	0	0	0	0	0	0	0	0	0	30	0	0	0	0	0
06eaa4041f60f02599e16f16d98926ad	0	0	0	0	0	0	0	0	0	0	0	0	0	0	0	0	0	0	11	0	0	8	0	0	0
f9d0e870cb84c4efa509ea0200e7c784	0	0	0	0	0	0	0	0	0	0	0	0	0	0	0	0	0	0	0	0	0	21	0	0	0
f977f8aa988f4aa5bd8af1afee1c34e1	0	0	0	0	0	0	0	0	0	0	0	0	3	0	0	0	0	0	2	0	0	3	6	5	3
c9c95a4ae520d5fd1c6cdb28d5b182c4	0	0	0	0	0	0	0	0	0	0	17	0	0	0	0	0	0	7	0	0	0	0	0	0	0
3dc4ca31265ec48edabf3e11322419de	0	0	0	0	0	0	0	0	0	0	0	0	0	0	0	0	0	30	0	0	0	0	0	0	0
82a792262b0bcaa7d012970ea5b7f677	0	0	0	0	0	0	0	0	0	0	0	0	0	0	0	0	0	17	0	0	0	0	0	0	0
b3a7d4f5a4626db605caba9aae290449	0	0	0	0	0	0	0	0	0	0	0	0	0	0	0	0	0	0	0	0	0	0	30	0	0
9834fe14cf882f4e817bd2956d69c81d	0	0	0	0	0	0	0	0	0	0	0	0	0	0	0	0	0	0	0	0	0	0	0	11	0
adaa52a9a5e5a17a607cd0f9716ba58d	0	0	0	0	0	0	0	0	0	30	0	0	0	0	0	0	0	0	0	0	0	0	0	0	0
48a11dad23f6da388e29864cd70f1a3d	0	0	0	0	0	0	0	0	0	15	0	0	0	0	0	15	0	0	0	0	0	0	0	0	0
6f79b46d9f20e28008f3e247ca40896d	0	0	0	0	0	0	0	0	0	0	30	0	0	0	0	0	0	0	0	0	0	0	0	0	0
d873fad3e734d19de1ddab90abcfe9b3	0	0	0	0	0	0	0	0	0	0	0	0	0	0	0	0	0	0	0	0	0	0	0	0	0
0e6f7bfc60d161c60807de37b4ae1ef1	0	0	0	0	0	0	0	0	0	0	0	0	0	0	30	0	0	0	0	0	0	0	0	0	0
a99d1c185fdf7c182663a7426f645ed4	5	0	0	0	3	17	0	0	0	0	0	0	0	0	0	0	0	0	0	0	0	0	0	0	0
0de23f48bb4d77db342c621ef7432da4	0	0	0	0	0	30	0	0	0	0	0	0	0	0	0	0	0	0	0	0	0	0	0	0	0
1707e3dc90b1a36788b76dbe45f4fbe9	0	0	0	0	30	0	0	0	0	0	0	0	0	0	0	0	0	0	0	0	0	0	0	0	0
2e118c6f1f4e9dca950184e36176c1a1	0	15	0	0	15	0	0	0	0	0	0	0	0	0	0	0	0	0	0	0	0	0	0	0	0
7aab3c5d1ea13316d8ece25f0522b8da	6	10	0	0	0	0	0	0	0	0	0	0	0	0	0	0	0	0	0	0	0	0	0	0	0
392ca13427416fa1ad92d20fd76900cb	0	30	0	0	0	0	0	0	0	0	0	0	0	0	0	0	0	0	0	0	0	0	0	0	0
d7bb1ac5656606763df63c740e9a66f9	0	0	0	0	0	0	0	0	6	0	0	5	0	0	0	0	0	0	0	0	11	0	0	0	0
93920768d08827c28921063e8758b7a2	0	0	0	0	0	0	0	0	0	0	0	0	0	0	0	0	0	6	0	0	23	0	0	0	0
c8cc2df0afe569a69ba47dbcf22c9deb	0	0	0	0	2	0	0	0	0	0	0	7	0	0	0	0	0	0	10	10	0	0	0	0	0
b0f47949d20e83ac619f5f5c80d818ef	0	0	0	0	0	0	0	0	0	0	0	0	0	0	0	0	0	0	0	4	0	0	4	0	14
f37b58aed1c822085998d35a9eb73623	0	0	0	0	0	0	0	0	0	0	0	0	0	0	0	0	0	0	0	29	0	0	0	0	0
ca329a167dcccebd0d2e1cf9ad4ba28e	0	0	0	0	0	0	0	0	0	0	0	0	0	0	0	0	0	5	15	0	0	9	0	0	0
badd303bc9dfea6efb893a984bd6c7f2	0	0	0	0	0	0	0	0	0	0	0	0	0	0	0	0	0	14	0	0	0	15	0	0	0
2e4ba7581b915bd288865516ad14318b	0	0	0	0	0	0	0	0	0	0	0	0	0	0	0	0	0	20	0	0	0	9	0	0	0
7b4e3e3ede55fc5ea0478585c7f6e68d	0	0	0	0	0	0	0	0	0	0	0	0	0	0	0	0	0	0	0	0	0	7	10	5	0
70c36bc0b62465cc8f60cbd63ab47c64	0	0	0	0	0	0	0	0	0	0	0	0	0	0	0	0	0	0	0	0	0	9	0	0	0
428847502228d3a5e9c212770a57596f	0	0	0	0	0	0	0	0	0	0	0	0	0	0	0	0	0	11	0	0	0	18	0	0	0
2ba17d8f657a99d7b5b06e3ff52d0cd2	0	0	0	0	0	0	0	0	0	0	0	0	0	0	0	0	0	0	29	0	0	0	0	0	0
1bc77b99639f862fef5484b871513f32	0	0	0	0	0	0	0	0	0	0	0	0	0	0	0	0	0	29	0	0	0	0	0	0	0
ebf3660eeffaa42790dc0be2d260c593	0	0	0	11	0	7	0	0	0	0	0	0	0	9	0	0	0	0	0	0	0	0	0	0	0
3d47518a32f3dc21af0212a87226f087	0	0	0	0	0	0	0	9	0	0	0	0	0	20	0	0	0	0	0	0	0	0	0	0	0
a352bd5b00591a010ed6444fe692d399	0	0	0	0	0	0	0	0	0	14	0	0	0	0	0	0	0	0	0	0	0	0	0	0	0
e6340b4b29fe5b418044f0ef1201e3d6	0	5	0	0	0	0	0	0	0	6	0	0	9	0	0	9	0	0	0	0	0	0	0	0	0
247dff9d0996cf18bdfae353eed5ece2	0	3	0	0	22	4	0	0	0	0	0	0	0	0	0	0	0	0	0	0	0	0	0	0	0
5b82f11e2b5136df9dc6dad9f8944f04	0	0	0	0	14	0	15	0	0	0	0	0	0	0	0	0	0	0	0	0	0	0	0	0	0
67040ded83e9478c25ae569f22e4442b	0	0	0	0	0	0	0	0	0	0	0	0	0	0	0	0	0	0	0	0	0	0	0	0	0
c8d0dbc4a0160988841b3c88746fcd9f	0	0	0	0	0	0	0	0	0	0	0	0	0	0	0	0	0	0	22	0	0	6	0	0	0
d49633c3ceee6fafed766fbb5bfeb7c8	0	0	0	0	0	0	0	0	0	0	0	0	0	0	0	0	0	7	21	0	0	0	0	0	0
affa69502a7e398f5e0c945aec6faf42	0	0	0	0	0	0	0	0	0	0	0	0	0	0	0	0	0	0	0	0	0	0	0	0	0
a06c411420b0e6213b2109e8d8aa8fe8	0	0	0	0	0	0	0	0	8	6	0	6	0	0	0	0	0	0	0	0	0	0	0	0	0
a06b7120ab07edcbb36fc9be3944ef14	0	0	0	0	3	0	0	0	9	0	0	8	0	0	0	0	0	0	0	0	0	0	0	0	0
916a13142dbfa50fef95595f2bcb49ca	0	0	0	0	0	0	0	0	6	3	10	9	0	0	0	0	0	0	0	0	0	0	0	0	0
0bc2749b126b93625d09c692057a5b6d	9	0	0	0	0	0	7	5	0	0	7	0	0	0	0	0	0	0	0	0	0	0	0	0	0
1c7b8fe2d7d47c2096f099859578a709	0	0	0	0	0	0	0	28	0	0	0	0	0	0	0	0	0	0	0	0	0	0	0	0	0
8453dc4c233114ea20fb5456bff30b53	0	0	0	0	0	0	0	0	0	0	0	28	0	0	0	0	0	0	0	0	0	0	0	0	0
4071fa17348e745d05b6a39ece5888b4	0	0	0	0	0	0	0	0	0	0	0	0	0	0	0	0	28	0	0	0	0	0	0	0	0
e2329488bda12e0f50a4b91e8e4abf78	0	0	0	0	0	28	0	0	0	0	0	0	0	0	0	0	0	0	0	0	0	0	0	0	0
fe9f1b0031f9346f9be77b803ec3f7a5	0	0	0	0	0	28	0	0	0	0	0	0	0	0	0	0	0	0	0	0	0	0	0	0	0
c3f187c85cb2fe77171c85866077eddb	0	0	0	0	28	0	0	0	0	0	0	0	0	0	0	0	0	0	0	0	0	0	0	0	0
54919470674bfb1822ceccc06e485b25	0	0	0	0	28	0	0	0	0	0	0	0	0	0	0	0	0	0	0	0	0	0	0	0	0
5892d2111f5ccf6956d0e578dd2d09ba	17	11	0	0	0	0	0	0	0	0	0	0	0	0	0	0	0	0	0	0	0	0	0	0	0
3f6c29efdd82dd9eaa818c4a89729eb8	0	0	0	0	0	0	0	0	0	0	0	0	0	0	0	19	0	0	0	5	0	0	0	0	0
45618c2d9528d608d6dd24f7852c161a	0	0	0	0	0	0	0	0	0	0	0	0	0	0	0	0	0	0	0	0	0	19	0	0	0
add7328c27288fcb2ec9954f0fe73722	0	0	0	0	0	0	0	0	0	0	0	0	0	0	0	0	0	0	0	0	0	27	0	0	0
602c1d9a6ddf43e0181c30658f8c7d12	0	0	0	0	0	0	0	0	0	0	0	0	0	0	0	0	0	18	0	0	0	9	0	0	0
81aae1a397760d63c03ccc3b95c20c6a	0	0	0	0	0	0	0	0	0	0	0	0	0	0	0	0	0	22	0	0	0	5	0	0	0
c7c4ccc2f6b718c880101741c0c5e620	0	0	0	0	0	0	0	0	0	0	0	0	0	0	0	0	0	0	27	0	0	0	0	0	0
22f2faaf07850463d606a27bbd0334b5	0	0	0	0	0	0	0	0	0	0	0	0	0	0	0	0	0	0	27	0	0	0	0	0	0
79786653ba9c223e5c54a6910ef54310	0	0	3	5	0	0	0	0	0	0	0	0	0	0	0	0	0	0	0	0	0	0	6	0	2
71726293e7c352a22a076f7ae6980862	0	0	0	7	0	0	0	0	0	0	0	0	0	0	20	0	0	0	0	0	0	0	0	0	0
672dc6a78ba9787ff2daaf830530f3a3	0	0	0	0	0	0	0	0	13	0	0	0	0	0	0	0	0	0	0	0	0	0	0	0	0
e50d0f6bee290a45158a56036907e384	0	0	0	0	0	0	0	0	0	9	6	12	0	0	0	0	0	0	0	0	0	0	0	0	0
d9606a31b3de30834caefd3d12841c8c	0	0	0	0	0	0	0	0	0	13	0	0	0	0	0	0	0	0	0	0	0	0	0	0	0
3907a024b12481fa5c9360fe02e30838	0	0	0	0	0	0	0	0	0	27	0	0	0	0	0	0	0	0	0	0	0	0	0	0	0
3dd24eaaba17e3cf91ed27a9f92bcfb9	0	0	0	0	0	0	0	0	0	0	0	27	0	0	0	0	0	0	0	0	0	0	0	0	0
d584d5185d9a65568e47de2c10799315	0	0	0	0	0	0	0	0	0	0	0	0	0	0	0	0	0	0	0	0	0	0	0	0	0
d9d29f84050268a2e6360e3eed6acd71	0	0	0	0	10	6	0	0	0	0	0	0	5	3	0	0	3	0	0	0	0	0	0	0	0
8685694c70bbc6bafa2c7b8039733c18	0	5	0	0	3	6	0	0	0	0	0	0	0	0	0	0	0	0	0	0	0	0	0	0	0
090591e37c65620b97f0cb81ed60240e	0	0	0	0	0	27	0	0	0	0	0	0	0	0	0	0	0	0	0	0	0	0	0	0	0
4ba122bf8a1f45c49c43d22bfc3ab957	0	0	0	0	6	0	0	0	0	0	0	0	0	0	0	0	0	0	0	0	0	0	0	0	0
16199bfa53dd2aff493832e676b677a4	0	0	0	0	27	0	0	0	0	0	0	0	0	0	0	0	0	0	0	0	0	0	0	0	0
6e579ca820f39d351fcf79dd7d2a29e3	0	0	0	0	0	0	27	0	0	0	0	0	0	0	0	0	0	0	0	0	0	0	0	0	0
f1400c7d1c4363e56672a965b0b4e2ed	0	0	0	0	0	0	0	0	0	0	0	0	0	0	0	0	0	0	10	7	9	0	0	0	0
05a1ac81d0c6ce4df6d09b21b7faa7f1	0	0	6	0	0	0	0	0	0	0	0	0	0	0	0	0	0	7	0	5	0	0	0	0	0
a6d8070cd36ac5bb1cfa43cda8df2b72	0	0	0	0	0	0	0	0	7	0	0	0	0	0	0	0	0	0	0	11	0	0	0	0	0
41d6a0521df94727e97e7516200e9264	0	0	0	0	0	0	0	0	0	0	0	0	0	11	0	11	0	0	0	4	0	0	0	0	0
5a7cf6a13aaf68f99fc9ceac3b721185	0	0	0	0	0	0	0	0	0	0	0	0	0	0	0	0	0	14	4	8	0	0	0	0	0
65dfc71b908d1797f6e5fc0580d3a5ca	0	5	0	0	6	0	0	3	0	0	0	0	0	0	0	0	0	9	0	0	0	0	0	0	0
08411ee17709547641698bde56cc5932	0	0	0	0	0	0	0	0	0	14	0	0	0	0	0	0	0	9	0	0	0	3	0	0	0
55030995e797ac438044f8471c31a676	0	0	0	0	0	0	0	0	0	0	0	0	0	0	0	0	0	17	0	0	0	9	0	0	0
d7ad9a4fbb4b25ecf7f5bcc3e5a0cea0	0	0	0	0	0	0	0	0	0	0	0	0	0	0	0	0	5	0	7	0	0	5	0	0	9
25769ccc3ccb1ef746dabc16464a40fa	0	0	0	0	0	0	0	0	0	0	0	0	0	0	0	0	0	26	0	0	0	0	0	0	0
8daa6c899befbb93e4ef62924e0df448	0	0	0	0	0	0	0	0	0	0	0	0	0	0	0	0	0	0	0	0	0	0	0	10	0
4d09778075c80bdf862fc8eb4bb9dc6a	0	0	0	0	0	4	0	0	0	0	13	0	5	0	0	0	0	0	0	0	0	0	0	0	0
e4af4bb39f94e1a3218f3045c5548633	0	0	0	0	0	0	0	0	0	0	8	0	0	4	0	0	0	0	0	0	0	0	8	0	0
ac282a5495d85e033410fb7f83831287	0	0	0	0	0	7	0	0	0	0	0	0	8	0	0	0	0	0	0	0	0	0	0	0	5
0e42dfe4b5b445543503d5087d680053	0	0	0	0	0	0	0	0	8	0	0	15	0	0	0	0	0	0	0	0	0	0	0	0	0
ec8733e4a1cc105f395a840160c61e88	0	0	0	0	0	0	0	0	7	0	8	0	0	7	0	0	0	0	0	0	0	0	0	0	0
390ea6461748f6f24931fc12312961e5	0	0	0	0	0	12	0	0	5	0	0	0	0	0	0	0	0	0	0	0	0	0	0	0	0
f7afa0a83624a9b565aacc2580184d23	0	0	0	0	0	0	0	0	11	0	0	15	0	0	0	0	0	0	0	0	0	0	0	0	0
f0869055ef4e04df949ec6958becd554	0	0	0	0	0	0	0	0	0	13	0	13	0	0	0	0	0	0	0	0	0	0	0	0	0
a570a50c777e4bf9ff6878fcb73e2bf9	0	0	0	0	0	26	0	0	0	0	0	0	0	0	0	0	0	0	0	0	0	0	0	0	0
acdc7343e39ba82da80e1cc86d06b2c1	0	0	0	0	26	0	0	0	0	0	0	0	0	0	0	0	0	0	0	0	0	0	0	0	0
6a93f2ead322c0242eec6c70c2026edd	0	0	0	0	26	0	0	0	0	0	0	0	0	0	0	0	0	0	0	0	0	0	0	0	0
2dce5a8ce87c5ce1be58c67323f66ca9	0	0	0	0	26	0	0	0	0	0	0	0	0	0	0	0	0	0	0	0	0	0	0	0	0
81be57333b819b5224ec97c84def6a89	0	0	0	0	26	0	0	0	0	0	0	0	0	0	0	0	0	0	0	0	0	0	0	0	0
07b7f8e8ac8314c03d694ffc8646281a	11	0	0	0	0	0	0	0	0	0	0	0	0	0	0	0	0	0	0	0	0	0	0	0	0
e458d64252f259eabd1d782a2fa70601	0	0	0	0	0	0	0	0	0	0	0	0	0	0	0	0	0	0	0	0	0	0	0	0	0
8c388664a369f989e586349dd5e4f3f2	0	0	0	0	0	0	0	0	0	0	0	0	0	0	0	0	0	0	0	0	7	18	0	0	0
0705d13078b7b17046d5119a4a6e6bed	0	0	0	0	0	0	0	0	0	0	0	0	0	0	0	0	0	0	0	25	0	0	0	0	0
bc222d8a473002687e767cd872e335ee	0	0	0	0	0	0	0	0	0	0	0	0	0	0	0	0	0	0	0	25	0	0	0	0	0
e9e201d45decfb4fb9316d3b92700d57	0	0	0	0	0	0	0	0	0	0	0	0	0	0	0	0	0	0	0	0	0	19	0	0	0
e7db5434ce895ea8a2d364e2e7417b02	0	0	0	0	0	0	0	0	0	0	0	0	0	0	0	0	0	0	0	0	0	0	0	0	0
1a40063a5e251dccc8384fa65d349f19	0	0	0	0	0	0	0	0	0	0	0	0	0	0	0	0	0	0	0	0	0	0	0	0	0
2a908107494c5bb728247192cdd3fa16	0	0	0	0	0	0	0	0	8	0	0	0	0	0	0	0	0	0	0	0	0	5	0	0	0
d7e319b96ffe22ed3c3de4fbb6cbb843	0	0	0	0	4	0	6	0	0	0	6	0	0	5	0	0	0	0	0	0	0	4	0	0	0
d87336bcf2b7244555e572ade2ae6f62	0	0	0	0	0	0	0	0	0	0	0	0	0	18	0	0	0	0	7	0	0	0	0	0	0
0ca29882a538942808fa1aa7342ca375	0	0	0	0	0	0	0	0	0	0	0	0	0	0	0	0	0	0	0	0	0	0	0	0	0
1691b3f04c27f83d5cddc5bb9f74e6ed	0	0	0	0	0	0	0	0	18	0	0	0	0	0	0	0	0	0	0	0	0	0	0	0	0
6bb186c414b83a0f3ba2b54e0d49a940	0	0	0	0	0	0	0	0	25	0	0	0	0	0	0	0	0	0	0	0	0	0	0	0	0
fa429ef474494a488bca0e76ea82784f	3	0	0	0	8	0	0	5	0	0	9	0	0	0	0	0	0	0	0	0	0	0	0	0	0
33cdda98ef9a2569edf79392de3d03c5	0	0	0	0	0	0	0	0	0	9	0	0	16	0	0	0	0	0	0	0	0	0	0	0	0
b88ae9d790e6001f794e7c8de716c607	0	0	0	0	0	0	0	0	0	0	0	0	0	25	0	0	0	0	0	0	0	0	0	0	0
d713c0448a5298222e00afccb6b3186f	0	0	0	0	0	0	0	0	0	0	0	0	0	0	0	25	0	0	0	0	0	0	0	0	0
4b6f0043de2c210d326ee04261ba4c1a	0	0	0	0	9	11	0	0	0	0	0	0	0	0	0	0	0	0	0	0	0	0	0	0	0
14501bfec3ad05c66f84b159accc4cbf	0	0	0	0	11	14	0	0	0	0	0	0	0	0	0	0	0	0	0	0	0	0	0	0	0
c74d24f1c2c901447487934b6e98a59a	0	0	0	0	0	0	0	0	0	0	0	0	0	0	0	0	0	0	0	24	0	0	0	0	0
82969e80eee58d4e0bda3de351e1dcbe	0	0	0	0	0	0	0	0	0	0	0	0	0	0	0	0	0	0	0	0	0	17	0	0	0
29bfdbf2fbf501c479baa21eaab5a127	0	0	0	0	0	0	0	0	0	0	0	0	0	0	0	0	0	0	0	0	0	19	0	0	0
1ab35fc36284a74388b659c1551c05f4	0	0	0	0	0	0	0	0	0	0	0	0	0	0	0	0	0	8	0	0	0	16	0	0	0
550d879a43e4caea4c8463398d98e83a	0	0	0	0	0	0	0	0	0	0	0	0	0	0	0	0	0	0	16	0	0	8	0	0	0
570202918ab9e966e5c821d8eb015936	0	0	0	0	0	0	0	0	0	0	0	0	0	0	0	0	0	0	10	0	0	14	0	0	0
738e9c1f8e832501947bec8900ec1db1	0	0	0	0	0	0	0	0	0	0	0	0	0	0	0	0	0	0	24	0	0	0	0	0	0
8e4e712a4551f0273f025e560f7576f3	0	0	0	0	0	0	0	0	0	0	0	0	0	0	0	0	0	0	24	0	0	0	0	0	0
7f395eecc184e4885030ab1bcf7b57c3	0	0	0	0	0	0	0	0	0	0	0	0	0	0	0	0	0	0	24	0	0	0	0	0	0
3bd6b8d0b5a7e12ca39e20a56bc2f22d	0	0	0	0	0	0	0	0	0	0	0	0	0	0	0	0	0	24	0	0	0	0	0	0	0
0072b0040e39e5d64afc5038682721dc	0	0	0	0	0	0	0	0	0	0	0	0	0	0	0	0	0	7	0	0	0	0	0	5	7
476a13fd5196c0b1046ee8d2688117c1	0	0	0	0	0	0	0	0	6	0	5	0	0	0	0	0	0	13	0	0	0	0	0	0	0
692ef3111a5143c64d5ec9d26603cc5a	0	2	5	0	0	0	0	0	0	0	0	0	2	4	0	0	0	0	0	0	0	0	0	0	3
caf8c81ae051e1cc3d49663ab9fc4b1e	0	4	0	0	4	4	0	0	4	0	6	0	0	0	0	0	0	0	0	0	0	0	0	0	0
a497ee302c32e324ccc7b899059440c9	0	0	0	0	0	11	0	0	0	0	0	6	7	0	0	0	0	0	0	0	0	0	0	0	0
370822c1e4d34375c4624e24d5cb1088	0	0	0	0	0	0	0	0	0	0	0	0	24	0	0	0	0	0	0	0	0	0	0	0	0
ddc64422daf6ec752885fc1ca733b8df	0	0	0	0	0	0	0	0	0	0	0	0	17	7	0	0	0	0	0	0	0	0	0	0	0
bfbecdc54b590ce5282ae71af2cdba6e	0	0	0	0	0	0	0	0	0	0	0	0	0	15	0	9	0	0	0	0	0	0	0	0	0
3fb9b63effe74fde07759ed8369bc71f	0	0	0	0	0	0	0	0	0	0	0	0	0	0	24	0	0	0	0	0	0	0	0	0	0
87b11763f199ee3f3b64de30225edab7	0	0	0	0	0	24	0	0	0	0	0	0	0	0	0	0	0	0	0	0	0	0	0	0	0
0614d70ff40dce9f139ac4dfb120d454	0	0	0	0	24	0	0	0	0	0	0	0	0	0	0	0	0	0	0	0	0	0	0	0	0
59f97cc2f003eceaa0a729dac4c58091	0	0	0	0	24	0	0	0	0	0	0	0	0	0	0	0	0	0	0	0	0	0	0	0	0
8ce27108f692169f682860697cd145c0	0	0	0	0	0	0	24	0	0	0	0	0	0	0	0	0	0	0	0	0	0	0	0	0	0
cbcd2e8906965303fdfac1eb54b879ad	0	0	0	0	0	0	0	0	0	0	0	0	0	0	0	0	0	0	0	0	0	0	0	0	0
47d7f95761f3119444ed7605706c7a9a	0	0	0	0	0	0	0	0	0	0	0	0	0	0	0	0	0	0	0	0	0	0	0	0	0
a08f13d97b498e50d02be531984754fd	0	0	0	0	0	0	0	0	6	0	0	0	0	0	0	0	0	0	0	0	13	0	0	0	0
68a390b0af1af35b480dec5c510f6f0e	0	0	0	0	0	0	0	0	0	0	0	0	0	0	0	0	0	0	0	9	0	0	0	0	6
ef5ef70925b1484c63cb5b086908a39c	0	0	0	0	0	0	6	0	3	0	0	0	0	8	0	2	0	0	0	4	0	0	0	0	0
d9bb1a4f6f582e36bf068d7339e15c5a	0	0	0	0	0	0	0	0	0	0	0	0	0	0	0	0	0	0	0	5	0	10	0	0	0
928768d6ea2ea09ab9a1473579df0b58	0	0	0	0	0	0	0	0	0	0	0	0	0	0	0	0	0	0	0	0	0	0	0	0	0
539bda9189d7afb59b67eda4e1096f06	0	0	0	0	0	0	0	0	0	0	0	0	0	0	0	0	0	0	8	0	0	0	0	0	0
bf1a08d3c50c290f038d68546e93cd34	0	0	0	0	0	0	0	0	0	0	0	0	0	0	0	0	0	0	0	0	0	0	0	0	0
a618a3e77e399905bfa8d5d73cf9bc5e	0	0	0	0	5	0	0	0	0	0	0	0	0	0	0	0	5	0	0	0	0	0	0	6	0
3d03f07a2d8291671dec822e932be208	0	0	0	0	0	0	0	0	0	0	0	0	0	0	0	0	0	0	0	0	0	13	0	0	0
ccdc6fe1720d77731a424085344ede4f	0	0	0	0	0	0	0	0	0	0	6	0	0	0	0	0	0	5	7	0	0	5	0	0	0
9cb9fffe640d359cf5055dc1074c284e	0	0	0	0	0	0	0	0	0	0	0	0	0	0	0	0	0	12	0	0	0	11	0	0	0
9696da03723374855c09a03044495689	0	0	0	0	0	0	0	0	0	0	0	0	0	0	0	0	0	7	0	0	0	16	0	0	0
2807b5d6c64771713b435b2a146017c8	0	0	0	0	0	0	0	0	0	0	0	0	0	0	0	0	0	14	9	0	0	0	0	0	0
850d891fcd414ef8783a01e313670810	0	0	0	0	0	0	0	0	0	0	0	0	0	0	0	0	0	0	23	0	0	0	0	0	0
d7c0491378e29fbb0fc65ad32e28bed4	0	0	0	0	0	0	0	0	0	0	0	0	0	0	0	0	0	23	0	0	0	0	0	0	0
bfcda1792d0c5d06000508cca6932dc8	0	0	3	0	0	0	0	0	0	0	16	0	0	0	0	0	0	0	0	0	0	0	0	0	0
86b39501d2a210fe30aa20dd69e3e4cb	0	0	0	0	7	0	0	0	0	0	0	11	0	0	0	0	0	0	0	0	0	0	0	5	0
053f0d2c7c6d3dd41b0f9853c1e23891	0	0	0	0	0	6	0	0	17	0	0	0	0	0	0	0	0	0	0	0	0	0	0	0	0
7719a9221fc316c2c361f4f8f6736496	0	0	0	0	0	0	0	4	0	0	11	0	0	0	0	0	0	0	0	0	0	0	0	0	0
4adac39ac1282a1290828d72603be8bb	0	0	0	0	0	0	0	0	0	8	0	15	0	0	0	0	0	0	0	0	0	0	0	0	0
cb3a6fa4b7432cfc6415275a94c7d998	0	0	0	0	0	0	0	0	0	23	0	0	0	0	0	0	0	0	0	0	0	0	0	0	0
d8816ffe34c4882cc2deea71939b6b83	0	0	0	0	0	0	0	0	0	0	0	23	0	0	0	0	0	0	0	0	0	0	0	0	0
8a1644ff42afb8732827805d65954baa	0	0	0	0	7	6	0	0	0	0	0	0	0	0	0	0	0	0	0	0	0	0	0	0	0
82a4205e12bda5bd7844233f0bcf1500	0	0	0	0	0	0	0	0	0	0	0	0	11	3	0	0	0	0	0	0	0	0	0	0	0
0474ecd069b478d729ca1db74121fdab	0	0	0	0	23	0	0	0	0	0	0	0	0	0	0	0	0	0	0	0	0	0	0	0	0
3fdb4e9c6403dbc0b7b14785c568056d	0	7	0	0	0	0	0	0	0	0	0	0	0	0	0	0	0	0	0	0	0	0	0	0	0
513c59e3b8425d1f81606b95821c0f1b	0	0	0	0	0	0	0	0	0	0	0	0	0	0	0	0	0	0	0	0	0	0	0	0	0
908686f767f0d0470bc95c1054f38d7e	0	0	6	0	0	0	0	0	0	0	0	0	0	0	0	0	0	0	10	6	0	0	0	0	0
f69b9dcfd5d32f66272d0ab9c8e19c7d	0	0	0	0	0	0	0	0	0	0	0	0	0	0	0	0	0	0	0	22	0	0	0	0	0
793cc7765bfce8185630af2b6bd8a032	0	0	0	0	0	0	0	0	0	0	0	0	0	0	0	0	0	0	0	7	0	15	0	0	0
1a4b25e70a07251198d57db5f4de3b3f	0	0	0	0	0	0	0	0	0	0	0	0	0	0	0	0	0	0	0	0	0	13	0	0	0
c4aa9ec8aa8f6f499049780c5f0013ae	0	0	0	0	0	0	0	0	0	0	0	0	0	0	0	0	0	0	0	0	0	0	0	0	0
044774f4646db7101208a2362ed9c603	0	0	0	0	0	0	0	0	0	0	0	0	0	0	0	0	0	3	0	0	0	10	0	0	0
03b8ceb1cd5109a6e98d5d9d1e2f69ef	0	0	0	0	0	0	0	0	0	0	0	0	0	0	0	0	0	0	0	0	0	0	0	0	15
06669372cc0e903a0379b1ea66217b95	0	0	0	0	0	0	0	0	0	0	0	0	0	0	0	0	0	13	0	0	0	9	0	0	0
e48ebb0f0119fe854a7d6049ccf53286	0	0	0	0	0	0	0	0	0	0	0	0	0	0	0	0	0	5	8	0	0	9	0	0	0
c61edeafb7e344c742d923f80d1bb02a	0	0	0	0	0	0	0	0	0	0	0	0	0	0	0	0	0	0	0	0	0	22	0	0	0
1ea3f15ef0a3c41ef8e01ae693ad2511	0	0	0	0	0	6	0	0	0	0	0	0	0	0	0	0	0	0	4	0	0	5	0	0	0
0a4c80a45fd313c1b136b711878a3f4b	0	0	0	0	0	0	0	0	0	0	7	0	0	0	0	0	0	0	0	0	0	15	0	0	0
5318bef51d2090f935dab90ba982aef1	0	0	0	0	0	0	0	0	0	0	0	0	0	0	0	0	0	0	22	0	0	0	0	0	0
38884c2d6f3b7f4d01cc034a5fa5f5da	0	0	0	0	0	0	0	0	0	0	0	0	0	0	0	0	0	0	0	0	0	0	0	0	0
27421dd9ec966841fcb6080809f1b21c	0	0	0	4	0	0	0	0	0	0	0	0	5	0	0	7	0	0	0	0	0	0	0	0	0
0a68a29d11f73b2687414c526377b939	0	0	0	0	0	0	0	0	0	0	0	0	0	0	0	0	0	0	0	0	0	0	22	0	0
3835ad0b693c0a6264b7be24013fd1fa	0	0	0	0	0	0	0	0	0	0	0	0	0	0	0	0	0	0	0	0	0	0	0	22	0
73853a674adde380a88157e6b4a01948	0	0	0	0	2	0	0	0	0	0	0	0	0	0	0	0	0	0	0	0	0	0	0	11	0
4f3d2ba0be7e925e5bb19794bd21a2bd	0	0	0	0	0	0	0	0	0	15	0	0	0	0	0	0	0	0	0	0	0	0	0	0	0
b098d175ad64c7ec4e9d20459c758a01	0	0	0	0	0	0	0	0	0	22	0	0	0	0	0	0	0	0	0	0	0	0	0	0	0
b35c9101ba5297c8fe3e530b94d3c4ba	0	0	0	0	0	0	0	0	0	0	8	0	0	0	0	0	0	0	0	0	0	0	0	0	0
1d9a338eed88b7f82643c24e5aac0e10	0	0	0	0	0	22	0	0	0	0	0	0	0	0	0	0	0	0	0	0	0	0	0	0	0
eda82474fe5da65ad5b3a0d5afd5e814	0	0	0	0	0	22	0	0	0	0	0	0	0	0	0	0	0	0	0	0	0	0	0	0	0
44d4415672ce1a611b0ad9ed44047fa2	0	0	0	0	0	22	0	0	0	0	0	0	0	0	0	0	0	0	0	0	0	0	0	0	0
3bede553b413f4c83e3d36f112ce7218	0	0	0	0	0	0	0	0	0	0	0	0	0	0	0	0	0	0	0	0	0	0	0	0	0
0c44743f9295a81f7fdafae7fb5233e7	0	0	0	0	0	0	0	0	0	0	0	0	0	0	0	0	0	10	0	6	0	5	0	0	0
4cc8389ec23a75fb284cc9509411374e	0	0	0	0	0	0	0	0	0	0	0	0	0	0	0	0	0	0	0	0	0	0	0	0	0
2f6089c95740e605ce6fe90cd7a5a5db	0	0	0	0	0	4	0	0	0	0	0	0	5	0	0	0	0	0	0	0	0	0	0	0	0
fd9c01121a46295737ab015c4eb0a923	0	0	0	0	0	0	0	0	0	0	0	0	7	0	0	0	0	0	0	0	0	5	0	0	0
1008ead05e6487219de505cb2af3a5d2	0	0	0	0	0	0	0	0	0	0	0	0	0	0	0	0	0	0	21	0	0	0	0	0	0
6b3d8e75f9f23cf375e27b4335955efe	0	0	0	3	0	0	2	0	0	2	0	0	8	2	0	0	0	2	0	0	0	0	0	0	0
bc626cd7d54a567a687a9c324f08fa44	0	0	0	0	0	0	0	0	0	0	0	0	0	0	0	0	0	21	0	0	0	0	0	0	0
e31de84603147ea6ffbf67b6e213e89d	0	0	0	14	0	0	0	0	0	0	0	0	0	0	0	0	0	0	0	0	0	0	4	0	3
e3b283f4d4700af85f542a64222d614d	0	0	0	0	0	0	0	0	0	0	3	5	0	0	5	0	0	0	0	0	0	0	0	3	5
bdb3316fbc88b6da6630f923f8fdf25d	0	0	0	0	0	0	0	0	0	0	0	0	0	0	0	0	0	0	0	0	0	0	0	0	21
6c25d852028a3c7c443918856e3c1d30	0	0	0	0	0	0	0	2	2	0	0	12	0	0	0	0	0	0	0	0	0	0	0	0	0
2e49d47985cf1f2aa0c747725de72d86	0	0	0	0	0	0	0	0	0	8	8	0	0	0	0	0	0	0	0	0	0	0	0	0	0
4f636e153e0568e1a8b6a9fca94deda2	0	0	0	0	0	0	0	0	0	4	17	0	0	0	0	0	0	0	0	0	0	0	0	0	0
851a80258934e49aac349c38531a86fc	0	0	0	0	0	0	0	0	0	0	7	0	0	0	0	0	0	0	0	0	0	0	0	0	0
c5d96b79bc318c72ea91a8f9659abcf0	0	0	0	0	0	5	0	0	0	0	0	0	0	10	0	6	0	0	0	0	0	0	0	0	0
27aa8190e16771f94b172cb91c6397c4	0	0	0	0	0	0	0	0	0	0	0	0	0	0	0	0	0	0	0	0	0	0	0	0	0
4edf08678027d1fa0b6c1d177caf562c	0	0	0	0	0	0	0	0	0	0	0	0	0	0	0	0	0	0	0	0	20	0	0	0	0
dd45d960b026a4c39bc4a0b18b3dc13c	0	0	0	0	0	0	0	0	0	0	0	0	0	0	0	0	0	0	2	0	11	7	0	0	0
b14b08f3e9fa149d5aa29e03a0d7bff9	0	0	0	0	0	0	0	0	0	0	0	0	0	0	0	0	0	0	0	0	20	0	0	0	0
af79e06919eddba4155b3225bc369400	0	0	0	0	0	0	0	0	0	0	0	0	0	0	0	0	0	0	0	20	0	0	0	0	0
f2f1dc9f9c5e04d72fa396e13c77f53a	0	0	0	0	0	0	0	0	0	0	0	0	0	12	0	0	0	0	0	8	0	0	0	0	0
0ed1b9eb667062d547ea8d5ccc79f03e	0	0	0	0	0	0	0	0	0	0	0	0	0	0	0	0	0	0	0	20	0	0	0	0	0
8df00d37be4e96b60d07bef9e7183b41	0	0	0	0	0	0	0	0	0	0	0	0	0	0	0	0	0	10	0	6	0	4	0	0	0
a193807e428530a6566308336493f623	0	0	0	0	0	0	0	0	0	0	0	0	0	0	0	0	0	0	0	11	0	9	0	0	0
798c1bcad313d660f1aa26c97fca4452	0	0	0	0	0	0	0	0	0	0	0	0	0	0	0	0	0	0	0	0	0	9	0	0	0
362613301e67a9e3681194d22ef4bccb	0	0	0	0	0	0	0	0	0	0	0	0	0	0	0	0	0	0	0	0	0	6	0	0	0
94a0fcd7d4f6f510bb31bc97e6b30070	0	0	0	0	0	0	0	0	0	0	0	0	0	0	0	0	0	0	0	0	0	0	0	0	0
fae175b2fcf8303947c4c6260ad57d4c	0	0	0	0	0	0	0	0	6	0	0	0	0	0	0	0	0	0	0	0	0	6	0	0	4
f1f7da585daffb7335b2ba8fa85962a4	0	0	0	0	0	0	0	0	0	0	0	0	0	0	0	0	0	0	0	0	0	20	0	0	0
fad36ba9fa8d25c4115f5027fa0e8c4e	0	0	0	0	0	0	0	0	0	0	0	0	0	0	0	0	0	0	0	0	0	20	0	0	0
b89f6af807fd05d6ee3bd5c620e42b92	0	0	0	0	0	0	0	0	0	0	0	0	0	0	0	0	0	0	20	0	0	0	0	0	0
bdb59d6f1e9bc85c8f961bd81b4fa58a	0	0	0	0	0	0	0	0	0	0	0	0	0	0	0	0	0	20	0	0	0	0	0	0	0
507ba6dc22293459047c19f7f6a0b2d0	0	0	0	0	0	0	0	0	0	0	0	0	0	0	0	0	0	0	0	0	0	0	0	0	0
a4545c39751b974812c4ffc78da8d797	0	0	0	0	0	0	0	0	3	0	2	0	0	2	0	0	0	0	0	0	0	0	0	3	7
1995aeaa9e130188ecd0f024eddfcd9e	0	0	20	0	0	0	0	0	0	0	0	0	0	0	0	0	0	0	0	0	0	0	0	0	0
7b629a383c4ee7a1bd552447b8046a93	0	0	5	0	15	0	0	0	0	0	0	0	0	0	0	0	0	0	0	0	0	0	0	0	0
0877ffe9eecd45355cbc37c7756cfcf8	0	8	0	6	0	2	0	0	0	0	0	0	0	0	0	0	0	0	0	0	0	0	0	0	0
bf7864696210feee62d387e11afff8c5	0	0	0	0	0	0	0	0	0	0	0	0	3	6	0	5	0	0	0	0	0	0	6	0	0
ed91a73a8babc429975d844781b548fa	0	0	0	0	0	0	0	0	0	0	0	0	0	0	0	0	0	0	0	0	0	0	20	0	0
d9b2d67e68392b5fe09f7dc87a817d9b	0	0	0	0	0	0	0	0	0	0	0	0	0	0	0	0	0	0	0	0	0	0	0	0	20
fa6b9b461d1f012234717b5a3e8ed1db	0	0	0	0	0	0	0	0	0	0	2	0	16	0	0	0	0	0	0	0	0	0	0	2	0
816636304a83b2779ec1197ef7e108e8	0	0	0	0	0	0	0	4	3	0	0	0	0	4	2	0	0	0	0	0	0	0	0	0	0
ead5382295fa4877039bc1c21bea23f7	0	0	0	0	0	0	0	0	20	0	0	0	0	0	0	0	0	0	0	0	0	0	0	0	0
719ce2e74f55690288e92f7c16a8f2e9	0	0	0	0	0	0	0	0	0	14	0	0	6	0	0	0	0	0	0	0	0	0	0	0	0
efe300ab521e41ca4e2982e45c0e323c	0	0	0	0	0	0	0	0	0	0	20	0	0	0	0	0	0	0	0	0	0	0	0	0	0
7fc80718cda8196351aaab1b966ce97e	0	0	0	0	0	0	0	0	0	0	0	20	0	0	0	0	0	0	0	0	0	0	0	0	0
8473b46fcaf029b6120e853a51000915	0	0	0	0	0	0	0	0	0	0	0	0	20	0	0	0	0	0	0	0	0	0	0	0	0
6076b85c5edb67c0329f90a9272b6c44	0	0	0	0	13	0	0	0	0	0	0	0	0	0	7	0	0	0	0	0	0	0	0	0	0
fda7719e788d66e34dc1d516b1037537	0	4	0	0	0	16	0	0	0	0	0	0	0	0	0	0	0	0	0	0	0	0	0	0	0
9db1046ad64ef8ddccb41509078d1ed5	0	0	0	0	0	20	0	0	0	0	0	0	0	0	0	0	0	0	0	0	0	0	0	0	0
ad551d32f72555260e5a43ee803be86e	0	0	0	0	20	0	0	0	0	0	0	0	0	0	0	0	0	0	0	0	0	0	0	0	0
040ade1b0a9dd806fd58d9d80240efd4	0	0	0	0	0	0	20	0	0	0	0	0	0	0	0	0	0	0	0	0	0	0	0	0	0
f4e61e3a05b099afa6fd598f34d3f00f	0	20	0	0	0	0	0	0	0	0	0	0	0	0	0	0	0	0	0	0	0	0	0	0	0
a1c8fc37d3a00ea9ed6d4b1ce8cf379b	0	0	0	0	0	0	0	0	0	0	0	0	0	0	0	0	0	0	6	5	0	0	8	0	0
64c911ae18e8e4969449ab7a0fb5a5ea	0	0	0	0	0	0	0	0	0	0	0	0	0	0	0	0	0	0	0	19	0	0	0	0	0
9c5eab6debfe59e6d02647e4bbd3defc	0	0	0	0	0	0	0	0	0	0	0	0	0	0	0	0	0	0	0	0	0	0	0	0	0
907b7838f8f85ea51c7453da0a70fef6	0	0	0	0	0	0	0	0	0	0	0	0	0	0	0	0	0	0	0	0	0	10	0	0	0
50c1ebc9adb785a947aa9f1b93966b8d	0	0	0	0	0	0	0	0	0	0	0	0	0	0	0	0	0	0	0	0	0	0	0	0	0
805a23adf4f7b2b02dae21a27b366d4a	0	0	0	0	0	0	0	0	0	0	0	0	0	0	0	0	0	11	0	0	0	0	0	0	0
fa3166f5db3488e36f40e2b3a4a39146	0	0	0	0	0	0	0	0	0	0	0	0	0	0	0	0	0	0	0	0	0	0	0	0	0
46f5aad096c7857d562f8009d62ef64c	0	0	0	0	0	0	0	0	0	0	0	0	0	0	0	0	0	0	0	0	0	19	0	0	0
ac9b3278c3d666e14039762f78ad957c	0	0	0	0	0	0	0	0	0	0	0	0	0	0	0	0	0	0	0	0	0	19	0	0	0
97446c6809a1e982b64a2443ab0851e3	0	0	0	0	0	0	0	0	0	0	0	0	0	0	0	0	0	0	0	0	0	19	0	0	0
ce4b2d6b4c35cecd88e4a81f1e7a902f	0	0	0	0	0	0	0	0	0	0	0	0	0	0	0	0	0	8	11	0	0	0	0	0	0
d943ce10caa3254a29adf5f5ae3cd382	0	5	0	0	8	0	0	0	0	0	0	0	0	0	0	0	0	0	6	0	0	0	0	0	0
18532580eee3f7390120846b733c016b	0	0	0	0	0	0	0	0	0	0	0	0	0	0	0	0	0	19	0	0	0	0	0	0	0
6879cd897fb7ba5adac55cbdbf222236	0	4	0	0	0	0	0	0	4	0	0	0	0	0	0	0	0	3	0	0	0	0	0	0	0
c81ef0f05f730f814d69dbd9b1bf49ba	0	0	0	0	0	0	0	0	0	0	0	0	8	0	0	0	0	11	0	0	0	0	0	0	0
fde28c07ddad9a71ae362b3a2ea5e7d6	0	0	0	0	0	0	0	0	0	0	0	0	0	0	0	0	0	19	0	0	0	0	0	0	0
14c55aec81f210db027f522bf0be57de	0	0	0	0	0	7	0	0	0	0	0	0	0	0	0	0	0	12	0	0	0	0	0	0	0
38843c20b9e4460d361669444e721c8f	0	0	0	0	0	0	0	0	0	0	0	0	0	0	0	0	0	0	0	0	0	0	0	0	19
0342833416bb56e0d5b2588c65e9e58b	0	0	0	0	0	4	0	0	0	15	0	0	0	0	0	0	0	0	0	0	0	0	0	0	0
739f3421d237fecdce9596dcacd9bb65	0	0	0	0	0	0	0	0	0	0	0	19	0	0	0	0	0	0	0	0	0	0	0	0	0
609ca2b175a78393839094aeb814ccfa	0	0	0	0	0	0	0	0	0	0	0	0	14	0	0	0	5	0	0	0	0	0	0	0	0
5ef63246b0fd024447f7d721767d65a4	0	0	0	0	0	0	0	0	0	0	0	0	19	0	0	0	0	0	0	0	0	0	0	0	0
4d313f0e4226bc565097a48f5f7806ff	0	0	0	0	0	0	0	0	0	0	0	0	0	19	0	0	0	0	0	0	0	0	0	0	0
2999f0eb6cf42b7a93b426268bdfd36e	0	0	0	0	0	19	0	0	0	0	0	0	0	0	0	0	0	0	0	0	0	0	0	0	0
d3d47c436883312bfafe3e582c884cff	0	0	0	0	0	19	0	0	0	0	0	0	0	0	0	0	0	0	0	0	0	0	0	0	0
1f116b84e2368ee0f7c1c5a54e1558b9	0	10	0	0	9	0	0	0	0	0	0	0	0	0	0	0	0	0	0	0	0	0	0	0	0
2503c2d29b2ebb2e80d8468aa4cf08a2	0	0	0	0	0	0	0	0	0	0	0	0	0	0	0	0	0	0	0	0	0	0	0	0	0
f27f4d95c345cee4243573c8fe2589e8	0	19	0	0	0	0	0	0	0	0	0	0	0	0	0	0	0	0	0	0	0	0	0	0	0
c98bc412ee55977f05b949d226daf313	0	19	0	0	0	0	0	0	0	0	0	0	0	0	0	0	0	0	0	0	0	0	0	0	0
74e1a3dd8d7642a5be6b0322b381f352	0	0	0	0	0	0	0	0	0	0	0	0	0	0	0	0	0	0	0	9	0	0	0	0	0
0ac461e6125968e0375ce20488ff121d	0	0	0	0	0	0	0	0	0	0	0	0	0	0	0	0	0	0	0	9	0	9	0	0	0
1b47cb2fafa6d413a68c824c319b0e13	0	0	0	0	0	0	0	0	0	0	0	0	0	0	0	0	0	0	9	9	0	0	0	0	0
b7e96108676cee607afdd85143cb59af	0	0	0	0	0	0	0	0	0	0	0	0	0	0	0	0	0	0	0	18	0	0	0	0	0
1262198ae9e13286018226a595f2b495	0	0	0	0	0	0	0	0	0	0	0	0	0	0	0	0	0	0	0	0	0	6	0	0	0
a3085c59dc00fb19bbe5b7f2d317c836	0	0	0	0	0	0	0	0	0	0	0	0	0	0	0	0	0	5	0	0	0	0	0	0	0
ab4f19a6edc67ef6a9bb94694bc2d9e0	0	0	0	0	0	0	0	0	0	0	0	0	0	2	10	0	0	0	2	0	0	4	0	0	0
b9ce9417dd351b711c5ef18417918de9	0	0	0	0	0	0	0	0	0	0	0	0	0	0	0	0	0	0	0	0	0	12	0	0	0
1c2a04146c63d62edc64cf611bed341b	0	0	0	0	0	0	0	0	0	0	0	0	0	0	0	0	0	0	0	0	0	13	0	0	0
f014078106b7198d0770a8687b03a481	0	0	0	2	0	2	4	0	0	0	0	0	0	0	0	0	0	0	2	0	0	0	0	5	3
1008871f7871f8b3cb42905ffe0807b2	0	0	0	0	0	0	0	0	0	7	0	0	5	0	0	4	0	0	2	0	0	0	0	0	0
63d33e23b0cad706d8173eece2317cd4	0	0	0	0	0	0	0	0	0	0	0	0	0	0	0	0	0	18	0	0	0	0	0	0	0
c2dfbf3ce011de124ad8ad93251873b7	0	0	0	0	0	0	0	0	0	0	0	0	0	0	0	5	0	0	0	0	0	0	0	8	0
3e9b138d7f53dca5a397d27ce106fef2	0	0	0	0	0	0	0	0	0	0	4	0	0	0	0	0	0	0	0	0	0	0	0	0	0
3ac01279c3d5a43570aa7a7714b295f2	0	0	0	0	0	0	0	0	0	0	0	0	0	0	0	0	0	0	0	0	0	0	0	18	0
3ce0f9074b4c92a69f6ad327d0ed9de8	0	0	0	0	0	11	0	0	0	0	0	0	0	0	0	0	0	0	0	0	0	0	0	7	0
6ef1b4a0b92b7fa2d00bbd1686d4c56b	0	0	0	0	0	0	0	0	9	0	3	0	0	0	0	0	0	0	0	0	0	0	0	0	0
a728d484b222f3dc323178bdc66e3bc6	0	0	0	0	5	0	0	0	0	6	0	0	0	0	0	0	0	0	0	0	0	0	0	0	0
3b346f7871834ba3ef114297324b0108	0	0	0	0	0	0	0	0	0	0	18	0	0	0	0	0	0	0	0	0	0	0	0	0	0
588e05d6b9a22c0b8ee6a497de1353f5	0	0	0	0	5	0	0	0	0	0	0	0	0	0	0	6	7	0	0	0	0	0	0	0	0
53f4387c761518669120d4ff1ab09095	0	0	0	0	0	0	0	0	0	0	0	0	0	0	0	0	18	0	0	0	0	0	0	0	0
dc2895137ceefce6fb66af830cc26404	0	0	0	0	0	0	0	0	0	0	0	0	0	0	18	0	0	0	0	0	0	0	0	0	0
5613d43c42f988fe8c3c8897441593e0	0	0	0	0	0	0	0	0	0	0	0	0	0	0	0	0	0	0	0	0	0	0	0	0	0
8b80aae854556cf7a8cf64d31d297973	0	0	0	0	0	18	0	0	0	0	0	0	0	0	0	0	0	0	0	0	0	0	0	0	0
7cae88c33ef8cc4ab7a960bdda3eb904	0	0	0	0	0	18	0	0	0	0	0	0	0	0	0	0	0	0	0	0	0	0	0	0	0
5db928a6082fa132d4b483dc29f324fc	0	0	0	0	0	15	0	0	0	0	0	0	0	0	0	0	0	0	0	0	0	0	0	0	0
3b221811d20685af02edcece51af984d	0	0	0	0	15	3	0	0	0	0	0	0	0	0	0	0	0	0	0	0	0	0	0	0	0
e1c40a14ac14544fe5ef9222ee873869	0	0	0	0	9	4	5	0	0	0	0	0	0	0	0	0	0	0	0	0	0	0	0	0	0
5544933347f9e68a6a0d19068fb51b02	0	0	0	0	0	18	0	0	0	0	0	0	0	0	0	0	0	0	0	0	0	0	0	0	0
50e014d7f4b3a7b7f9c45e06da2d9db9	0	0	0	0	18	0	0	0	0	0	0	0	0	0	0	0	0	0	0	0	0	0	0	0	0
fafee1795d5ae00b443831ed0aa3217a	0	0	0	0	18	0	0	0	0	0	0	0	0	0	0	0	0	0	0	0	0	0	0	0	0
d609d14ee3a867727de43b869aca6cfc	0	0	0	0	0	0	18	0	0	0	0	0	0	0	0	0	0	0	0	0	0	0	0	0	0
3f78534f81194dfdd65d7a144ff05228	0	18	0	0	0	0	0	0	0	0	0	0	0	0	0	0	0	0	0	0	0	0	0	0	0
b19d5f5a206275dab7664a0e36e876e7	0	18	0	0	0	0	0	0	0	0	0	0	0	0	0	0	0	0	0	0	0	0	0	0	0
9d7b28311376e6cdcaac2576df7928ee	0	18	0	0	0	0	0	0	0	0	0	0	0	0	0	0	0	0	0	0	0	0	0	0	0
54361d644723a9d19965dd5230900c06	0	0	0	0	0	0	0	0	0	0	0	0	0	0	0	0	0	8	0	9	0	0	0	0	0
90a4d3b9ddea5d1bee651e5454f44f09	0	0	0	0	0	0	0	0	0	0	0	0	0	0	0	0	0	0	0	17	0	0	0	0	0
f9c2d44299d7f2517d709af9961e5e36	0	0	0	0	0	0	0	0	0	0	0	0	0	0	0	0	0	4	0	7	0	0	0	0	0
21be7e5b92f7c185e2ec57f353f7d66b	0	0	0	0	0	0	0	0	0	0	0	0	0	0	0	0	0	3	0	5	0	0	0	7	0
710bf757a104c4079e94dc15d8c3550a	0	0	0	0	0	0	0	0	0	0	0	0	0	0	0	0	0	0	0	0	0	0	0	0	0
0e6ada3f7a8b803d39f891c819b3f207	0	0	0	0	0	0	0	0	0	0	0	0	0	0	0	0	0	0	0	0	0	0	0	0	0
d3083d224d1fc00112655662e60a993e	0	0	0	0	0	0	0	0	0	0	0	0	0	0	0	0	0	0	0	0	0	9	0	0	0
55ef48e30116bc8dec158c095d8aa071	0	0	0	0	0	0	0	0	0	0	0	0	0	0	0	0	0	0	0	0	0	0	0	0	0
730f55c49315ee06abbc8e1811e4e0a8	0	0	0	0	0	0	0	0	0	0	0	0	0	0	0	0	0	0	0	0	0	0	0	0	0
abe805c9d466f6a95db00416595e1155	0	0	0	0	0	0	0	0	0	0	0	0	0	0	0	0	0	0	0	0	0	0	0	0	0
5f778b651f308ad0f77971b0d4a44727	0	0	0	0	0	0	0	0	0	0	0	0	0	0	0	0	0	0	0	0	0	9	8	0	0
e81728e297e5ecced36c2a092d7c4643	0	0	0	0	0	0	0	0	0	0	0	0	0	0	0	0	0	0	12	0	0	5	0	0	0
7794d8f9446efa6ec04a8dedd2d5196f	0	0	0	0	0	0	2	0	5	0	0	7	0	0	0	0	0	0	0	0	0	3	0	0	0
e31e72ace4c42b9ad01cd4014010c226	0	0	0	0	0	0	0	0	0	0	0	0	0	0	0	0	0	0	0	0	0	17	0	0	0
898edfeed0604c59d484185f31b1056c	0	0	0	0	0	0	0	0	0	0	0	0	0	0	0	0	0	0	0	0	0	17	0	0	0
50734022dc4017821cdab5cbe71da2c7	0	0	0	0	0	0	0	0	0	0	0	0	0	0	0	0	0	7	10	0	0	0	0	0	0
1928639375f1f7a93386b0583160910d	0	0	0	0	0	0	0	0	0	0	0	0	0	0	0	0	0	0	17	0	0	0	0	0	0
a43bc5f5d6c4d11f916b38b4eae195e0	0	0	0	0	0	0	0	0	0	0	0	0	0	0	0	0	0	0	17	0	0	0	0	0	0
a94ad5dcfd351febcf0596e159746283	0	0	0	0	0	0	0	0	0	0	0	0	0	0	0	0	11	0	6	0	0	0	0	0	0
893b304b263ab5234c9bee725432c13e	0	0	0	0	0	0	0	0	0	0	0	0	0	0	0	0	0	0	17	0	0	0	0	0	0
1cad8afbbab5c2d51e61e01ce30280a4	0	0	0	0	0	0	0	0	0	0	0	0	0	0	0	0	0	17	0	0	0	0	0	0	0
bc95329d3af2b712bc12e841126796df	0	0	0	0	0	0	0	0	0	0	0	0	0	0	0	0	0	17	0	0	0	0	0	0	0
489e31bd38cdbbb86305bb7bdcb29697	0	0	0	0	0	0	0	0	0	0	0	0	0	0	0	0	0	3	0	0	0	0	0	14	0
1c7f2b2262ea70edaacb298fbe89ebc5	0	0	0	0	0	0	0	0	0	0	0	0	0	0	0	0	0	0	0	0	0	0	0	0	0
60414cb2b4d98bcfdcd29ac3b1bcb954	0	0	0	2	0	0	0	0	0	0	0	0	0	0	0	0	0	0	0	0	0	0	3	12	0
677d4b51cff54a754e24a94c2b16c861	0	0	0	0	0	0	0	0	0	0	0	0	0	0	0	0	0	0	0	0	0	0	0	0	17
2d7da90d6184c2ad129137ff3c4f8f8e	0	0	0	0	0	0	0	0	0	17	0	0	0	0	0	0	0	0	0	0	0	0	0	0	0
fa738e9da47d151d0acc599d50e86c2a	0	0	0	0	0	0	0	0	0	0	0	17	0	0	0	0	0	0	0	0	0	0	0	0	0
25881975d429d99477fd4d7868524f01	0	0	0	0	0	0	0	0	0	0	0	0	0	0	0	17	0	0	0	0	0	0	0	0	0
554601c54b92b3988dd2882d4be8bfd7	0	0	0	0	0	5	0	0	0	0	0	0	0	0	0	0	0	0	0	0	0	0	0	0	0
540a61cb0780c3a4f8bec3fa79668b6d	0	5	0	0	12	0	0	0	0	0	0	0	0	0	0	0	0	0	0	0	0	0	0	0	0
25aa0bbad91b65a99d37cfc8ef90f890	0	0	0	0	17	0	0	0	0	0	0	0	0	0	0	0	0	0	0	0	0	0	0	0	0
ffb36776d1174160aa36933c46bbb194	0	0	0	0	17	0	0	0	0	0	0	0	0	0	0	0	0	0	0	0	0	0	0	0	0
09d606a473f0663a4dbd9630e62efba9	0	0	0	0	17	0	0	0	0	0	0	0	0	0	0	0	0	0	0	0	0	0	0	0	0
dad54efeebeda9947025e0c2ab1dd31d	0	17	0	0	0	0	0	0	0	0	0	0	0	0	0	0	0	0	0	0	0	0	0	0	0
cd177e156b7eb40deda96ea319e29ac4	0	0	0	0	0	2	0	0	0	0	0	0	7	0	0	0	0	0	0	0	7	0	0	0	0
747bde25b5c0461705c7f2348123344b	0	0	0	0	0	0	0	0	0	0	4	0	0	5	0	0	0	0	0	7	0	0	0	0	0
41bb370845c20a9192c0a328edc743bc	0	0	0	0	0	0	0	0	0	0	0	0	0	0	0	0	0	0	0	16	0	0	0	0	0
697b13b43d51273aea414c9d7d2037ea	0	0	0	0	0	0	0	0	0	0	0	0	0	0	0	0	0	0	0	16	0	0	0	0	0
9a87e2c79276026a7d5a12ebab958d1d	0	0	0	0	0	0	0	0	0	0	0	0	0	0	0	0	0	7	3	3	0	0	0	0	0
cdb655749a8ef76bbaa213d7c03b54bd	0	0	0	0	0	0	0	0	0	0	0	0	0	5	0	0	0	0	0	0	0	0	0	0	0
308b5d97995bd9e8d53d47a7d6f88f06	0	0	0	0	0	0	0	0	0	0	0	0	0	0	0	0	0	0	0	0	0	0	0	0	0
d8bc343ce3bf4f874f416101de350eb2	0	0	0	0	0	0	0	0	0	0	0	0	0	0	0	0	0	0	0	0	0	11	0	0	0
8cd3967a00aa412dc4621c182473bbed	0	0	0	0	0	0	0	0	0	0	0	0	0	0	0	0	0	0	0	0	0	0	0	0	0
563b5c2087850b519dcdf67f08e33fd5	0	0	0	0	0	4	0	0	0	0	0	0	0	0	0	0	7	0	0	0	0	0	0	0	0
71070256262c657af38a7eb2dd85bcf4	0	0	0	0	0	0	0	0	0	0	0	0	0	0	0	0	0	0	0	0	0	16	0	0	0
73ed6859fa35834967057c43647217d1	0	0	0	0	0	0	0	0	0	0	0	0	0	0	0	0	0	10	0	0	0	6	0	0	0
f2045f52c2ac9f2c7d8fffd7bcbe3c98	0	0	0	0	0	0	0	0	0	0	0	0	0	0	0	0	0	0	0	0	0	16	0	0	0
0aa74e5c5928178a14ecc74ce3bbdb7b	0	0	0	0	0	0	0	0	0	0	0	0	0	0	0	3	3	3	0	0	0	0	7	0	0
1690bf831c9271bc748db7d1c391c7f1	0	0	0	0	0	0	0	0	0	0	0	0	0	0	0	0	0	16	0	0	0	0	0	0	0
f252be6322ddac4ceae7e31f82959c19	0	0	0	0	0	0	0	0	0	0	0	0	0	0	0	0	0	16	0	0	0	0	0	0	0
755bb1923faf660bab7f8d4058065f80	0	0	16	0	0	0	0	0	0	0	0	0	0	0	0	0	0	0	0	0	0	0	0	0	0
08e0971f6997633221d8a3f16b0546b2	0	0	0	0	0	0	0	0	0	0	0	0	4	4	0	0	0	0	0	0	0	0	8	0	0
393233d2c49feacbffed448d1d3255c1	0	0	0	0	5	0	0	0	0	0	0	2	0	0	0	0	0	0	0	0	0	0	4	0	0
45f109a7df76ba525474c0e084777daf	0	0	0	0	0	2	0	0	0	0	0	0	0	7	0	0	0	0	0	0	0	0	0	0	7
078693c7b04a20fd11efa13cd0a77c01	0	0	0	0	0	0	0	0	0	0	0	0	10	0	0	0	0	0	0	0	0	0	0	6	0
7d95a037ca44634275382d35fc8fc5dc	0	0	0	0	0	0	0	0	4	0	0	12	0	0	0	0	0	0	0	0	0	0	0	0	0
e09b2da2a80afd1da543f958fdc4f52e	0	0	0	0	0	0	5	0	5	0	0	3	0	0	0	0	0	0	0	0	0	0	0	0	0
981f500b5ae9667a734edf785fc4697a	0	0	0	0	0	0	0	0	16	0	0	0	0	0	0	0	0	0	0	0	0	0	0	0	0
f4bf850af6e2b38421f8cefac2619356	0	0	0	0	0	0	0	0	9	0	0	7	0	0	0	0	0	0	0	0	0	0	0	0	0
ac8cb51cfd6bc7a742363b7e223d52db	0	0	0	0	0	0	0	0	16	0	0	0	0	0	0	0	0	0	0	0	0	0	0	0	0
9dbb398dfdcdc080a41dc4fe48f968b8	0	5	0	0	0	0	0	0	0	11	0	0	0	0	0	0	0	0	0	0	0	0	0	0	0
9e7881dc81a5c6cb4c872b01837d4a1a	0	0	0	0	0	0	0	0	0	16	0	0	0	0	0	0	0	0	0	0	0	0	0	0	0
a84b28212fb0e4710f5f688bcecfcce5	0	0	0	0	0	0	0	0	0	0	16	0	0	0	0	0	0	0	0	0	0	0	0	0	0
143f772f6ff05cea02b3cc937e3b6405	0	0	0	0	0	0	0	0	0	0	0	16	0	0	0	0	0	0	0	0	0	0	0	0	0
f9887141bf8d426c7282861c48328f09	0	0	0	0	0	0	0	0	0	0	0	16	0	0	0	0	0	0	0	0	0	0	0	0	0
351474bfe987b4267703c05375932b67	0	0	0	0	0	0	0	0	0	0	0	0	16	0	0	0	0	0	0	0	0	0	0	0	0
6a711edec839281c45b2738d36c5fed4	0	0	0	0	0	0	0	0	0	0	0	0	0	0	0	16	0	0	0	0	0	0	0	0	0
3b6d9462660f9d79ed5e44ea35704397	0	0	0	0	0	0	0	0	0	0	0	0	0	0	0	16	0	0	0	0	0	0	0	0	0
484e7aa18f84f8e89bdc80a3e9a294ca	0	0	0	0	0	8	0	0	0	0	0	0	0	0	0	0	0	0	0	0	0	0	0	0	0
cf715c2a0f5c38e79a65c12175eb0ca3	0	0	0	0	0	0	0	0	0	0	0	0	0	0	0	0	0	0	0	0	0	0	0	0	0
6fffa05daf3ef7417df553b3ceb7d497	0	0	0	0	10	6	0	0	0	0	0	0	0	0	0	0	0	0	0	0	0	0	0	0	0
3b9ec84ac41abb5f27381a7c490a7c76	0	0	0	0	9	7	0	0	0	0	0	0	0	0	0	0	0	0	0	0	0	0	0	0	0
2c64fbd88c85033cb30dd0506bd94d10	0	0	0	0	0	16	0	0	0	0	0	0	0	0	0	0	0	0	0	0	0	0	0	0	0
f556da21ce602352a344e6411cc2c5e9	0	0	0	0	16	0	0	0	0	0	0	0	0	0	0	0	0	0	0	0	0	0	0	0	0
32008af3e71a483de305ae24a4675061	0	0	0	0	16	0	0	0	0	0	0	0	0	0	0	0	0	0	0	0	0	0	0	0	0
bcd0d31c835e991eaf9d86643ac08277	0	3	0	0	0	0	0	0	0	0	0	0	0	0	0	0	0	0	0	0	0	0	0	0	0
8389e38d5b097326e00601d30fc6a6df	0	8	0	0	0	0	0	0	0	0	0	0	0	0	0	0	0	0	0	0	0	0	0	0	0
e64e8fae98f6f516a63de2fac959d2de	0	16	0	0	0	0	0	0	0	0	0	0	0	0	0	0	0	0	0	0	0	0	0	0	0
8fb731fda6d76c7dfc40935d75fdc72d	0	16	0	0	0	0	0	0	0	0	0	0	0	0	0	0	0	0	0	0	0	0	0	0	0
ce0bba344cb115a1bf71acda2bd1811e	0	16	0	0	0	0	0	0	0	0	0	0	0	0	0	0	0	0	0	0	0	0	0	0	0
c73ad1f52e6ec327e3e7751d6f8c923e	0	0	0	0	0	0	0	0	0	0	0	0	0	0	0	0	0	0	3	12	0	0	0	0	0
71994c438f06eebb4bc32149b0520c1e	0	0	0	0	0	0	0	0	0	0	0	0	0	0	0	0	0	0	0	7	0	8	0	0	0
87316b5353710b42302e5579870e8f35	0	0	0	0	0	0	0	0	0	0	0	0	0	0	0	0	0	0	0	0	0	0	0	0	0
d49dbc8289cbf7ee4dda8696f9613e38	0	0	0	0	0	0	0	0	0	0	0	0	6	0	0	0	0	0	0	0	0	5	0	0	0
b62f088cdb488e34ef9b28af036de11d	0	0	0	0	0	0	0	0	0	0	0	0	0	0	0	4	0	0	0	0	0	5	6	0	0
7185cf8d57f400d87e6f3d51d592e503	0	0	0	0	0	0	0	0	0	0	0	0	0	0	0	0	0	0	0	0	0	15	0	0	0
0e1c3f5d6ee35f0da462bce237e75111	0	0	0	0	0	0	0	0	0	0	0	0	0	0	0	0	0	0	0	0	0	15	0	0	0
1a1cae243eb71e00c9298130bb1e320c	0	0	0	0	0	0	0	0	0	0	0	0	0	0	0	0	0	7	0	0	0	8	0	0	0
3f1ff79f74c56537705236d87c781251	0	0	0	0	0	0	0	0	0	0	0	0	0	0	0	0	0	0	0	0	0	15	0	0	0
642a8f8808636f059eefdd1d7bcfc01e	0	0	0	0	0	0	0	0	0	0	0	0	0	0	0	0	0	3	0	0	0	12	0	0	0
b6402c231f10e8423c11b8c2d1f9e10d	0	0	0	0	0	0	0	0	0	0	0	0	0	0	0	0	0	9	6	0	0	0	0	0	0
1ed466a86834f8dffed1d7140975148d	0	0	0	0	0	0	0	0	0	0	0	0	0	0	0	0	0	7	8	0	0	0	0	0	0
0fda810a7742cc48df988fbad6d5cd1c	0	0	4	0	0	0	0	0	0	0	0	0	0	0	0	0	0	0	11	0	0	0	0	0	0
d532e238c149bbf21c642226b2961443	0	0	0	0	0	0	0	0	0	0	0	0	0	0	0	0	0	0	15	0	0	0	0	0	0
cc4fb0fd48f9088f3f8b17bd921a676a	0	0	0	0	0	0	0	0	0	0	0	0	0	0	0	0	0	0	15	0	0	0	0	0	0
581b8f4881f22dec4de702b23bdfea57	0	0	0	0	0	0	0	0	0	0	0	0	0	0	0	0	0	0	15	0	0	0	0	0	0
a304bd4cd09221581cdb6a066640c71d	0	0	0	0	0	0	0	0	0	0	0	0	0	0	0	0	0	0	15	0	0	0	0	0	0
70431e9242cafac30801dc90fb53df71	0	0	0	0	0	0	0	0	0	0	0	0	0	0	0	0	0	10	0	0	0	0	0	0	0
401e7d25becd319101a3ee88103e5668	0	0	0	0	0	0	0	0	0	0	0	0	0	0	0	0	0	15	0	0	0	0	0	0	0
43aed8f2738c3f7a1c358182e2ac101e	0	0	0	0	0	0	0	0	0	0	6	0	0	0	0	0	0	9	0	0	0	0	0	0	0
7588facb77abb7f82aabf3f078406166	0	0	0	0	4	0	0	0	0	0	0	0	0	0	0	0	0	0	0	0	0	0	4	7	0
b7940359acbe0fe72e75f4877ca54177	0	0	0	0	0	0	0	0	0	0	7	0	0	0	0	0	0	0	0	0	0	0	8	0	0
d49c76005bd93df9c73af5350d384989	0	0	0	0	0	0	0	0	0	0	0	0	0	12	0	0	0	0	0	0	0	0	3	0	0
e8db76a826244b5042be629d2b409f30	0	0	0	0	0	0	0	0	0	0	5	0	0	4	0	0	0	0	0	0	0	0	0	0	6
359567330f0fed5a27a3d9c39634d182	0	0	0	0	0	0	0	0	15	0	0	0	0	0	0	0	0	0	0	0	0	0	0	0	0
78a473dd93a863e0177377bf85ac9de1	0	0	0	0	0	0	0	15	0	0	0	0	0	0	0	0	0	0	0	0	0	0	0	0	0
b4bd4e1bb235b844c74a3aefbc2024b4	0	0	0	0	0	0	0	4	0	2	6	3	0	0	0	0	0	0	0	0	0	0	0	0	0
624e270531ca9267e65bc715cee00813	0	0	0	0	0	0	0	0	0	9	0	0	0	0	0	0	0	0	0	0	0	0	0	0	0
d9112e10ff8df1049c67a49b97df10b9	0	0	0	0	0	0	0	0	0	0	15	0	0	0	0	0	0	0	0	0	0	0	0	0	0
7380f1fbcf8c94f5e99cbc34f13f2be9	0	0	0	0	0	0	0	0	0	0	0	4	0	0	0	0	0	0	0	0	0	0	0	0	0
17f18e41f2a6383a14bcb4c06570d785	0	0	0	0	0	0	0	0	0	0	0	0	0	0	15	0	0	0	0	0	0	0	0	0	0
d39c791dca82ba95593dca17e13e3cb1	0	0	0	0	0	0	0	0	0	0	0	0	0	0	0	0	0	0	0	0	0	0	0	0	0
cf75d596bef161e2668c07dabbe1b9ed	0	0	0	0	15	0	0	0	0	0	0	0	0	0	0	0	0	0	0	0	0	0	0	0	0
b17ada30233100093044efae813a12a1	0	12	0	0	0	0	0	0	0	0	0	0	0	0	0	0	0	0	0	0	0	0	0	0	0
43d8f8518544b1a780e400910324f8e6	0	0	0	0	0	0	0	0	0	0	0	0	0	0	0	0	0	0	0	0	0	0	0	0	0
442f06819afe4d5a30492afd340e4a7f	0	0	0	0	0	0	0	0	0	0	0	0	0	8	0	0	0	0	0	6	0	0	0	0	0
1e1670f968cfaeb51af82d4a54e3bec9	0	0	0	0	0	0	0	0	0	0	0	0	0	0	0	0	0	0	0	6	0	0	0	0	0
dfbc5a897102ae09df8a3362d56db38e	0	0	0	0	0	0	0	0	0	0	0	0	0	0	0	0	0	0	0	14	0	0	0	0	0
9b9b3783fb56038ba27960b31ca0857e	0	0	0	0	0	0	0	0	0	0	0	0	0	0	0	0	0	0	0	14	0	0	0	0	0
89c8360ab5dd92a85522c89157c95357	0	0	0	0	0	0	0	0	0	0	0	0	0	0	0	0	0	0	0	0	0	0	0	0	0
3bdbeb2f67946928087348b9d2028f63	0	0	0	0	0	0	0	0	0	0	0	0	0	0	0	0	0	0	0	0	0	0	0	0	0
cc330d94e49b4cf16fff1726a02614ee	0	0	0	0	0	0	0	0	0	0	0	0	0	0	0	0	0	0	0	0	0	0	0	0	0
0d97f3619ddc3c4e2a8aec298172acfe	0	0	0	0	0	0	0	0	0	0	0	0	0	0	0	0	0	5	0	0	0	0	0	0	0
e75410a0acf95f0bbf1de75aa9c9464d	0	0	0	0	0	0	0	0	0	0	0	0	0	0	0	0	0	0	0	0	0	11	0	0	0
17fc2236c06975bb7a996c2501a36167	0	0	0	0	0	0	0	0	0	0	0	0	0	0	0	0	0	0	0	0	0	0	0	0	0
817e309984aeed7f2df2488ba219fc82	0	0	0	0	0	0	0	0	0	0	0	0	0	0	0	0	0	0	0	0	0	4	0	0	0
ec87b94c8e47e2832fd72ca456272cbc	0	0	0	0	0	0	0	0	0	0	0	0	0	0	0	0	0	5	0	0	0	0	0	0	0
f8a29d9ff0065882819060a95a0029d5	0	0	0	0	0	0	0	0	0	0	0	0	0	0	0	0	0	0	0	0	0	0	0	0	0
32acf58cbdc4fbc3edf4f70496e18a56	0	0	0	0	0	0	0	0	0	0	0	0	0	0	0	0	0	0	0	0	0	14	0	0	0
284cd70e89fb6e3bd844bbb71d2ac043	0	0	0	0	0	0	0	0	0	0	0	0	0	0	0	0	0	0	0	0	0	5	0	6	3
5e655094f5fb6427af4a16e5dce773de	0	0	0	0	0	0	0	0	0	0	0	0	0	0	0	0	0	5	0	0	0	9	0	0	0
22645bcf097358662740efcee2c221b9	0	0	0	0	0	0	0	0	0	0	0	0	0	0	0	0	0	0	0	0	0	14	0	0	0
2e9368f84f4a93424f7fe33293c6a61c	0	0	0	0	0	0	0	0	0	0	0	0	0	0	0	0	0	0	0	0	0	14	0	0	0
a61daa8c9d62a8d38b9464bb7aa23013	0	0	0	0	0	0	0	0	0	0	0	0	0	0	0	0	0	14	0	0	0	0	0	0	0
4159086a29872ea7f5a63df0bf032188	0	0	0	0	0	0	0	0	0	0	0	0	0	0	0	0	0	5	0	0	0	0	0	0	9
268df549ac4b9a76d8dd6839ac440553	0	0	0	0	0	0	0	0	0	0	0	0	9	0	0	0	0	0	0	0	0	0	0	0	0
9a8ed2ea7bbb2ba004437bddd8189d33	0	0	0	0	0	0	0	0	0	0	0	0	0	0	0	0	0	0	0	0	0	0	14	0	0
09accf331de8746878e25224c343c3bb	0	0	0	0	0	0	0	0	0	0	0	0	0	0	0	0	0	0	0	0	0	0	0	8	6
576ce65d2b248cb90e3fe2c87cfc06fe	0	0	0	0	0	0	0	0	6	0	0	0	0	0	0	0	0	0	0	0	0	0	0	0	0
bcb7c45ec879e9dcf0b8dfb73cbeef5c	0	0	0	0	0	0	0	0	3	11	0	0	0	0	0	0	0	0	0	0	0	0	0	0	0
a587c23978e41d4aed3903f783a74227	0	0	0	0	0	0	0	0	0	0	0	4	0	7	0	0	0	0	0	0	0	0	0	0	0
6882ddb1fde45004e8585a6aee57e16a	0	0	0	0	0	0	0	0	0	0	0	14	0	0	0	0	0	0	0	0	0	0	0	0	0
e765e7c4a09b55e5986b065735b36b48	0	0	0	0	0	0	0	0	0	0	0	0	0	0	0	0	0	0	0	0	0	0	0	0	0
9daf9a374d49e9bc75d7219b8741c43f	0	0	0	0	0	0	0	0	0	0	0	0	0	14	0	0	0	0	0	0	0	0	0	0	0
4f57c9b3b7075d8e7392eac0763abcec	0	0	0	0	0	0	0	0	0	0	0	0	0	0	0	14	0	0	0	0	0	0	0	0	0
35b6846c4dc0f02655e27f53219d6f65	0	0	0	0	0	0	0	0	0	0	0	0	0	0	0	0	0	0	0	0	0	0	0	0	0
09d1889d0a6c55019d8ff975b9307a4c	0	0	0	0	0	0	0	0	0	0	0	0	0	0	0	0	0	0	0	0	0	0	0	0	0
b579544bdb6aab7b4e53c3b6922d10bf	0	7	0	0	0	7	0	0	0	0	0	0	0	0	0	0	0	0	0	0	0	0	0	0	0
db216788292ed3831c82cc57b421757c	0	0	0	0	0	14	0	0	0	0	0	0	0	0	0	0	0	0	0	0	0	0	0	0	0
f40dad355b78cef122576bca06fcfb89	0	0	0	0	14	0	0	0	0	0	0	0	0	0	0	0	0	0	0	0	0	0	0	0	0
2559591426fba7571604c9ff27f9f42f	0	0	0	0	7	0	0	0	0	0	0	0	0	0	0	0	0	0	0	0	0	0	0	0	0
af2b2dea21b5bb208f39cb4d2523138f	0	0	0	0	0	0	14	0	0	0	0	0	0	0	0	0	0	0	0	0	0	0	0	0	0
b2650d0e56a177baf0b76d7513c1df2a	0	0	0	0	0	0	0	0	0	0	0	0	0	0	0	0	0	0	0	0	0	0	0	0	0
d0b5fe6cb88f7a3e858884410c6223c6	0	8	0	0	0	0	0	0	0	0	0	0	0	0	0	0	0	0	0	0	0	0	0	0	0
bb78ff6859e67264b3ef084d97c672ed	0	14	0	0	0	0	0	0	0	0	0	0	0	0	0	0	0	0	0	0	0	0	0	0	0
1da32f3effc392d9250cb1664dc719e3	0	14	0	0	0	0	0	0	0	0	0	0	0	0	0	0	0	0	0	0	0	0	0	0	0
82994f12052b745ec9a3007459b96662	0	0	0	0	0	0	0	0	0	0	0	0	0	0	0	0	0	0	5	0	4	0	0	0	0
0c26ef88e21de8de3557fcbddf4462f9	0	0	0	0	0	0	0	0	0	0	0	0	0	0	0	0	0	0	0	0	13	0	0	0	0
aee89fa561e5830e735d0719a7a24a62	0	0	0	0	0	0	0	0	0	0	0	0	0	0	0	0	0	0	0	13	0	0	0	0	0
af4b3d1ca3d2ea66e0b9b512e5afefda	0	0	0	0	0	0	0	0	0	0	0	0	0	6	0	0	0	0	0	7	0	0	0	0	0
08c167f535d761129946e34d34d3ade5	0	0	0	0	0	0	0	0	0	0	0	0	0	0	0	0	0	2	0	0	0	0	0	0	0
6725eb73cc26055c7740864d97ffdc62	0	0	0	0	0	0	0	0	0	0	0	0	0	0	0	0	0	3	0	0	0	10	0	0	0
a4951585b8e72263e493e6323abfa8d7	0	0	0	0	0	0	0	0	0	0	0	0	0	0	0	0	0	0	0	0	0	13	0	0	0
c9c678abdf8c87ffd15c684560d81365	0	0	0	0	0	0	0	0	0	0	0	0	0	0	0	0	0	0	0	0	0	13	0	0	0
3b63887fd9f3d1a35eedee0bab35493e	0	0	0	0	0	0	0	0	0	0	0	0	0	0	0	0	0	0	0	0	0	13	0	0	0
8eac64464ad87badd727261fa492b570	0	0	0	0	0	0	0	0	0	0	0	0	0	0	0	0	0	0	0	0	0	13	0	0	0
83b8cf7295e51d5ad601f4f4861f3470	0	0	0	0	0	0	0	0	0	0	0	0	0	0	0	0	0	0	0	0	0	13	0	0	0
40101688ba5baa77b8a6936bbf9a1e23	0	0	0	0	0	0	0	0	0	0	0	0	0	0	0	0	0	0	0	0	0	13	0	0	0
50e5bcc75dd12bf176b91eb452892fcf	0	0	0	0	0	0	0	0	0	0	0	0	0	0	0	0	0	0	0	0	0	13	0	0	0
d3e576dcd48b0a726eb1ba7b163f4270	0	0	0	0	0	0	0	0	0	0	0	0	0	0	0	0	0	0	0	0	0	13	0	0	0
20b1453d527278673c8abe6276e55dda	0	0	0	0	0	0	0	0	0	0	0	0	0	0	0	0	0	0	8	0	0	5	0	0	0
a7bb9d3e704bace831c4a2ab7591630d	0	0	0	0	0	0	0	0	0	0	0	0	0	0	0	0	0	13	0	0	0	0	0	0	0
6e0e41d8b69fded2ba5eaeff0bcad870	0	0	0	0	0	0	0	0	0	0	0	0	0	0	0	0	0	10	0	0	0	0	0	0	3
b1a408f83778a0f7530d4ec893528a94	0	0	0	0	0	0	0	0	0	0	0	0	0	0	0	0	0	13	0	0	0	0	0	0	0
93af7111f7440b921efc8d9bf14f1716	0	0	0	0	0	0	0	0	0	0	0	0	0	0	0	0	0	13	0	0	0	0	0	0	0
a53b64d70c09426f23d210f6ae2fd58b	0	0	0	0	0	0	0	0	0	0	0	0	0	0	0	0	0	13	0	0	0	0	0	0	0
9963102047d67cf4d3e149da5d0dba8d	0	0	0	0	0	0	0	0	0	0	0	0	0	0	0	0	0	0	0	0	0	0	0	0	0
5f5887933c8cbebca63cefba749795f3	0	0	0	8	0	0	0	0	0	0	5	0	0	0	0	0	0	0	0	0	0	0	0	0	0
c23ca39056774e871ce79f15e7051999	0	0	0	0	0	0	0	0	0	0	0	0	0	0	0	0	0	0	0	0	0	0	0	0	13
25950cd45ff62f3983b2625c0a277aff	0	0	0	0	0	0	0	0	0	0	0	0	0	0	0	0	9	0	0	0	0	0	0	0	4
30dc0d9445958380106d64795c89d1ec	0	0	0	0	0	0	0	0	0	0	0	0	0	0	0	0	0	0	0	0	0	0	0	13	0
cab983d0848b28b9d94a37bd29851131	0	0	0	0	0	0	0	0	6	0	0	0	0	0	0	0	0	0	0	0	0	0	0	0	0
09fadb6be67dabf47811f6b5a034e402	0	0	0	0	0	0	0	0	0	5	0	0	0	0	8	0	0	0	0	0	0	0	0	0	0
f8064690f1ee9538531f14bb6200c334	0	0	0	0	0	0	0	0	0	0	13	0	0	0	0	0	0	0	0	0	0	0	0	0	0
a088f6b61d98dc5202d51128199802da	0	0	0	0	11	0	0	0	0	0	0	2	0	0	0	0	0	0	0	0	0	0	0	0	0
336f4e7c33f45aa37fa876d4bc7bc986	0	0	0	0	0	13	0	0	0	0	0	0	0	0	0	0	0	0	0	0	0	0	0	0	0
720dfe5e328435743301f18fadf05e14	0	0	0	0	0	13	0	0	0	0	0	0	0	0	0	0	0	0	0	0	0	0	0	0	0
c0187f332aa3fd16865d242107696f64	0	0	0	0	13	0	0	0	0	0	0	0	0	0	0	0	0	0	0	0	0	0	0	0	0
d464280554ef0ae48fb7ee348333d1a5	0	0	0	0	13	0	0	0	0	0	0	0	0	0	0	0	0	0	0	0	0	0	0	0	0
21911688ea3047d29083c203fbc43c44	0	0	0	0	13	0	0	0	0	0	0	0	0	0	0	0	0	0	0	0	0	0	0	0	0
f887b012b8b1ad06035d9ae2e1a39917	0	0	0	0	13	0	0	0	0	0	0	0	0	0	0	0	0	0	0	0	0	0	0	0	0
96826c5e3b6d9e5ae32572675e78e92c	0	0	0	0	13	0	0	0	0	0	0	0	0	0	0	0	0	0	0	0	0	0	0	0	0
34f97b33b404d504011327af0c61642c	0	0	0	0	0	0	0	0	0	0	0	0	0	0	0	0	0	0	0	0	0	0	0	0	0
576ad476465f19bcc84b2464ddc0e3a2	0	0	0	0	0	0	0	0	0	0	0	0	0	0	0	0	0	0	0	0	0	0	0	0	0
7126f899535486383a970d9848811264	0	0	0	0	0	0	0	0	0	0	0	3	0	4	0	0	0	0	0	2	0	0	0	0	0
3c82086b908da3e909e993aba1f3954a	0	0	0	0	0	0	0	0	0	0	0	0	0	0	0	0	0	0	0	12	0	0	0	0	0
048ab69a3a0dc3742632ddbdde1ec112	0	0	0	0	0	0	0	0	0	0	3	0	0	0	0	0	0	5	0	4	0	0	0	0	0
c9ad3eea5675ec1ad0bbe6cea887a583	0	0	0	0	0	0	0	0	0	0	0	0	0	0	0	0	0	0	0	12	0	0	0	0	0
dfb8efef6002d949b153d46554867056	0	0	0	0	0	0	0	0	0	0	0	0	0	0	0	0	0	0	0	12	0	0	0	0	0
a5d407d4c8992f7ed2d79f6bb73dad58	0	0	0	0	0	0	0	0	0	0	0	0	0	0	0	0	0	0	0	0	0	0	0	0	0
fff7c74e12c3d14907a08039dac5853a	0	0	0	0	0	0	0	0	0	0	0	0	0	0	0	0	0	0	0	0	0	0	0	0	0
b5f019deeab756bbf5ecfef89af762c4	0	0	0	0	0	0	0	0	0	0	0	0	0	0	0	0	0	0	0	0	0	0	0	0	0
0c32015fc9a85dd08f86377b32fe5611	0	0	0	0	0	0	0	0	0	0	0	0	0	0	0	0	0	0	0	0	0	0	0	0	0
d8b22bfaee488d664e465a940a8ca617	0	0	0	0	0	0	0	0	0	0	0	0	0	0	0	0	0	0	5	0	0	0	0	0	0
abe5e9bcf05f716c2f955e310aed8d8c	0	0	0	0	0	0	0	0	0	0	0	0	0	0	0	0	0	0	0	0	0	12	0	0	0
857502c3b3ea23b70b4b5c1fdb34b5e6	0	0	0	0	0	0	0	0	0	0	0	0	0	0	0	0	0	0	0	0	0	12	0	0	0
89b77386884ca33106d160eb45d5d8b8	0	0	0	0	0	0	0	0	0	0	0	0	0	0	0	0	0	0	0	0	0	12	0	0	0
94347d9d468f1fb8b7773b8cce7b1691	0	0	0	0	0	0	0	0	0	0	0	0	0	0	0	0	0	0	0	0	0	12	0	0	0
191759331df04a2d8e2ba9085e6eaf2a	0	0	0	0	0	0	0	0	0	0	0	0	0	0	0	0	0	0	0	0	0	12	0	0	0
b8217bbf89d98c5d7d05a5dab436edd0	0	0	0	0	0	0	0	0	0	0	0	0	0	0	0	0	0	0	12	0	0	0	0	0	0
7c014086bf98fbe2ded90c9487a9301d	0	0	0	0	0	0	0	0	0	0	0	0	0	0	0	0	0	0	12	0	0	0	0	0	0
111971e6cf78b30f0f9412a200e793bd	0	0	0	0	0	0	0	0	0	0	0	0	0	0	0	0	0	12	0	0	0	0	0	0	0
996990e8847c6166ee77f8f41dc08c40	0	0	0	0	0	0	0	0	0	0	0	0	0	0	0	0	0	12	0	0	0	0	0	0	0
b0b69d833e808c93703a0381866f0bbe	0	0	0	0	0	0	0	0	0	0	0	0	0	0	0	0	0	0	0	0	0	0	5	0	0
52fbec2665080a224b263aa3045bff4e	0	0	0	4	0	0	0	0	0	0	0	0	3	0	0	5	0	0	0	0	0	0	0	0	0
18b6df36d059001f78b846859b9db5dd	0	0	0	0	0	0	0	0	0	0	0	0	0	0	0	0	0	0	0	0	0	0	8	0	4
69d3196e66040573d87979e7121c91d7	0	0	0	0	5	0	0	0	0	0	0	0	0	0	0	2	0	0	0	0	0	0	0	0	5
967ed878171c54a86d33d45bdbc19ec8	0	0	0	0	0	0	0	0	0	0	0	0	0	0	0	0	0	0	0	0	0	0	0	0	12
82e17bf9c6567c854daca677ca292899	0	0	0	0	0	0	0	0	5	0	0	7	0	0	0	0	0	0	0	0	0	0	0	0	0
76984f40ee2dc5df205e3ba2e8830b66	0	0	0	0	0	0	0	12	0	0	0	0	0	0	0	0	0	0	0	0	0	0	0	0	0
1a43c4d777f9c588fa024c49b85c8824	0	0	0	0	0	0	0	0	0	12	0	0	0	0	0	0	0	0	0	0	0	0	0	0	0
1fc90a0e0307d62890c182275c3cc01e	0	0	0	0	0	0	0	0	0	12	0	0	0	0	0	0	0	0	0	0	0	0	0	0	0
33c9a740a91a5cba3fc8c0949a79a9bb	0	0	0	0	0	0	0	0	0	0	9	0	0	0	0	0	0	0	0	0	0	0	0	0	0
da763a4d4bb589374957335de1246147	0	0	0	0	0	0	0	0	0	0	0	12	0	0	0	0	0	0	0	0	0	0	0	0	0
e97fda60cf84f0055d6652c7d587bd62	0	0	0	0	0	0	0	0	0	0	0	12	0	0	0	0	0	0	0	0	0	0	0	0	0
6a442a300eaa81acc7d20c0af28e030b	0	0	0	0	0	0	0	0	0	0	0	12	0	0	0	0	0	0	0	0	0	0	0	0	0
f78ceddc78280da6b1cf6980f01a4a77	0	0	0	0	0	0	0	0	0	0	0	0	0	0	0	0	0	0	0	0	0	0	0	0	0
0a8d02a517d4a82728ff9ed6e6348e21	0	3	0	0	0	0	6	0	0	0	0	0	0	0	0	0	0	0	0	0	0	0	0	0	0
8929ebd1f212d6c3429d5c9362297911	0	0	0	0	0	0	0	0	0	0	0	0	0	0	0	0	0	0	0	0	0	0	0	0	0
7cc864e27e88f0521726eff0633ecb23	0	0	0	0	0	0	0	0	0	0	0	0	0	0	0	0	12	0	0	0	0	0	0	0	0
c0d4a679335b64994924a32540bd568e	0	0	0	0	0	0	0	0	0	0	0	0	12	0	0	0	0	0	0	0	0	0	0	0	0
e5a647df75affdc1cdc5c067181931fd	0	0	0	0	0	0	0	0	0	0	0	0	0	12	0	0	0	0	0	0	0	0	0	0	0
efa65a70fb88fef64ae317ab93ce893c	0	0	0	0	0	0	0	0	0	0	0	0	0	0	5	7	0	0	0	0	0	0	0	0	0
8d53c915eca8f26e4b531dec51026ce3	0	0	0	0	0	0	0	0	0	0	0	0	0	0	0	12	0	0	0	0	0	0	0	0	0
c7f5ca98a966cd55618ef49118d3ea55	0	0	0	0	0	0	0	0	0	0	0	0	0	0	0	0	0	0	0	0	0	0	0	0	0
03c4ac7330e33a3095bdf9f973c560c5	0	0	0	0	0	0	0	0	0	0	0	0	0	0	0	0	0	0	0	0	0	0	0	0	0
04ba8f8f5dca1b6ea203e0bac529d8ee	0	0	0	0	0	0	0	0	0	0	0	0	0	0	0	0	0	0	0	0	0	0	0	0	0
fd3474373130536efec5e8663e965848	0	2	0	0	4	6	0	0	0	0	0	0	0	0	0	0	0	0	0	0	0	0	0	0	0
20c59b85241e44e58001dc4830cf59c2	0	0	0	0	0	12	0	0	0	0	0	0	0	0	0	0	0	0	0	0	0	0	0	0	0
c18f70982da97a22bb84bef3db39380d	0	0	0	0	0	12	0	0	0	0	0	0	0	0	0	0	0	0	0	0	0	0	0	0	0
27ba999b7ab8dc008b9e405fa2611e7b	0	0	0	0	0	12	0	0	0	0	0	0	0	0	0	0	0	0	0	0	0	0	0	0	0
22a2ed8e8b8691eff5774fec50a6cf7f	0	0	0	0	12	0	0	0	0	0	0	0	0	0	0	0	0	0	0	0	0	0	0	0	0
ca85a67131409bc1582b368f9f202e5b	0	0	0	0	0	0	12	0	0	0	0	0	0	0	0	0	0	0	0	0	0	0	0	0	0
fea5bb78fa17c3ac56af347d041b13bd	0	0	0	0	0	0	12	0	0	0	0	0	0	0	0	0	0	0	0	0	0	0	0	0	0
e39ba90a4774dedc1ad92444f1f38a2c	0	0	0	0	0	0	12	0	0	0	0	0	0	0	0	0	0	0	0	0	0	0	0	0	0
10ea6f1d8a1083baf6f0ac3b34082a4e	0	12	0	0	0	0	0	0	0	0	0	0	0	0	0	0	0	0	0	0	0	0	0	0	0
3d9c81e65cfcd67fccbad9ff35f86ae5	0	12	0	0	0	0	0	0	0	0	0	0	0	0	0	0	0	0	0	0	0	0	0	0	0
8dbbb3bfd9861b7b6de98121a38d5c6a	0	0	0	0	6	0	0	0	0	0	0	3	0	0	0	0	0	0	0	0	2	0	0	0	0
7f5253a88b0a69df2552f0f53c2de6c5	0	0	0	0	0	0	0	0	0	0	0	0	0	0	0	0	0	0	0	0	11	0	0	0	0
05dad599e09104800aabcb10562ef3e3	0	0	0	0	0	0	0	0	0	0	0	0	0	0	0	0	0	0	0	0	11	0	0	0	0
db57dfa330ab1642788baeec74bb9da2	0	0	0	0	0	0	0	0	0	0	0	0	0	0	0	0	0	0	0	0	11	0	0	0	0
d2b09e2b275374e3b514b19602224ba4	0	0	0	0	0	0	0	0	0	0	0	0	0	0	0	0	0	0	0	11	0	0	0	0	0
c1e3f133971c32c48933ba6a94d06644	0	0	0	0	0	0	0	0	0	0	0	0	0	0	0	0	0	0	0	11	0	0	0	0	0
ead9062a7a468359ce1e21c4d5759583	0	0	0	0	0	0	0	0	0	0	0	0	0	0	0	0	0	0	0	3	0	0	0	0	0
39fae9e53ff81c99a12b2ea53bf80d6d	0	0	0	0	0	0	0	0	0	0	0	4	0	0	0	0	0	0	0	0	0	0	0	0	0
34de923a0630f4b267d739aa4c9d6290	0	0	0	0	0	0	0	0	0	0	0	0	0	0	0	0	0	0	0	0	0	0	0	0	0
dc8ba06d731b3c59c8b0339c8bc9ac82	0	0	0	0	0	0	0	0	0	0	0	0	0	0	0	0	0	0	0	0	0	11	0	0	0
fca5e98609d644b36023422067193cc3	0	0	0	0	0	0	0	0	0	0	0	0	0	0	0	0	0	0	0	0	0	11	0	0	0
6ce57cf5a320697c9d4daa77791d5e07	0	0	0	0	0	0	0	0	0	0	0	0	0	0	0	0	0	0	0	0	0	11	0	0	0
d1e17895f71d2bfddf59b3675ab2cb18	0	0	0	0	0	0	0	0	0	0	0	0	0	0	0	0	0	0	0	0	0	11	0	0	0
5ad03dd743cc9231c7aa94e87592f2f4	0	0	0	0	0	0	0	0	0	0	0	0	0	0	0	0	0	0	0	0	0	11	0	0	0
9eef13febe907da2a2cdca472c0ff8e9	0	0	0	0	0	0	0	0	0	0	0	0	0	0	0	0	0	0	0	0	0	11	0	0	0
43d38924970e30cdf00e732f418e565d	0	0	0	0	0	0	0	0	0	0	0	0	0	0	0	0	0	0	0	0	0	11	0	0	0
84c6a3aee8f1c257818a964c4d4c4538	0	0	0	0	0	0	0	0	0	0	0	0	0	0	0	0	0	0	11	0	0	0	0	0	0
9ce615e713079964e27fa76444cd8902	0	0	0	0	0	0	0	0	0	0	0	0	0	0	0	0	0	7	4	0	0	0	0	0	0
7db4ad8e7d652338437bb48739526888	0	0	0	0	0	0	0	0	0	0	0	0	0	0	0	0	0	0	11	0	0	0	0	0	0
959c8045a874c23f50a188a7a181970e	0	0	0	0	0	0	0	0	0	0	0	0	0	0	0	0	0	0	11	0	0	0	0	0	0
9fdf9ac072b0667aa01448a9dac0ae6b	0	0	0	0	0	0	0	0	0	0	0	0	0	0	0	0	0	0	0	0	0	0	0	0	0
[truncated: 1,549 more rows]
